# Supplementary material for: Light/inductive effect induced isomerization of chromeno-5-methyl-2,6,9-trioxabicyclo[3.3.1]nonadienes
Source: Royal Society of Chemistry journal article supplement (doi:10.1039/d0nj02288h), 2020-01-01

## Light/Inductive Effect Induced Isomerization of Chromeno-5-methyl-2,6,9-trioxabicyclo[3.3.1]nonadienes

Sameer Vyasamudri<sup>a</sup> and Ding-Yah Yang<sup>\*a,b</sup>

<sup>a</sup>*Department of Chemistry, Tunghai University,*

<sup>b</sup>*Graduate Program for Biomedical and Materials Science, Tunghai University*

*No. 1727, Sec. 4, Taiwan Boulevard, Xitun District, Taichung 40704, Taiwan,*

*Republic of China*

\*Corresponding author; Tel: 886-4-2359-7613; Fax: 886-4-2359-0426;

Email: [yang@thu.edu.tw](mailto:yang@thu.edu.tw)

### Supporting Information

#### Table of Contents

|                                                                                                                |         |
|----------------------------------------------------------------------------------------------------------------|---------|
| 1. General Information.....                                                                                    | S2      |
| 2. Single X-ray crystal structure and supporting information of <b>4a</b> and <b>5a</b> .....                  | S3-S6   |
| 3. General Synthetic Procedure and spectroscopic data of <b>4a-f</b> .....                                     | S7-S9   |
| 4. General Synthetic Procedure and spectroscopic data of <b>5a-f</b> .....                                     | S10-S12 |
| 5. General Synthetic Procedure and spectroscopic data of <b>7a-h</b> .....                                     | S13-S15 |
| 6. Reference .....                                                                                             | S15     |
| 7. Copies of <sup>1</sup> H and <sup>13</sup> C NMR spectra of <b>4a-f</b> , <b>5a-f</b> and <b>7a-h</b> ..... | S16-S51 |

## 1. General Information

Melting points were determined on a Mel-Temp melting point apparatus in open capillaries and are uncorrected. High resolution mass spectra (HRMS) were obtained on a Thermo Fisher Scientific Finnigan MAT95XL spectrometer using a magnetic sector analyzer. Single-crystal structures were determined with a Bruker AXS SMART-1000 X-ray single-crystal diffractometer.  $^1\text{H}$  NMR (400 MHz) and  $^{13}\text{C}$  NMR (100 MHz) spectra were recorded on a Bruker 400 spectrometer. Chemical shifts were reported in parts per million on the  $\delta$  scale relative to an internal standard (tetramethylsilane, or appropriate solvent peaks) with coupling constants given in hertz.  $^1\text{H}$  NMR multiplicity data are denoted by s (singlet), d (doublet), t (triplet), q (quartet), and m (multiplet). Photochemical reactions were performed using Rayonet reactor (PR-2000). UV-vis spectroscopy was recorded using Shimadzu UV-Spectrophotometer (UV-1800). Analytical thin-layer chromatography (TLC) was carried out on Merck silica gel 60G-254 plates (25 mm) and developed with the solvents mentioned. Solvents, unless otherwise specified, were reagent grade and distilled once prior to use. All new compounds exhibited satisfactory spectroscopic and analytical data. Commercially available appropriately substituted 4-hydroxycoumarins were purchased and used as received.

## 2. Supporting information for single crystal X-ray of **4a**.

Compound **4a** was dissolved in a mixture of CH<sub>2</sub>Cl<sub>2</sub> and hexanes (1:1), this solution was set aside for slow evaporation to get colourless needle like crystals. Single-crystal X-ray data for these crystals were collected at 150 K on a Bruker APEX-II CCD diffractometer using graphite-monochromated Mo KR radiation ( $\lambda = 0.71073\text{\AA}$ ). The crystal structures were solved by using SHELXS-97 and the structures were refined using SHELXL-97 2014. All non-hydrogen atoms were refined anisotropically. Hydrogen atoms were fixed at geometrically calculated positions and were refined using riding model.

Molecular structure of **4a** with atomic displacement shown at 50% probability. Crystallographic data, CCDC-1952549, can be obtained free of charge from the Cambridge Crystallographic Data Centre via [www.ccdc.cam.ac.uk/data\\_request.cif](http://www.ccdc.cam.ac.uk/data_request.cif).

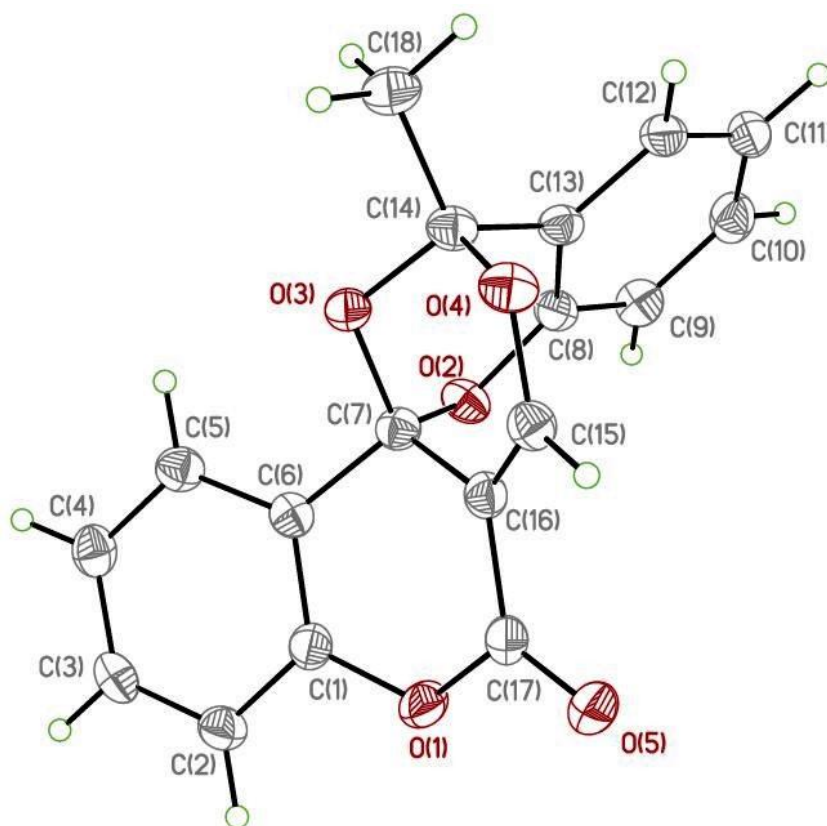

**Table S2.** Crystal data and structure refinement for **4a**.

|                                   |                                                         |                                                                                  |
|-----------------------------------|---------------------------------------------------------|----------------------------------------------------------------------------------|
| Identification code               | <b>4a</b>                                               |                                                                                  |
| Empirical formula                 | C <sub>18</sub> H <sub>12</sub> O <sub>5</sub>          |                                                                                  |
| Formula weight                    | 308.28                                                  |                                                                                  |
| Temperature                       | 150(2) K                                                |                                                                                  |
| Wavelength                        | 0.71073 Å                                               |                                                                                  |
| Crystal system                    | Monoclinic                                              |                                                                                  |
| Space group                       | P2 <sub>1</sub> /c                                      |                                                                                  |
| Unit cell dimensions              | a = 10.6500(3) Å<br>b = 17.8886(5) Å<br>c = 7.6179(2) Å | $\alpha = 90^\circ$ .<br>$\beta = 101.6871(12)^\circ$ .<br>$\gamma = 90^\circ$ . |
| Volume                            | 1421.23(7) Å <sup>3</sup>                               |                                                                                  |
| Z                                 | 4                                                       |                                                                                  |
| Density (calculated)              | 1.441 Mg/m <sup>3</sup>                                 |                                                                                  |
| Absorption coefficient            | 0.106 mm <sup>-1</sup>                                  |                                                                                  |
| F(000)                            | 640                                                     |                                                                                  |
| Crystal size                      | 0.400 x 0.350 x 0.150 mm <sup>3</sup>                   |                                                                                  |
| Theta range for data collection   | 3.000 to 26.403°.                                       |                                                                                  |
| Index ranges                      | -13<=h<=13, -22<=k<=22, -9<=l<=9                        |                                                                                  |
| Reflections collected             | 22834                                                   |                                                                                  |
| Independent reflections           | 2908 [R(int) = 0.0317]                                  |                                                                                  |
| Completeness to theta = 25.242°   | 99.5 %                                                  |                                                                                  |
| Absorption correction             | Semi-empirical from equivalents                         |                                                                                  |
| Max. and min. transmission        | 0.9281 and 0.8623                                       |                                                                                  |
| Refinement method                 | Full-matrix least-squares on F <sup>2</sup>             |                                                                                  |
| Data / restraints / parameters    | 2908 / 0 / 208                                          |                                                                                  |
| Goodness-of-fit on F <sup>2</sup> | 1.033                                                   |                                                                                  |
| Final R indices [I>2sigma(I)]     | R <sub>1</sub> = 0.0336, wR <sub>2</sub> = 0.0892       |                                                                                  |
| R indices (all data)              | R <sub>1</sub> = 0.0405, wR <sub>2</sub> = 0.0963       |                                                                                  |
| Extinction coefficient            | n/a                                                     |                                                                                  |
| Largest diff. peak and hole       | 0.268 and -0.211 e.Å <sup>-3</sup>                      |                                                                                  |

Supporting information for single crystal X-ray of **5a**.

Compound **5a** was dissolved in a mixture of CH<sub>2</sub>Cl<sub>2</sub> and MeOH (3:1), this solution was set aside for slow evaporation to get colourless cubic crystals. Single-crystal X-ray data for these crystals were collected at 150 K on a Bruker APEX-II CCD diffractometer using graphite-monochromated Mo KR radiation ( $\lambda = 0.71073\text{\AA}$ ). The crystal structures were solved by using SHELXS-97 and the structures were refined using SHELXL-97 2014. All non-hydrogen atoms were refined anisotropically. Hydrogen atoms were fixed at geometrically calculated positions and were refined using riding model.

Molecular structure of **5a** with atomic displacement shown at 50% probability. Crystallographic data, CCDC-1960547, can be obtained free of charge from the Cambridge Crystallographic Data Centre via [www.ccdc.cam.ac.uk/data\\_request.cif](http://www.ccdc.cam.ac.uk/data_request.cif).

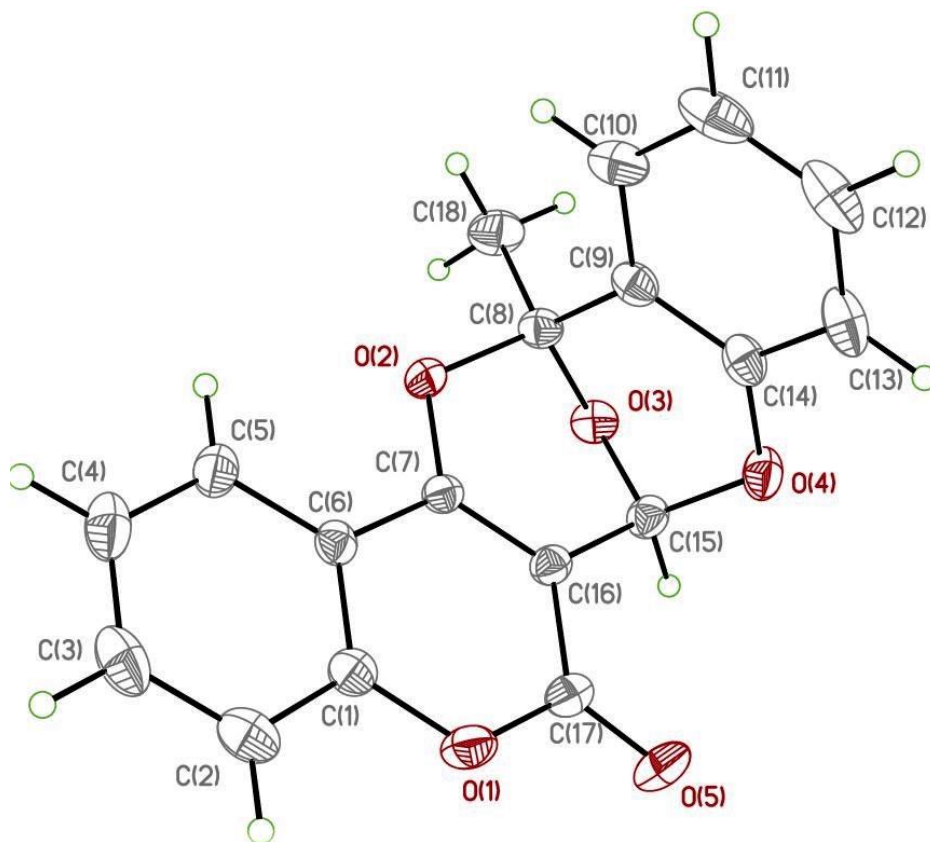

**Table S3.** Crystal data and structure refinement for **5a**.

|                                   |                                                         |                                           |
|-----------------------------------|---------------------------------------------------------|-------------------------------------------|
| Identification code               | <b>5a</b>                                               |                                           |
| Empirical formula                 | C <sub>18</sub> H <sub>12</sub> O <sub>5</sub>          |                                           |
| Formula weight                    | 308.28                                                  |                                           |
| Temperature                       | 150(2) K                                                |                                           |
| Wavelength                        | 0.71073 Å                                               |                                           |
| Crystal system                    | Monoclinic                                              |                                           |
| Space group                       | P2 <sub>1</sub> /c                                      |                                           |
| Unit cell dimensions              | a = 7.6581(2) Å<br>b = 17.9590(6) Å<br>c = 10.1131(3) Å | α = 90°.<br>β = 92.0863(11)°.<br>γ = 90°. |
| Volume                            | 1389.95(7) Å <sup>3</sup>                               |                                           |
| Z                                 | 4                                                       |                                           |
| Density (calculated)              | 1.473 Mg/m <sup>3</sup>                                 |                                           |
| Absorption coefficient            | 0.108 mm <sup>-1</sup>                                  |                                           |
| F(000)                            | 640                                                     |                                           |
| Crystal size                      | 0.430 x 0.370 x 0.340 mm <sup>3</sup>                   |                                           |
| Theta range for data collection   | 3.471 to 27.901°.                                       |                                           |
| Index ranges                      | -10 ≤ h ≤ 10, -23 ≤ k ≤ 23, -13 ≤ l ≤ 13                |                                           |
| Reflections collected             | 23177                                                   |                                           |
| Independent reflections           | 3292 [R(int) = 0.0331]                                  |                                           |
| Completeness to theta = 25.242°   | 99.2 %                                                  |                                           |
| Absorption correction             | Semi-empirical from equivalents                         |                                           |
| Max. and min. transmission        | 0.9281 and 0.8713                                       |                                           |
| Refinement method                 | Full-matrix least-squares on F <sup>2</sup>             |                                           |
| Data / restraints / parameters    | 3292 / 0 / 208                                          |                                           |
| Goodness-of-fit on F <sup>2</sup> | 1.029                                                   |                                           |
| Final R indices [I > 2σ(I)]       | R1 = 0.0376, wR2 = 0.1126                               |                                           |
| R indices (all data)              | R1 = 0.0424, wR2 = 0.1195                               |                                           |
| Extinction coefficient            | n/a                                                     |                                           |
| Largest diff. peak and hole       | 0.324 and -0.259 e.Å <sup>-3</sup>                      |                                           |

### 3. General Synthetic Procedure and spectroscopic data of **4a–f**:

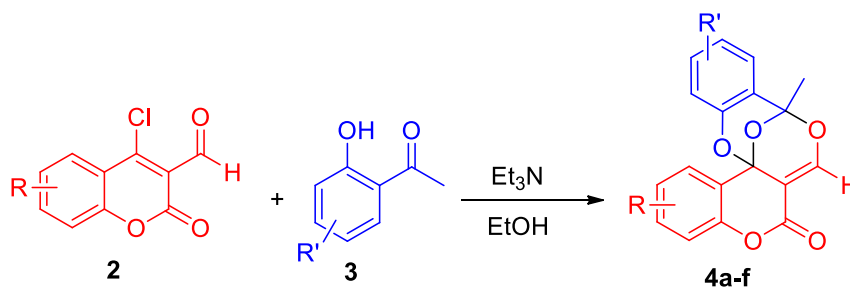

To a solution of appropriately substituted 4-chloro-3-formylcoumarin **2** (0.24 mmol) in EtOH (2 mL) was added appropriately substituted *o*-hydroxyacetophenones **3** (0.24 mmol) and triethylamine (0.24 mmol) at room temperature. The solution was then stirred at room temperature for two to six hours. The resulting precipitate was filtered, washed sequentially with ethanol, hexanes: dichloromethane (9:1), and dried under vacuum to obtain the desired product **4a–f**.

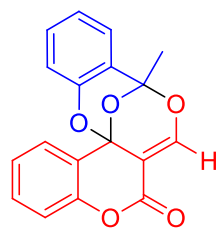

9-Methyl-9,14*a*-epoxybenzo[7,8][1,5]dioxocino[3,2-*c*]chromen-6(9*H*)-one (**4a**); Off-white solid;  $R_f = 0.50$  (30% EtOAc/hexanes); 55 mg; yield 74%; mp 156–158 °C (lit,<sup>1</sup> 153–154 °C); <sup>1</sup>H NMR (CDCl<sub>3</sub>, 400 MHz)  $\delta$  7.80–7.78 (m, 1H), 7.79 (s, 1H), 7.50 (td,  $J = 8.4, 1.6$  Hz, 1H), 7.38 (dd,  $J = 7.6, 1.2$  Hz, 1H), 7.35–7.28 (m, 2H), 7.21 (t,  $J = 8.4$  Hz, 1H), 7.08 (t,  $J = 7.6$  Hz, 1H), 6.88 (d,  $J = 8.0$  Hz, 1H), 2.09 (s, 3H); <sup>13</sup>C{<sup>1</sup>H} NMR (CDCl<sub>3</sub>, 100 MHz)  $\delta$  161.0, 158.0, 150.9, 150.1, 132.0, 131.4, 125.7, 125.4, 124.9, 122.4, 120.6, 120.3, 117.6, 117.2, 103.8, 99.6, 90.5, 23.8; HRMS (EI)  $m/z$  calcd for C<sub>18</sub>H<sub>12</sub>O<sub>5</sub> [M<sup>+</sup>] 308.0685, found 308.0686.

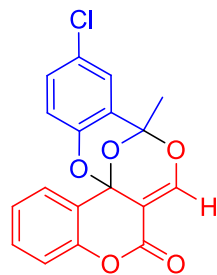

11-Chloro-9-methyl-9,14*a*-epoxybenzo[7,8][1,5]dioxocino[3,2-*c*]chromen-6(9*H*)-one (**4b**); Off-white solid;  $R_f = 0.55$  (30% EtOAc/hexanes); 53 mg; yield 65%; mp 175–177 °C (lit,<sup>1</sup> 178–179 °C); <sup>1</sup>H NMR (CDCl<sub>3</sub>, 400 MHz)  $\delta$  7.79 (s, 1H), 7.77 (d,  $J = 7.6$  Hz, 1H), 7.51 (t,  $J = 7.6$  Hz, 1H), 7.37 (d,  $J = 2.4$  Hz, 1H), 7.31–7.26 (m, 2H), 7.21 (d,  $J = 8.4$  Hz, 1H), 6.83 (d,  $J = 8.4$  Hz, 1H), 2.08 (s, 3H); <sup>13</sup>C{<sup>1</sup>H} NMR (CDCl<sub>3</sub>, 100 MHz)  $\delta$  160.7, 157.8, 151.0, 148.8, 132.3, 131.6, 127.5, 125.8, 125.5, 125.1, 122.1, 120.0, 118.9, 117.7, 103.9, 99.1, 90.8, 23.9; HRMS (EI)  $m/z$  calcd for C<sub>18</sub>H<sub>11</sub>ClO<sub>5</sub> [M<sup>+</sup>] 342.0295, found 342.0294.

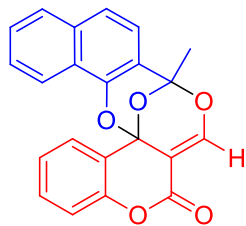

9-Methyl-9,16*a*-epoxynaphtho[2',1':7,8][1,5]dioxocino[3,2-*c*]chromen-6(9*H*)-one (**4c**); Off-white solid;  $R_f = 0.50$  (30% EtOAc/hexanes); 59 mg; yield 69%; mp 181–183 °C;  $^1\text{H NMR}$  ( $\text{CDCl}_3$ , 400 MHz)  $\delta$  8.01 (d,  $J = 8.4$  Hz, 1H), 7.86 (d,  $J = 7.6$  Hz, 1H), 7.82 (s, 1H), 7.79 (d,  $J = 8.4$  Hz, 1H), 7.56–7.51 (m, 3H), 7.44 (t,  $J = 7.6$  Hz, 1H), 7.40 (d,  $J = 8.4$  Hz, 1H), 7.33 (t,  $J = 7.6$  Hz, 1H), 7.26 (d,  $J = 8.4$  Hz, 1H), 2.16 (s, 3H);  $^{13}\text{C}\{^1\text{H}\}$  NMR ( $\text{CDCl}_3$ , 100 MHz)  $\delta$  161.0, 158.1, 151.1, 146.4, 134.8, 132.0, 127.8, 127.6, 126.4, 125.6, 124.9, 123.9, 122.2, 122.1, 121.7, 120.4, 117.6, 114.4, 103.9, 99.9, 90.9, 23.7; HRMS (EI)  $m/z$  calcd for  $\text{C}_{22}\text{H}_{14}\text{O}_5$  [ $\text{M}^+$ ] 358.0841, found 358.0836.

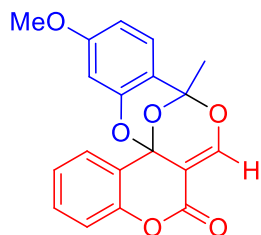

12-Methoxy-9-methyl-9,14*a*-epoxybenzo[7,8][1,5]dioxocino[3,2-*c*]chromen-6(9*H*)-one (**4d**); Off-white solid;  $R_f = 0.45$  (30% EtOAc/hexanes); 47 mg; yield 58%; mp 172–174 °C;  $^1\text{H NMR}$  ( $\text{CDCl}_3$ , 400 MHz)  $\delta$  7.79–7.77 (m, 2H), 7.49 (td,  $J = 8.4, 1.6$  Hz, 1H), 7.30–7.26 (m, 2H), 7.20 (d,  $J = 8.4$  Hz, 1H), 6.63 (dd,  $J = 8.8, 2.4$  Hz, 1H), 6.38 (d,  $J = 2.4$  Hz, 1H) 3.75 (s, 3H), 2.06 (s, 3H);  $^{13}\text{C}\{^1\text{H}\}$  NMR ( $\text{CDCl}_3$ , 100 MHz)  $\delta$  162.0, 161.1, 158.1, 151.5, 151.0, 132.0, 126.8, 125.4, 125.0, 120.5, 117.6, 113.0, 110.2, 103.7, 101.7, 100.0, 90.8, 55.6, 24.0; HRMS (EI)  $m/z$  calcd for  $\text{C}_{19}\text{H}_{14}\text{O}_6$  [ $\text{M}^+$ ] 338.0790, found 338.0784.

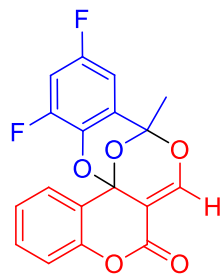

11,13-Difluoro-9-methyl-9,14*a*-epoxybenzo[7,8][1,5]dioxocino[3,2-*c*]chromen-6(9*H*)-one (**4e**); Off-white solid;  $R_f = 0.55$  (30% EtOAc/hexanes); 55 mg; yield 67%; mp 175–177 °C;  $^1\text{H NMR}$  ( $\text{CDCl}_3$ , 400 MHz)  $\delta$  7.80 (s, 1H), 7.77 (dd,  $J = 8.0, 1.6$  Hz, 1H), 7.51 (td,  $J = 8.0, 1.6$  Hz, 1H), 7.29 (td,  $J = 8.0, 0.8$  Hz, 1H), 7.20 (dd,  $J = 8.0, 0.8$  Hz, 1H), 6.95–6.90 (m, 2H), 2.07 (s, 3H);  $^{13}\text{C}\{^1\text{H}\}$  NMR ( $\text{CDCl}_3$ , 100 MHz)  $\delta$  160.6, 157.8, 156.5 (dd,  $J_{\text{C-F}} = 242.8, 10.2$  Hz, 1C), 151.1, 151.0 (dd,  $J_{\text{C-F}} = 250, 10.2$  Hz, 1C) 135.7 (dd,  $J_{\text{C-F}} = 12.7, 3.0$  Hz, 1C), 132.4, 125.6, 125.1, 123.1 (dd,  $J_{\text{C-F}} = 8.3, 3.0$  Hz, 1C), 119.4, 117.8, 107.4 (dd,  $J_{\text{C-F}} = 24.0, 4.0$  Hz, 1C), 106.9 (dd,  $J_{\text{C-F}} = 26.8, 21.2$  Hz, 1C), 103.8, 98.7, 91.0, 23.9; HRMS (EI)  $m/z$  calcd for  $\text{C}_{18}\text{H}_{10}\text{F}_2\text{O}_5$  [ $\text{M}^+$ ] 344.0496, found 344.0496.



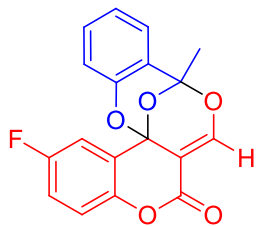

2-Fluoro-9-methyl-9,14*a*-epoxybenzo[7,8][1,5]dioxocino[3,2-*c*]chromen-6(9*H*)-one (**4f**); Off-white solid;  $R_f = 0.50$  (30% EtOAc/hexanes); 35 mg; yield 45%; mp 178–180 °C;  $^1\text{H}$  NMR ( $\text{CDCl}_3$ , 400 MHz)  $\delta$  7.80 (s, 1H), 7.47 (dd,  $J = 7.6, 2.0$  Hz, 1H), 7.38 (d,  $J = 7.6$  Hz, 1H), 7.34 (t,  $J = 7.6$ , 1H), 7.20–7.18 (m, 2H), 7.09 (t,  $J = 7.6$  Hz, 1H), 6.88 (d,  $J = 7.6$  Hz, 1H), 2.09 (s, 3H);  $^{13}\text{C}\{^1\text{H}\}$  NMR ( $\text{CDCl}_3$ , 100 MHz)  $\delta$  160.8, 159.3 (d,  $J_{\text{C-F}} = 244$ , 1C), 158.4, 149.9, 147.1 (d,  $J_{\text{C-F}} = 9.6$  Hz, 1C), 131.7, 125.9, 122.7, 121.8 (d,  $J_{\text{C-F}} = 8.0$  Hz, 1C), 120.5, 119.3 (d,  $J_{\text{C-F}} = 8.2$  Hz, 1C), 119.1 (d,  $J_{\text{C-F}} = 23.9$  Hz, 1C), 117.3, 112.2 (d,  $J_{\text{C-F}} = 25.1$  Hz, 1C), 103.3, 99.8, 90.3, 23.9; HRMS (EI)  $m/z$  calcd for  $\text{C}_{18}\text{H}_{11}\text{FO}_5$  [ $\text{M}^+$ ] 326.0591, 326.0583.

#### 4. General Synthetic Procedure and spectroscopic data of **5a–f**:

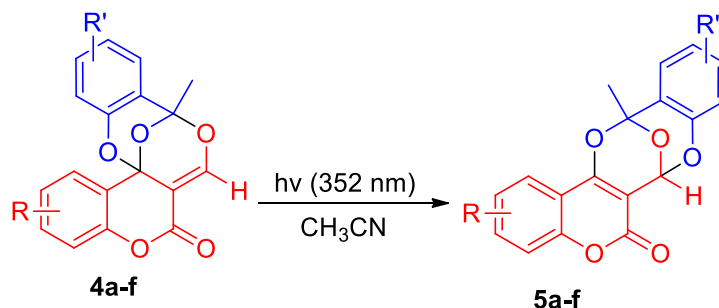

To a solution of **4** (0.065 mmol) in 20 mL of acetonitrile was taken in a quartz tube, and was irradiated with UV light (352 nm) in a Rayonet reactor (PR-2000). The reaction was monitored by TLC. After the completion of the reaction about 40 min, the solvent was evaporated under vacuum to obtain the photogenerated product **5a–f**.

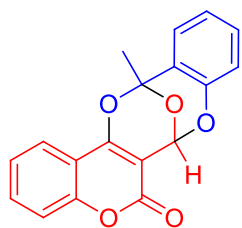

13-Methyl-7,13-dihydro-6*H*-7,13-epoxybenzo[6,7][1,5]dioxocino[3,2-*c*]chromen-6-one (**5a**); Off-white solid;  $R_f = 0.55$  (30% EtOAc/hexanes); 19.8 mg; yield 99%; mp 162–164 °C;  $^1\text{H NMR}$  ( $\text{CDCl}_3$ , 400 MHz)  $\delta$  7.79 (d,  $J = 8.0$  Hz, 1H), 7.55 (t,  $J = 8.0$  Hz, 1H), 7.38 (d,  $J = 8.0$  Hz, 1H), 7.32–7.26 (m, 3H), 7.04–6.99 (m, 2H), 6.42 (s, 1H), 2.13 (s, 3H);  $^{13}\text{C}\{^1\text{H}\}$  NMR ( $\text{CDCl}_3$ , 100 MHz)  $\delta$  160.9, 160.0, 153.7, 150.0, 133.4, 131.5, 126.0, 124.3, 123.1, 122.2, 121.1, 117.6, 117.2, 114.1, 99.6, 98.5, 87.8, 24.3; HRMS (EI)  $m/z$  calcd for  $\text{C}_{18}\text{H}_{12}\text{O}_5$  [ $\text{M}^+$ ] 308.0685, 308.0677.

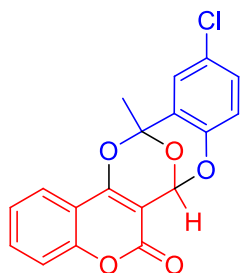

11-Chloro-13-methyl-7,13-dihydro-6*H*-7,13-epoxybenzo[6,7][1,5]dioxocino[3,2-*c*]chromen-6-one (**5b**); Off-white solid;  $R_f = 0.50$  (30% EtOAc/hexanes); 21.6 mg; yield 98%; mp 180–182 °C;  $^1\text{H NMR}$  ( $\text{CDCl}_3$ , 400 MHz)  $\delta$  7.80 (d,  $J = 7.6$  Hz, 1H), 7.58 (t,  $J = 7.6$  Hz, 1H), 7.35 (d,  $J = 2.4$  Hz, 1H), 7.32–7.29 (m, 2H), 7.27–7.24 (m, 2H), 6.98 (d,  $J = 8.8$  Hz, 1H), 6.42 (s, 1H), 2.11 (s, 3H);  $^{13}\text{C}\{^1\text{H}\}$  NMR ( $\text{CDCl}_3$ , 100 MHz)  $\delta$  160.8, 159.8, 153.7, 148.6, 133.6, 131.6, 127.2, 125.8, 124.5, 123.1, 122.4, 119.2, 117.2, 113.8, 99.3, 97.9, 87.8, 24.2; HRMS (EI)  $m/z$  calcd for  $\text{C}_{18}\text{H}_{11}\text{ClO}_5$  [ $\text{M}^+$ ] 342.0295, found 342.0300.

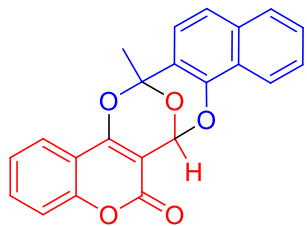

15-Methyl-7,15-dihydro-6*H*-7,15-epoxynaphtho[1',2':6,7][1,5]dioxocino[3,2-*c*]chromen-6-one (**5c**); Off-white solid;  $R_f = 0.45$  (30% EtOAc/hexanes); 21.8 mg; yield 95%; mp 178–180 °C;  $^1\text{H NMR}$  ( $\text{CDCl}_3$ , 400 MHz)  $\delta$  8.30 (s, 1H), 7.80–7.73 (m, 2H), 7.51–7.46 (m, 3H), 7.44–7.38 (m, 2H), 7.25–7.20 (m, 2H), 6.64 (s, 1H), 2.19 (s, 3H);  $^{13}\text{C}\{^1\text{H}\}$  NMR ( $\text{CDCl}_3$ , 100 MHz)  $\delta$  161.0, 159.9, 153.6, 146.4, 134.7, 133.3, 127.9, 127.5, 126.6, 124.3, 124.2, 123.0, 122.5, 121.9 (2C), 117.1, 114.7, 114.0, 99.7, 98.7, 88.1, 24.1; HRMS (EI)  $m/z$  calcd for  $\text{C}_{22}\text{H}_{14}\text{O}_5$  [ $\text{M}^+$ ] 358.0841, found 358.0848.

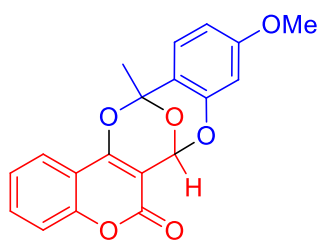

10-Methoxy-13-methyl-7,13-dihydro-6*H*-7,13-epoxybenzo[6,7][1,5]dioxocino[3,2-*c*]chromen-6-one (**5d**); Off-white solid;  $R_f = 0.40$  (30% EtOAc/hexanes); 20.8 mg; yield 96%; mp 169–171 °C;  $^1\text{H NMR}$  ( $\text{CDCl}_3$ , 400 MHz)  $\delta$  7.78 (td,  $J = 8.4, 2.0$  Hz, 1H), 7.54 (td,  $J = 8.4, 1.2$  Hz, 1H), 7.28–7.24 (m, 4H), 6.56 (dd,  $J = 8.4, 2.4$  Hz, 1H), 6.52 (d,  $J = 2.4$  Hz, 1H), 6.39 (s, 1H), 3.74 (s, 3H), 2.10 (s, 3H);  $^{13}\text{C}\{^1\text{H}\}$  NMR ( $\text{CDCl}_3$ , 100 MHz)  $\delta$  161.9, 160.9, 160.1, 153.6, 151.3, 133.3, 126.8, 124.3, 123.0, 117.1, 114.2, 113.3, 110.0, 101.2, 99.5, 98.8, 87.9, 55.5, 24.3; HRMS (EI)  $m/z$  calcd for  $\text{C}_{19}\text{H}_{14}\text{O}_6$  [ $\text{M}^+$ ] 338.0790, found 338.0780.

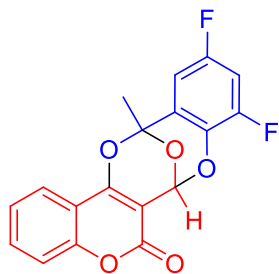

9,11-Difluoro-13-methyl-7,13-dihydro-6*H*-7,13-epoxybenzo[6,7][1,5]dioxocino[3,2-*c*]chromen-6-one (**5e**); Off-white solid;  $R_f = 0.50$  (30% EtOAc/hexanes); 21.8 mg; yield 99%; mp 181–183 °C;  $^1\text{H NMR}$  ( $\text{CDCl}_3$ , 400 MHz)  $\delta$  7.78 (dd,  $J = 8.4, 1.6$  Hz, 1H), 7.59 (td,  $J = 8.4, 1.6$  Hz, 1H), 7.32–7.27 (m, 2H), 6.93–6.86 (m, 2H), 6.50 (s, 1H), 2.11 (s, 3H);  $^{13}\text{C}\{^1\text{H}\}$  NMR ( $\text{CDCl}_3$ , 100 MHz)  $\delta$  160.7, 159.4, 156.5 (dd,  $J_{\text{C-F}} = 242.5, 10.1$  Hz, 1C), 153.7, 151.0 (dd,  $J_{\text{C-F}} = 252, 11.8$  Hz, 1C), 135.5 (d,  $J_{\text{C-F}} = 9.6$  Hz, 1C), 133.8, 124.5, 123.4 (d,  $J_{\text{C-F}} = 8.2$  Hz, 1C), 123.0, 117.3, 113.7, 107.4 (dd,  $J_{\text{C-F}} = 23.8, 4.0$  Hz, 1C), 106.9 (dd,  $J_{\text{C-F}} = 26.8, 21.1$  Hz, 1C), 99.0, 97.4, 87.9, 24.2; HRMS (EI)  $m/z$  calcd for  $\text{C}_{18}\text{H}_{10}\text{F}_2\text{O}_5$  [ $\text{M}^+$ ] 344.0496, found 344.0491.

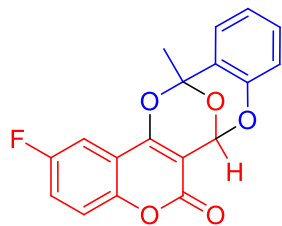

2-Fluoro-13-methyl-7,13-dihydro-6H-7,13-epoxybenzo[6,7][1,5]dioxocino[3,2-c]chromen-6-one (**5f**); Off-white solid;  $R_f = 0.45$  (30% EtOAc/hexanes); 20.6 mg; yield 98%; mp 175–177 °C;  $^1\text{H NMR}$  ( $\text{CDCl}_3$ , 400 MHz)  $\delta$  7.45 (d,  $J = 7.6$  Hz, 1H), 7.39 (dd,  $J = 8.4, 1.6$  Hz, 1H), 7.31 (td,  $J = 8.0, 1.2$  Hz, 1H), 7.27–7.25 (m, 2H), 7.04–7.00 (m, 2H), 6.41 (s, 1H), 2.13 (s, 3H);  $^{13}\text{C}\{^1\text{H}\}$  NMR ( $\text{CDCl}_3$ , 100 MHz)  $\delta$  160.2, 160.1, 159.6, 158.8 (d,  $J_{\text{C-F}} = 243.7$  Hz, 1C), 149.8 (d,  $J_{\text{C-F}} = 7.6$  Hz, 1C), 131.6, 126.0, 122.3, 120.9 (d,  $J_{\text{C-F}} = 24.3$  Hz, 1C), 120.8, 118.9 (d,  $J_{\text{C-F}} = 8.2$  Hz, 1C), 117.6, 115.0 (d,  $J_{\text{C-F}} = 9.1$  Hz, 1C), 108.8 (d,  $J_{\text{C-F}} = 25.2$  Hz, 1C), 100.3, 98.9, 87.6, 24.2; HRMS (EI)  $m/z$  calcd for  $\text{C}_{18}\text{H}_{11}\text{FO}_5$  [ $\text{M}^+$ ] 326.0591, found 326.0598.

## 5. General Synthetic Procedure and spectroscopic data of **7a–h**:

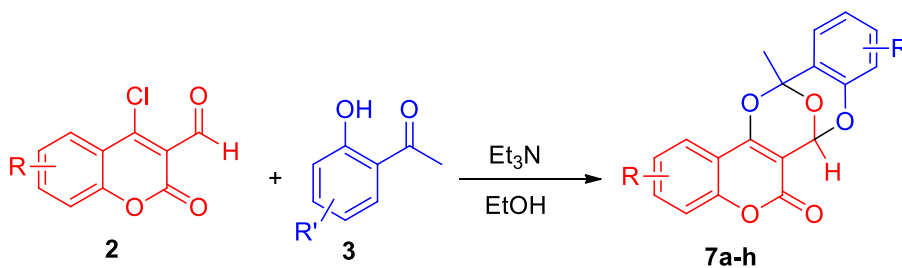

To a solution of appropriately substituted 4-chloro-3-formylcoumarin **2** (0.24 mmol) in EtOH (2 mL) was sequentially added appropriately substituted *o*-hydroxyacetophenones **3** (0.24 mmol) and triethylamine (0.24 mmol) at room temperature. The mixture was then stirred at room temperature for 12 hours. The resulting precipitate was filtered, washed with ethanol and hexanes: dichloromethane (9:1), and dried under vacuum to obtain the desired product **7a–h**.

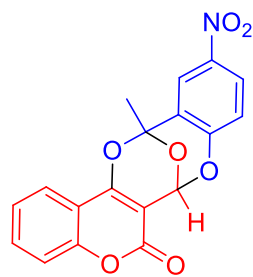

13-Methyl-11-nitro-7,13-dihydro-6*H*-7,13-epoxybenzo[6,7][1,5]dioxocino[3,2-*c*]chromen-6-one (**7a**); Off-white solid;  $R_f = 0.50$  (30% EtOAc/hexanes); 52.5 mg; yield 62%; mp 196–198 °C;  $^1\text{H}$  NMR ( $\text{CDCl}_3$ , 400 MHz)  $\delta$  8.36 (d,  $J = 2.8$  Hz, 1H), 8.21 (dd,  $J = 8.8, 2.4$  Hz, 1H), 7.87 (d,  $J = 7.6$  Hz, 1H), 7.60 (t,  $J = 7.6$  Hz, 1H), 7.35–7.30 (m, 2H), 7.16 (d,  $J = 8.8$  Hz, 1H), 6.53 (s, 1H), 2.20 (s, 3H);  $^{13}\text{C}\{^1\text{H}\}$  NMR ( $\text{CDCl}_3$ , 100 MHz)  $\delta$  160.8, 159.5, 155.3, 153.8, 142.4, 134.0, 127.1, 124.7, 123.2, 122.7, 121.8, 118.8, 117.3, 113.5, 99.0, 97.7, 88.3, 24.3; HRMS (EI)  $m/z$  calcd for  $\text{C}_{18}\text{H}_{11}\text{NO}_7$  [ $\text{M}^+$ ] 353.0536, found 353.0538.

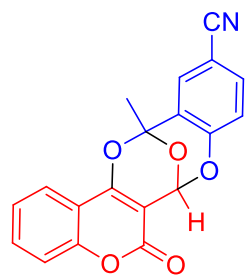

13-Methyl-6-oxo-7,13-dihydro-6*H*-7,13-epoxybenzo[6,7][1,5]dioxocino[3,2-*c*]chromene-11-carbonitrile (**7b**); Off-white solid;  $R_f = 0.45$  (30% EtOAc/hexanes); 51 mg; yield 64%; mp 191–193 °C;  $^1\text{H}$  NMR ( $\text{CDCl}_3$ , 400 MHz)  $\delta$  7.80 (d,  $J = 7.6$  Hz, 1H), 7.73 (s, 1H), 7.62–7.57 (m, 2H), 7.35–7.30 (m, 2H), 7.13 (d,  $J = 8.4$  Hz, 1H), 6.49 (s, 1H), 2.15 (s, 3H);  $^{13}\text{C}\{^1\text{H}\}$  NMR ( $\text{CDCl}_3$ , 100 MHz)  $\delta$  160.8, 159.5, 153.7, 153.6, 135.0, 133.9, 130.9, 124.7, 123.1, 122.5, 119.1, 118.2, 117.3, 113.6, 106.0, 99.1, 97.5, 88.1, 24.2; HRMS (EI)  $m/z$  calcd for  $\text{C}_{19}\text{H}_{11}\text{NO}_5$  [ $\text{M}^+$ ] 333.0637, found 333.0645.

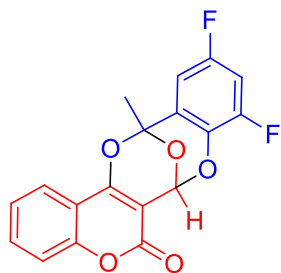

9,11-Difluoro-13-methyl-7,13-dihydro-6*H*-7,13-epoxybenzo[6,7][1,5]dioxocino[3,2-*c*]chromen-6-one (**7c**); Off-white solid;  $R_f = 0.50$  (30% EtOAc/hexanes); 52 mg; yield 63%; mp 181–183 °C;

\*\*[NOTE: Compound **7c** is same as **5e**, for spectral detail look for **5e**]

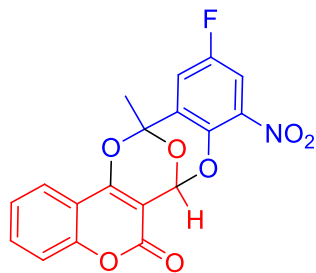

11-Fluoro-13-methyl-9-nitro-7,13-dihydro-6*H*-7,13-epoxybenzo[6,7][1,5]dioxocino[3,2-*c*]chromen-6-one (**7d**); Off-white solid;  $R_f = 0.55$  (30% EtOAc/hexanes); 61.2 mg; yield 69%; mp 199–201 °C;  $^1\text{H}$  NMR ( $\text{CDCl}_3$ , 400 MHz)  $\delta$  7.78 (dd,  $J = 8.4, 1.6$  Hz, 1H), 7.73 (dd,  $J = 7.6, 3.2$  Hz, 1H), 7.61 (td,  $J = 8.4, 1.6$  Hz 1H), 7.41 (dd,  $J = 7.6, 3.2$  Hz 1H), 7.34–7.30 (m, 2H), 6.60 (s, 1H), 2.16 (s, 3H);

$^{13}\text{C}\{^1\text{H}\}$  NMR ( $\text{CDCl}_3$ , 100 MHz)  $\delta$  160.8, 158.9, 155.4 (d,  $J_{\text{C-F}} = 245.5$  Hz, 1C), 153.9, 141.3, 134.1, 125.4, 124.6, 123.0, 119.2, 118.2 (d,  $J_{\text{C-F}} = 23.9$  Hz, 1C), 117.4, 115.4 (d,  $J_{\text{C-F}} = 27.2$  Hz, 1C), 113.3, 98.8, 97.2, 88.4, 24.5; HRMS (EI)  $m/z$  calcd for  $\text{C}_{18}\text{H}_{10}\text{FNO}_7$  [ $\text{M}^+$ ] 371.0441, found 371.0439.

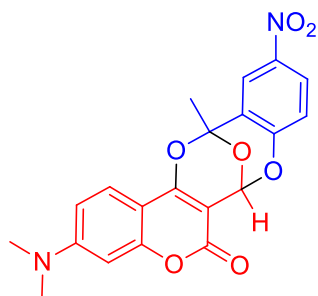

3-(Dimethylamino)-13-methyl-11-nitro-7,13-dihydro-6*H*-7,13-epoxybenzo[6,7][1,5]dioxocino[3,2-*c*]chromen-6-one (**7e**); Light yellow solid;  $R_f = 0.40$  (40% EtOAc/hexanes); 43 mg; yield 45%; mp 201–203 °C;  $^1\text{H}$  NMR ( $\text{CDCl}_3$ , 400 MHz)  $\delta$  8.34 (d,  $J = 2.8$  Hz, 1H), 8.19 (dd,  $J = 9.2, 2.8$  Hz, 1H), 7.57 (d,  $J = 8.8$  Hz, 1H), 7.14 (d,  $J = 9.2$  Hz, 1H), 6.61 (dd,  $J = 9.2, 2.4$  Hz, 2H), 6.50 (s, 1H), 6.42 (d,  $J = 2.4$  Hz, 1H), 3.05 (s, 6H), 2.15 (s, 3H);  $^{13}\text{C}\{^1\text{H}\}$  NMR ( $\text{CDCl}_3$ , 100 MHz)

$\delta$  161.4, 160.7, 156.1, 155.6, 154.4, 142.2, 126.8, 124.0, 122.7, 122.3, 118.8, 109.3, 101.7, 97.9, 97.1, 93.8, 89.0, 40.3 (2C), 24.4; HRMS (EI)  $m/z$  calcd for  $\text{C}_{20}\text{H}_{16}\text{N}_2\text{O}_7$  [ $\text{M}^+$ ] 396.0958, found 396.0964.

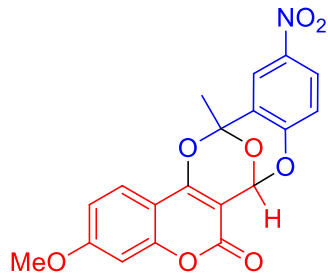

3-methoxy-13-methyl-11-nitro-7,13-dihydro-6H-7,13-epoxybenzo[6,7][1,5]dioxocino[3,2-c]chromen-6-one (**7f**); White solid;  $R_f = 0.55$  (40% EtOAc/hexanes); 47 mg; yield 51%; mp 200–202 °C;  $^1\text{H NMR}$  ( $\text{CDCl}_3$ , 400 MHz)  $\delta$  8.35 (d,  $J = 2.4$  Hz, 1H), 8.20 (dd,  $J = 8.8, 2.4$  Hz, 1H), 7.70 (d,  $J = 8.8$ , Hz 1H), 7.15 (d,  $J = 9.2$ , Hz 1H), 6.87 (dd,  $J = 9.2, 2.4$  Hz 1H) 6.76 (d,  $J = 2.4$  Hz, 1H) 6.50 (s, 1H), 3.86 (s, 3H), 2.18 (s, 3H);  $^{13}\text{C}\{^1\text{H}\}$  NMR ( $\text{CDCl}_3$ , 100 MHz)  $\delta$  164.6, 161.1, 159.9, 155.8, 155.4, 142.3, 127.0, 124.3, 122.7, 121.9, 118.8, 113.1, 106.5, 101.0, 97.5, 96.3, 88.6, 56.1, 24.3; HRMS (EI)  $m/z$  calcd for  $\text{C}_{19}\text{H}_{13}\text{NO}_8$  [ $\text{M}^+$ ] 383.0641, found 371.0647.

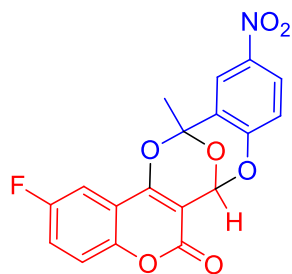

2-Fluoro-13-methyl-11-nitro-7,13-dihydro-6H-7,13-epoxybenzo[6,7][1,5]dioxocino[3,2-c]chromen-6-one (**7g**); Off-white solid;  $R_f = 0.50$  (30% EtOAc/hexanes); 54.5 mg; yield 61%; mp 175–177 °C;  $^1\text{H NMR}$  ( $\text{CDCl}_3$ , 400 MHz)  $\delta$  8.37 (s, 1H), 8.22 (d,  $J = 9.2$  Hz, 1H), 7.49 (d,  $J = 7.2$  Hz, 1H), 7.31 (d,  $J = 4.4$  Hz, 2H), 7.17 (d, 9.2 Hz, 1H), 6.52 (s, 1H), 2.21 (s, 3H);  $^{13}\text{C}\{^1\text{H}\}$  NMR ( $\text{CDCl}_3$ , 100 MHz)  $\delta$  160.2, 160.1, 160.0 (d,  $J_{\text{C-F}} = 242.6$  Hz, 1C), 155.1, 149.9, 142.5, 127.2, 122.7, 121.6 (d,  $J_{\text{C-F}} = 24.4$  Hz, 1C), 121.5, 119.1 (d,  $J_{\text{C-F}} = 8.0$  Hz, 1C), 118.8, 114.4 (d,  $J_{\text{C-F}} = 8.9$  Hz, 1C), 109.0 (d,  $J_{\text{C-F}} = 25.3$  Hz, 1C), 99.8, 98.0, 88.1, 24.2; HRMS (EI)  $m/z$  calcd for  $\text{C}_{18}\text{H}_{18}\text{FNO}_7$  [ $\text{M}^+$ ] 371.0441, found 371.0436.

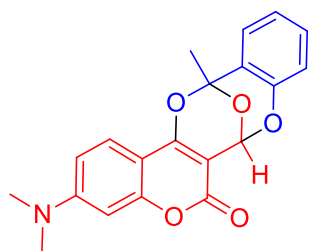

3-(Dimethylamino)-13-methyl-7,13-dihydro-6H-7,13-epoxybenzo[6,7][1,5]dioxocino[3,2-c]chromen-6-one (**7h**); Off-white solid;  $R_f = 0.45$  (40% EtOAc/hexanes); 46 mg; yield 54%; mp 187–189 °C;  $^1\text{H NMR}$  ( $\text{CDCl}_3$ , 400 MHz)  $\delta$  7.55 (d,  $J = 8.8$  Hz, 1H), 7.36 (d,  $J = 7.6$  Hz, 1H), 7.29–7.26 (m, 1H), 7.02–6.96 (m, 2H), 6.57 (d,  $J = 7.2$  Hz, 1H), 6.40 (s, 1H), 6.42 (d,  $J = 2.4$  Hz, 1H), 3.02 (s, 6H), 2.08 (s, 3H);  $^{13}\text{C}\{^1\text{H}\}$  NMR ( $\text{CDCl}_3$ , 100 MHz)  $\delta$  161.6, 161.1, 155.9, 154.0, 150.2, 131.1, 125.9, 123.8, 121.8, 121.7, 117.7, 109.0, 102.6, 97.9 (2C), 94.6, 88.4, 40.3 (2C), 24.5; HRMS (EI)  $m/z$  calcd for  $\text{C}_{20}\text{H}_{17}\text{NO}_5$  [ $\text{M}^+$ ] 351.1107, found 351.1104.

## 6. Reference:

- Jaggavarapu, S. R.; Kamalakaran, A. S.; Gayatri, G.; Shukla, M.; Dorai, K.; Gaddamanugu, G. *Tetrahedron* **2013**, *69*, 2142–2149.

## 7. Copies of $^1\text{H}$ and $^{13}\text{C}$ NMR spectra for **5a-f**, **6a-f**, and **7a-f**

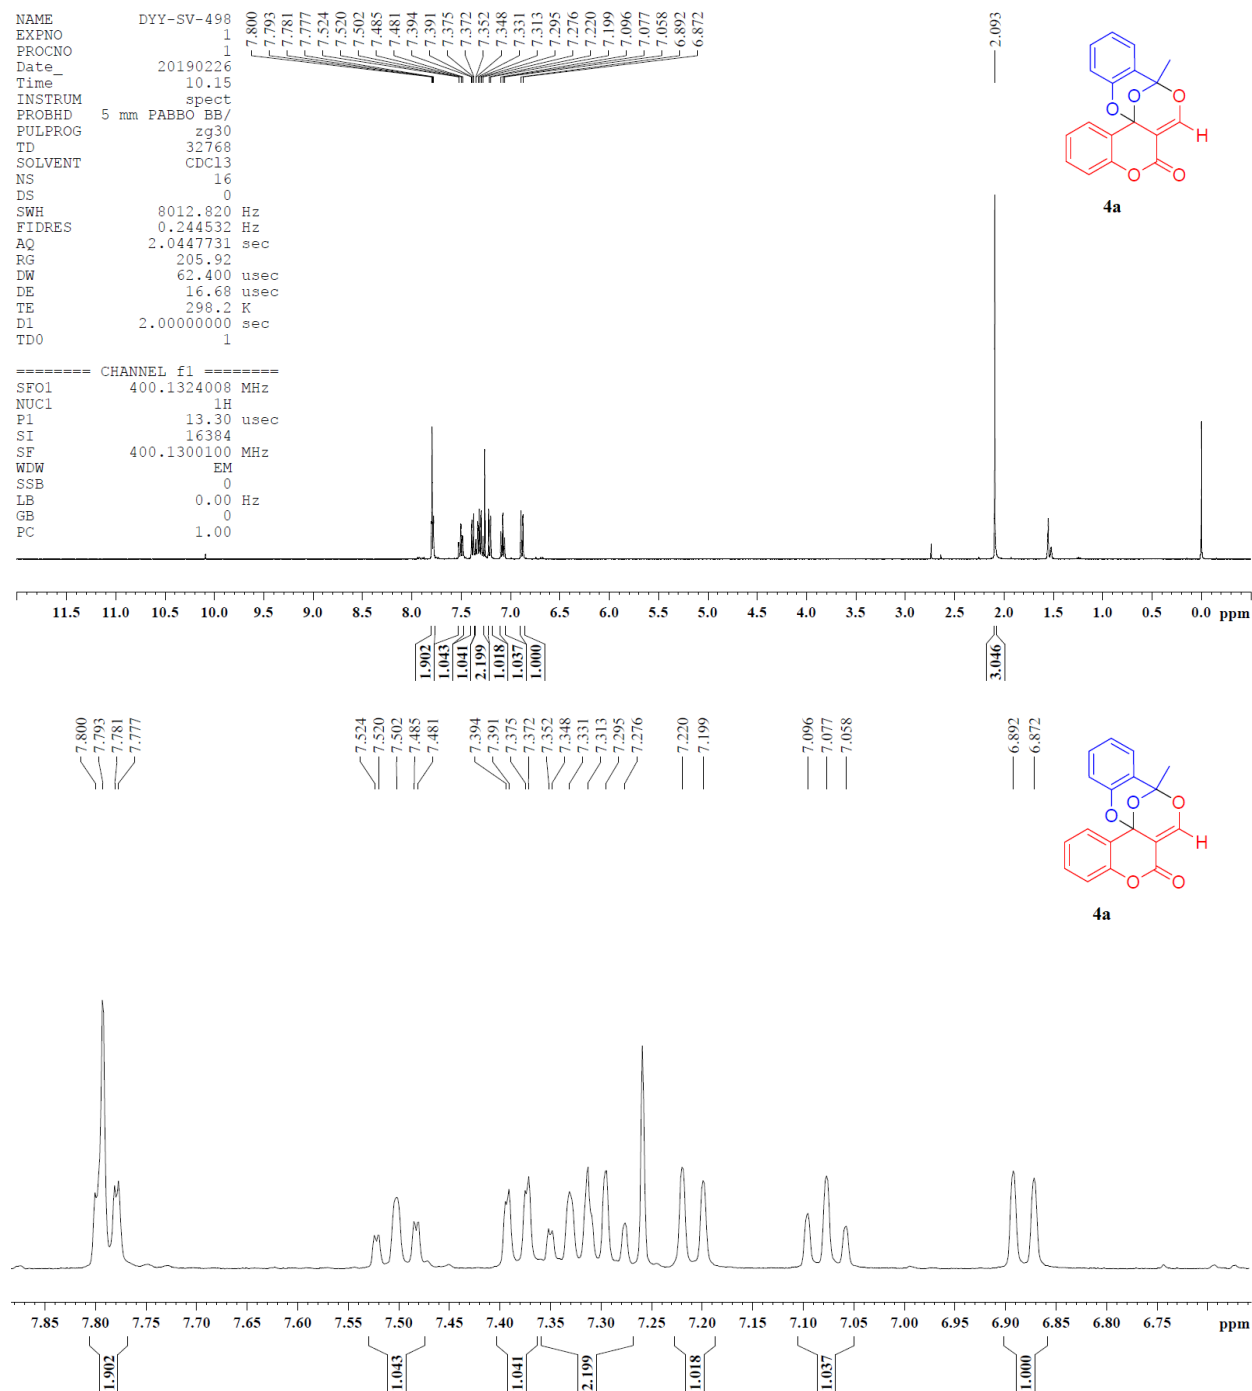



```

NAME      DYY-SV-498-C
EXPNO    1
PROCNO   1
Date_    20190516
Time     0.41
INSTRUM  spect
PROBHD   5 mm PABBO BB/
PULPROG  zgpg30
TD       32768
SOLVENT  CDC13
NS       2000
DS       0
SWH      24038.461 Hz
FIDRES   0.733596 Hz
AQ       0.6816244 sec
RG       205.92
DW       20.800 usec
DE       6.50 usec
TE       298.5 K
D1       2.00000000 sec
D11      0.03000000 sec
TD0      1

```

```

===== CHANNEL f1 =====
SFO1    100.6233329 MHz
NUC1     13C
P1      10.00 usec
SI      32768
SF      100.6127685 MHz
WDW     EM
SSB     0
LB      2.00 Hz
GB      0
PC      1.00

```

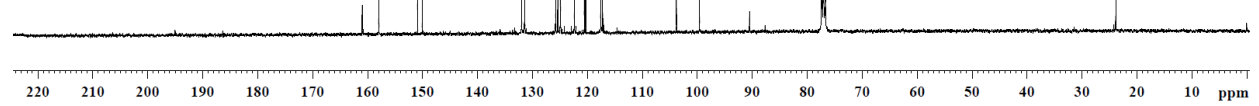

160.978  
 157.951  
 150.893  
 150.058  
 131.969  
 131.426  
 125.749  
 125.372  
 124.908  
 122.366  
 120.557  
 120.335  
 117.568  
 117.243  
 103.792  
 99.599  
 90.483

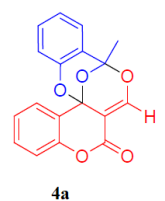

23.836

160.978  
 157.951  
 150.893  
 150.058  
 131.969  
 131.426  
 125.749  
 125.372  
 124.908  
 122.366  
 120.557  
 120.335  
 117.568  
 117.243  
 103.792  
 99.599  
 90.483

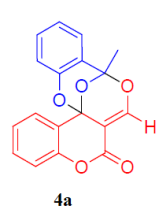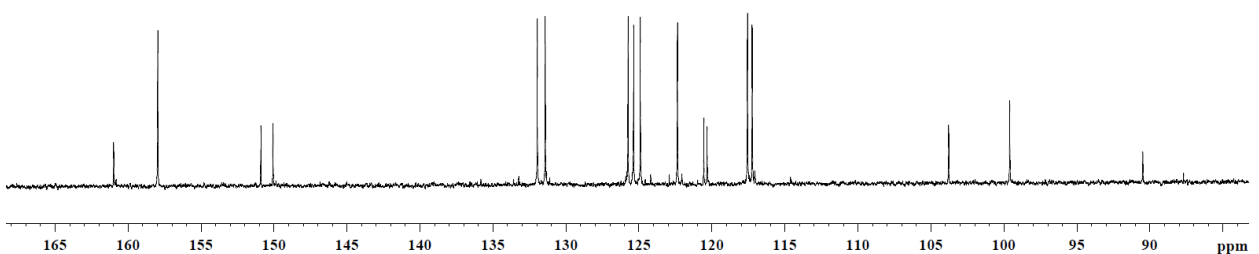

NAME DYY-SV-511  
 EXPNO 1  
 PROCNO 1  
 Date\_ 20190326  
 Time 10.24  
 INSTRUM spect  
 PROBHD 5 mm PABBO BB/  
 PULPROG zg30  
 TD 32768  
 SOLVENT CDCl3  
 NS 8  
 DS 0  
 SWH 8012.820 Hz  
 FIDRES 0.244532 Hz  
 AQ 2.0447731 sec  
 RG 163.06  
 DW 62.400 usec  
 DE 16.68 usec  
 TE 297.8 K  
 D1 2.00000000 sec  
 TDO 1

===== CHANNEL f1 =====  
 SFO1 400.1324008 MHz  
 NUC1 1H  
 FI 13.30 usec  
 SI 16384  
 SF 400.1300095 MHz  
 WDW EM  
 SSB 0  
 LB 0.00 Hz  
 GB 0  
 PC 1.00

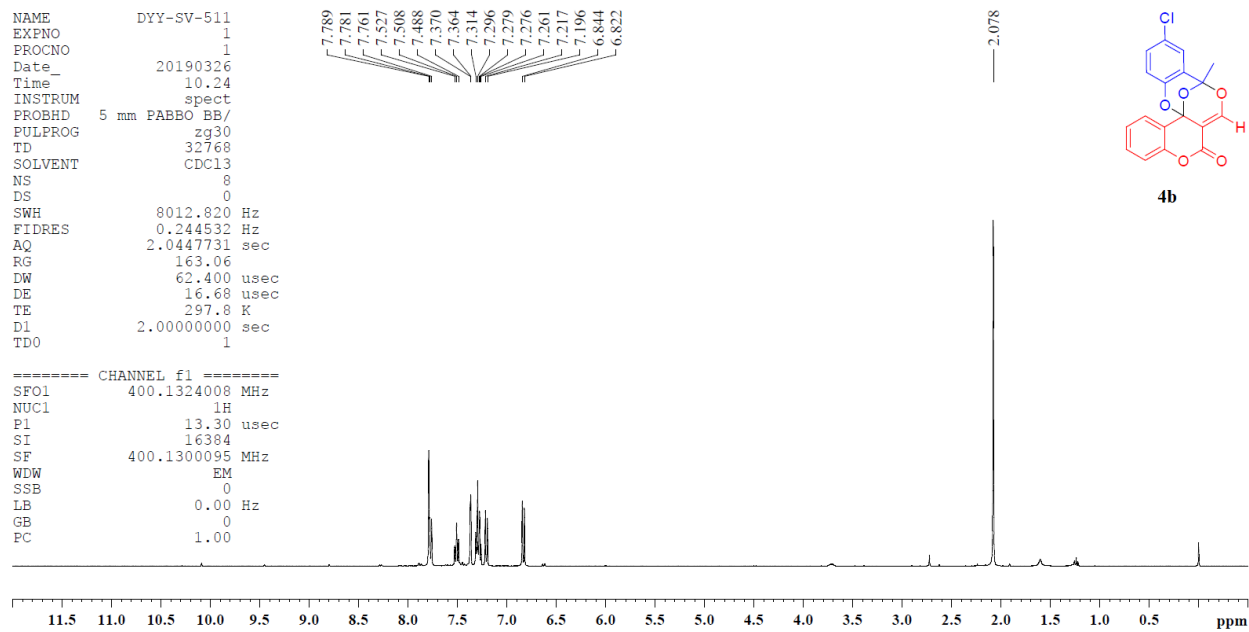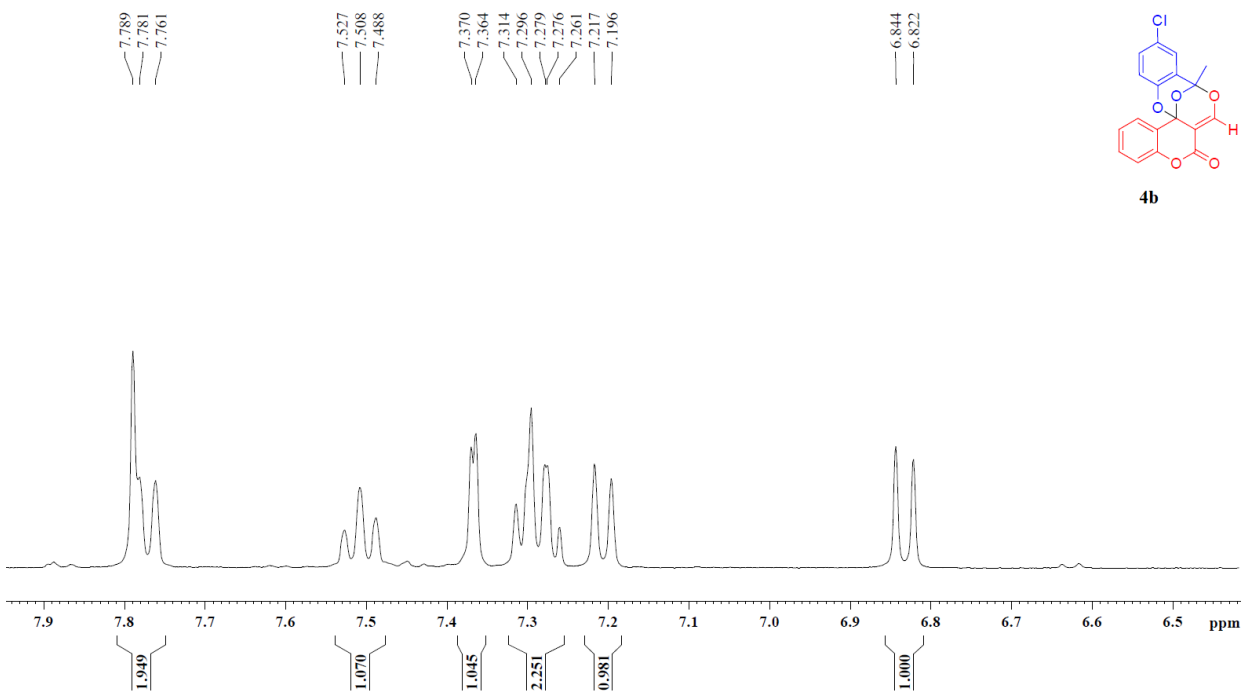

```

NAME      DYY-SV-511-C
EXPNO     1
PROCNO    1
Date_     20190326
Time      12.02
INSTRUM   spect
PROBHD    5 mm PABBO BB/
PULPROG   zgpg30
TD         32768
SOLVENT   CDC13
NS         1200
DS         0
SWH        24038.461 Hz
FIDRES     0.733596 Hz
AQ         0.6816244 sec
RG         205.92
DW         20.800 usec
DE         6.50 usec
TE         298.5 K
D1         2.00000000 sec
D11        0.03000000 sec
TDO        1

```

```

===== CHANNEL f1 =====
SFO1      100.6233329 MHz
NUC1      13C
P1        10.00 usec
SI        32768
SF        100.6127569 MHz
WDW       EM
SSB       0
LB        2.00 Hz
GB        0
PC        1.00

```

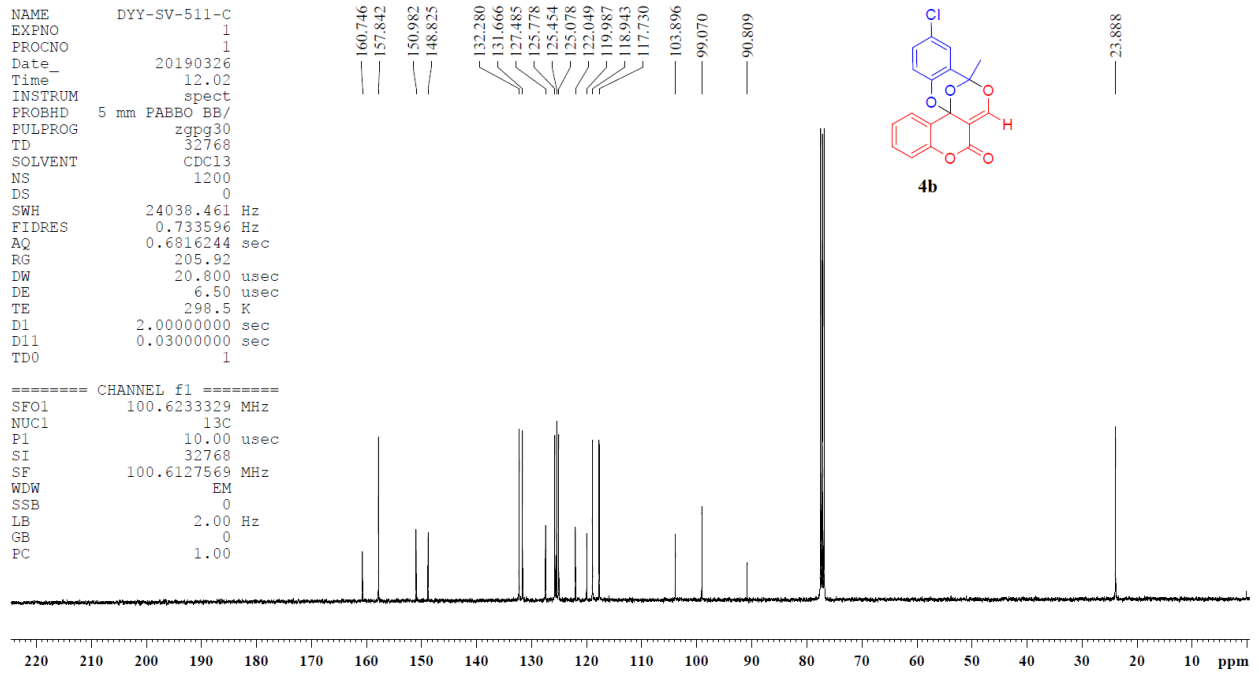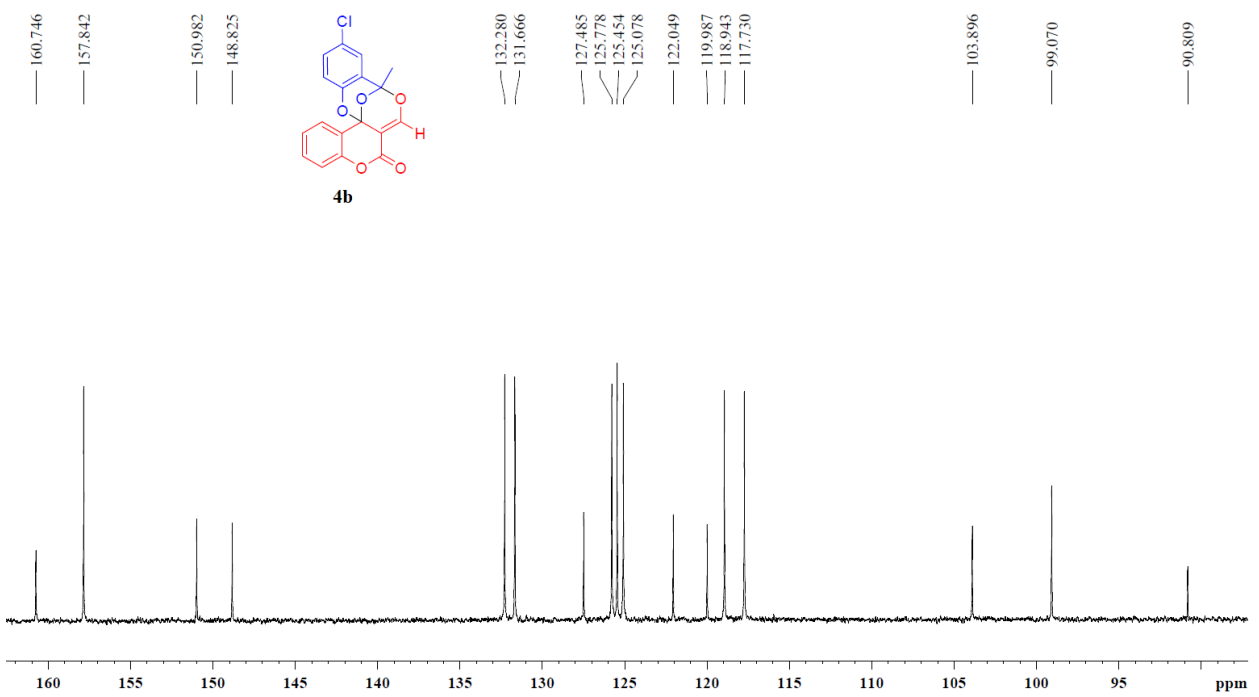

```

NAME          DYY-SV-505
EXPNO         1
PROCNO        1
Date_         20190319
Time_         10.31
INSTRUM       spect
PROBHD        5 mm PABBO BB/
PULPROG       zg30
TD            32768
SOLVENT       CDCl3
NS            8
DS            0
SWH           8012.820 Hz
FIDRES        0.244532 Hz
AQ            2.0447731 sec
RG            163.06
DW            62.400 usec
DE            16.68 usec
TE            297.6 K
D1            2.00000000 sec
TD0           1
  
```

```

===== CHANNEL f1 =====
SFO1          400.1324008 MHz
NUC1          1H
P1            13.30 usec
SI            16384
SF            400.1300124 MHz
WDW           EM
SSB           0
LB            0.00 Hz
GB            0
PC            1.00
  
```

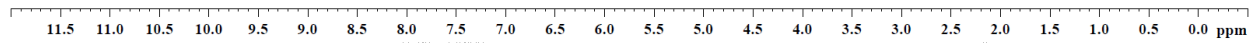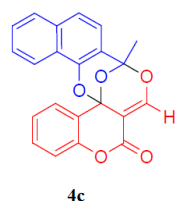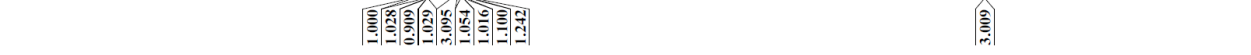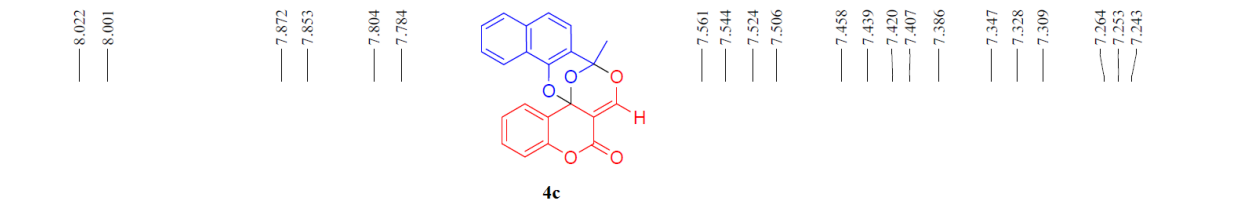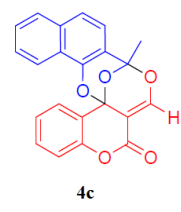

NAME DYI-SV-505-C  
 EXPNO 1  
 PROCNO 1  
 Date\_ 20190319  
 Time 13.06  
 INSTRUM spect  
 PROBHD 5 mm PABBO BB/  
 PULPROG zgpg30  
 TD 32768  
 SOLVENT CDCl3  
 NS 1600  
 DS 0  
 SWH 24038.461 Hz  
 FIDRES 0.733596 Hz  
 AQ 0.6816244 sec  
 RG 205.92  
 DW 20.800 usec  
 DE 6.50 usec  
 TE 299.1 K  
 D1 2.00000000 sec  
 D11 0.03000000 sec  
 TD0 1

===== CHANNEL f1 =====  
 SFO1 100.6233329 MHz  
 NUCL1 13C  
 P1 10.00 usec  
 SI 32768  
 SF 100.6127685 MHz  
 WDW EM  
 SSB 0  
 LB 2.00 Hz  
 GB 0  
 PC 1.00

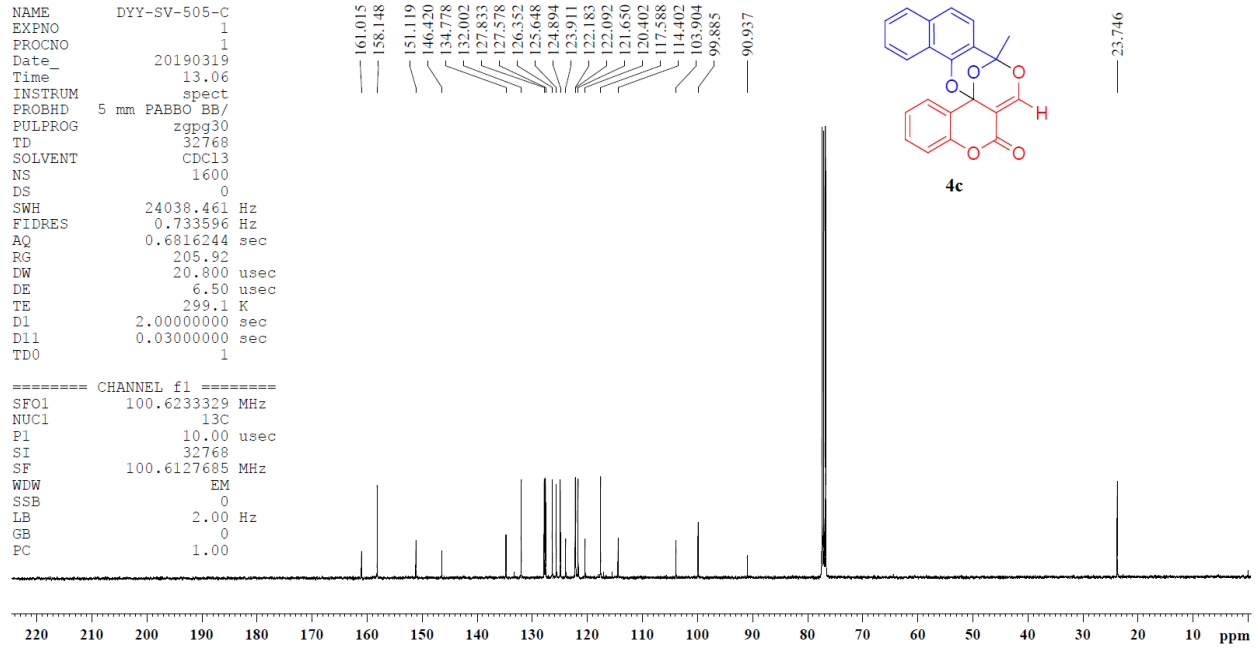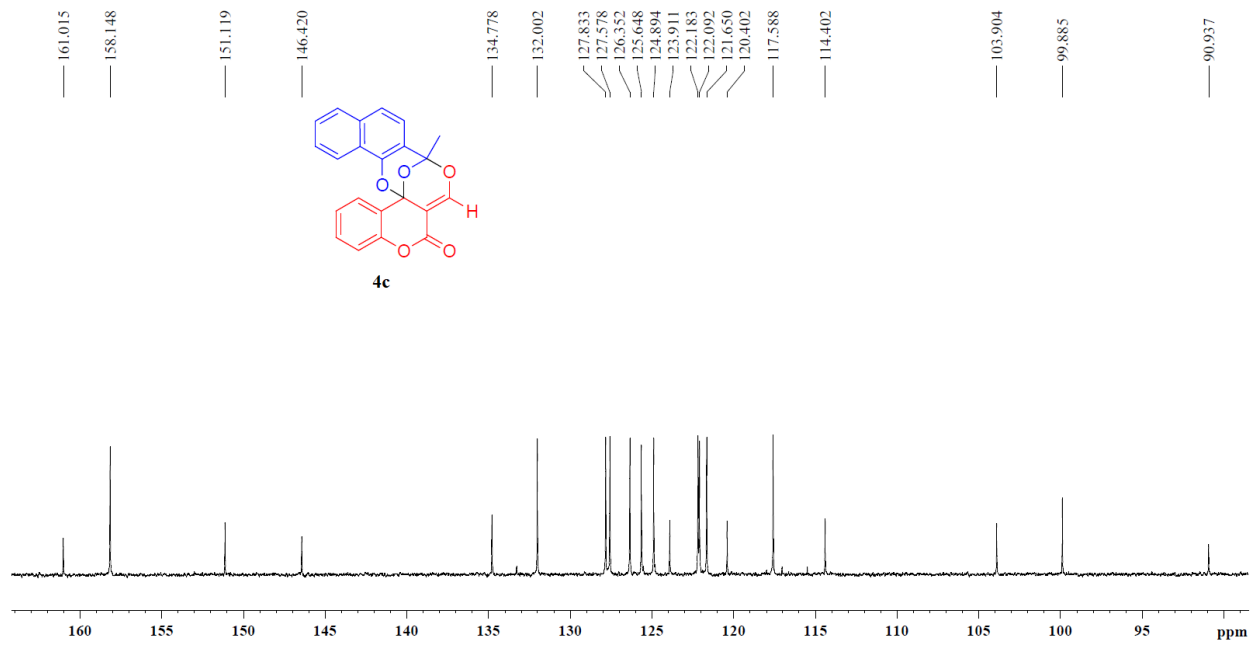

```

NAME      DYY-SV-593-1
EXPNO    1
PROCNO    1
Date_     20191122
Time      10.49
INSTRUM   spect
PROBHD    5 mm PABBO BB/
PULPROG   zg30
TD         32768
SOLVENT   CDC13
NS         16
DS         0
SWH        8012.820 Hz
FIDRES     0.244532 Hz
AQ         2.0447731 sec
RG         115.33
DW         62.400 usec
DE         16.68 usec
TE         300.0 K
D1         2.00000000 sec
TD0        1

```

```

===== CHANNEL f1 =====
SFO1      400.1324008 MHz
NUC1       1H
P1         13.30 usec
SI         16384
SF         400.1300095 MHz
WDW        EM
SSB        0
LB         0.00 Hz
GB         0
PC         1.00

```

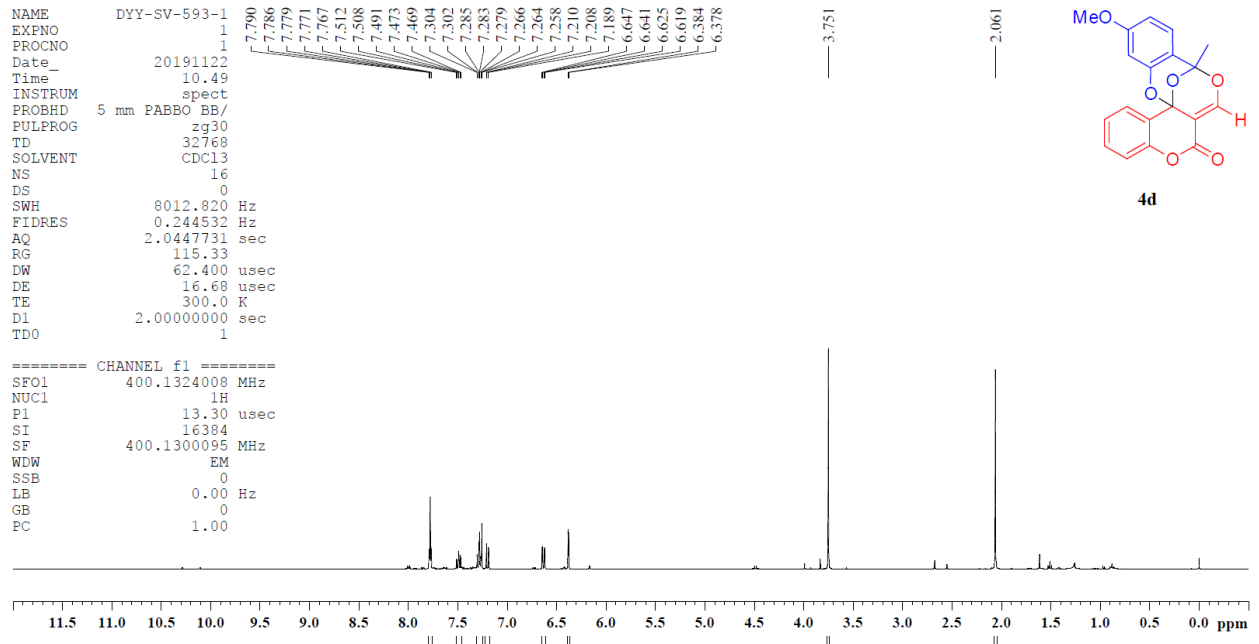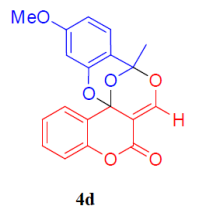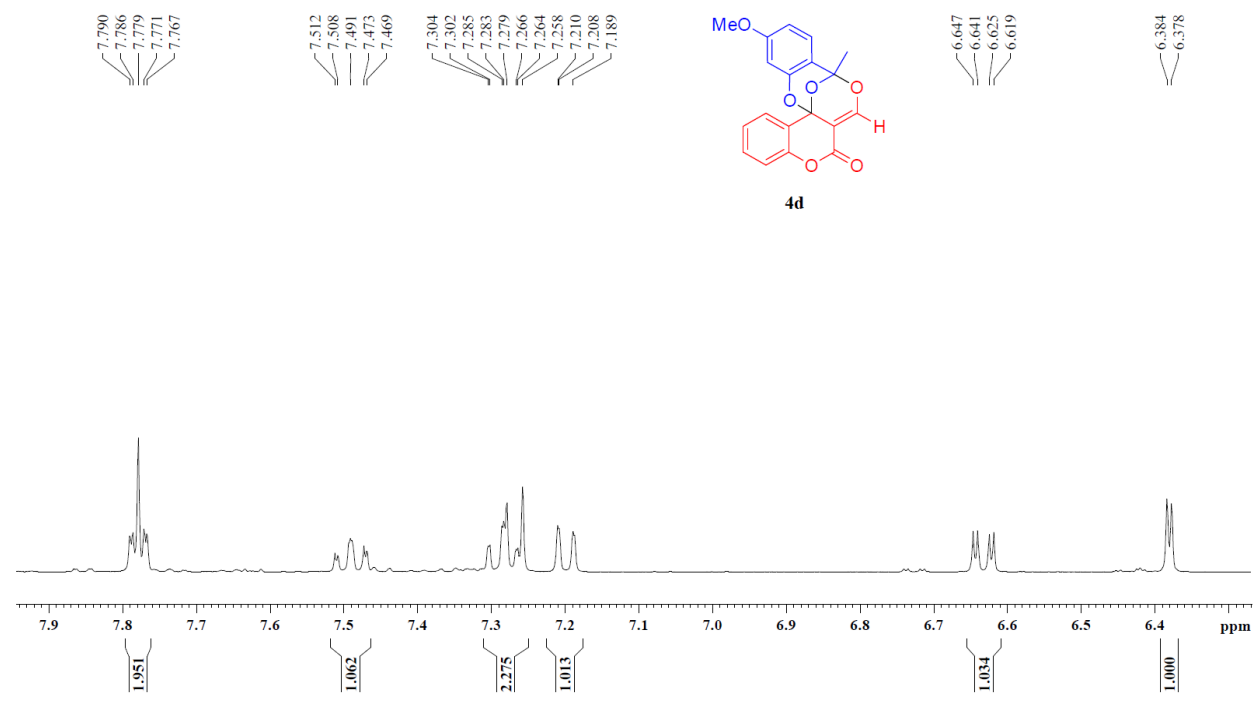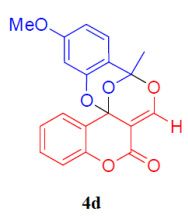

```

NAME      DYY-SV-593-C
EXPNO    1
PROCNO   1
Date_    20191124
Time     14.57
INSTRUM  spect
PROBHD   5 mm PABBO BB/
PULPROG  zgpg30
TD       32768
SOLVENT  CDCl3
NS       2400
DS       0
SWH      24038.461 Hz
FIDRES   0.733596 Hz
AQ       0.6816244 sec
RG       205.92
DW       20.800 usec
DE       6.50 usec
TE       300.0 K
D1       2.00000000 sec
D11      0.03000000 sec
TD0      1

```

```

162.007
161.116
158.101
151.458
151.016
132.044
126.768
125.429
124.985
120.452
117.643
113.026
110.160
103.748
101.104
99.971
90.781

```

```
55.580
```

```
23.998
```

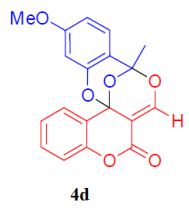

```

===== CHANNEL f1 =====
SF01    100.6233329 MHz
NUC1    13C
P1      10.00 usec
SI      32768
SF      100.6127581 MHz
WDW     EM
SSB     0
LB      2.00 Hz
GB      0
PC      1.00

```

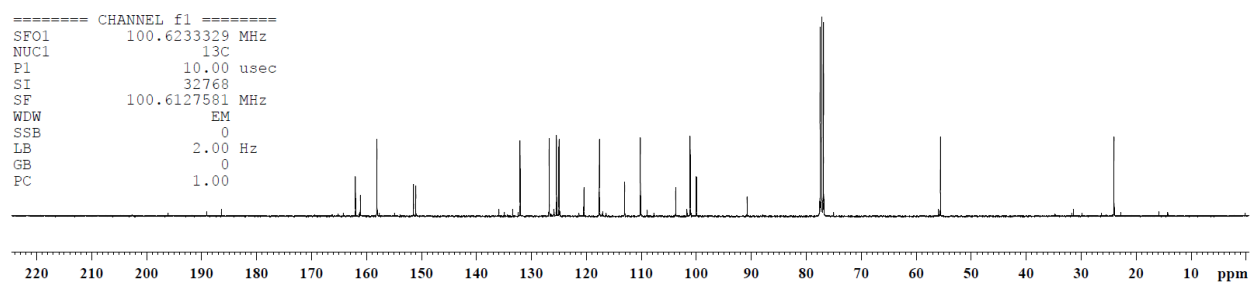

```

162.007
161.116
158.101
151.458
151.016

```

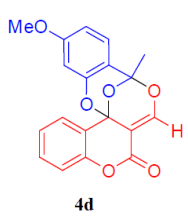

```

132.044
126.768
125.429
124.985
120.452
117.643
113.026
110.160
103.748
101.104
99.971
90.781

```

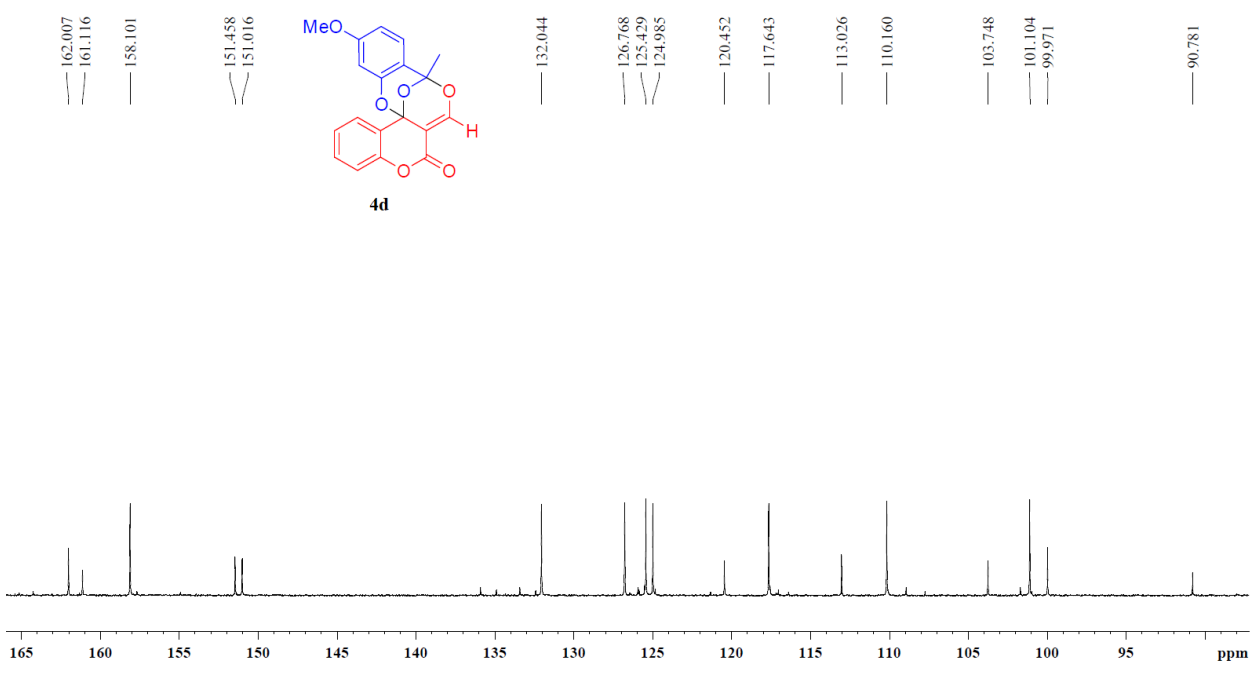

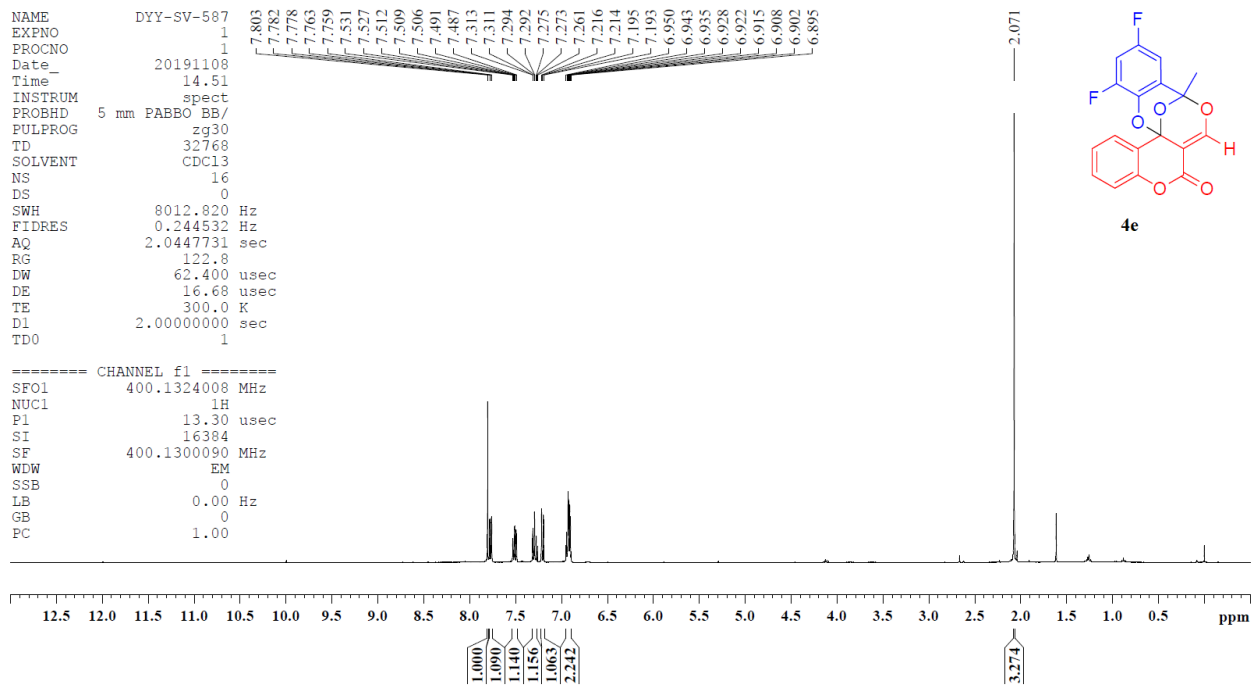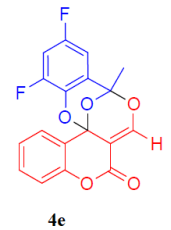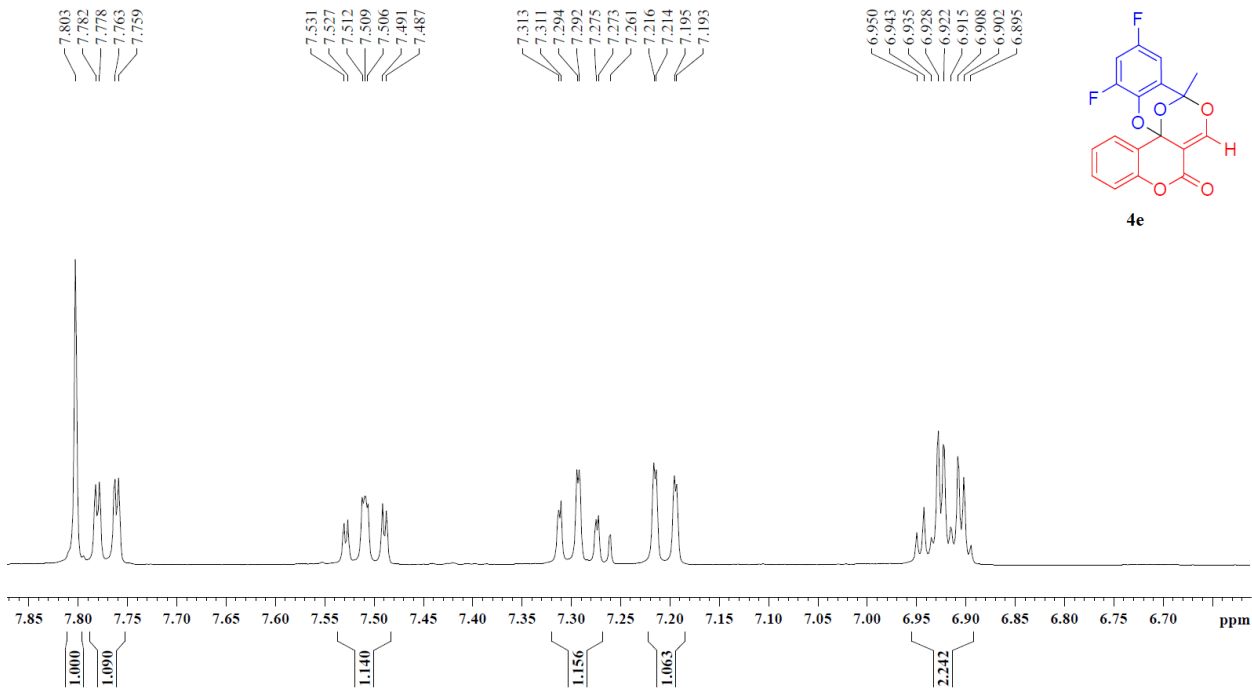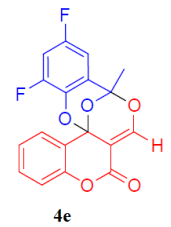



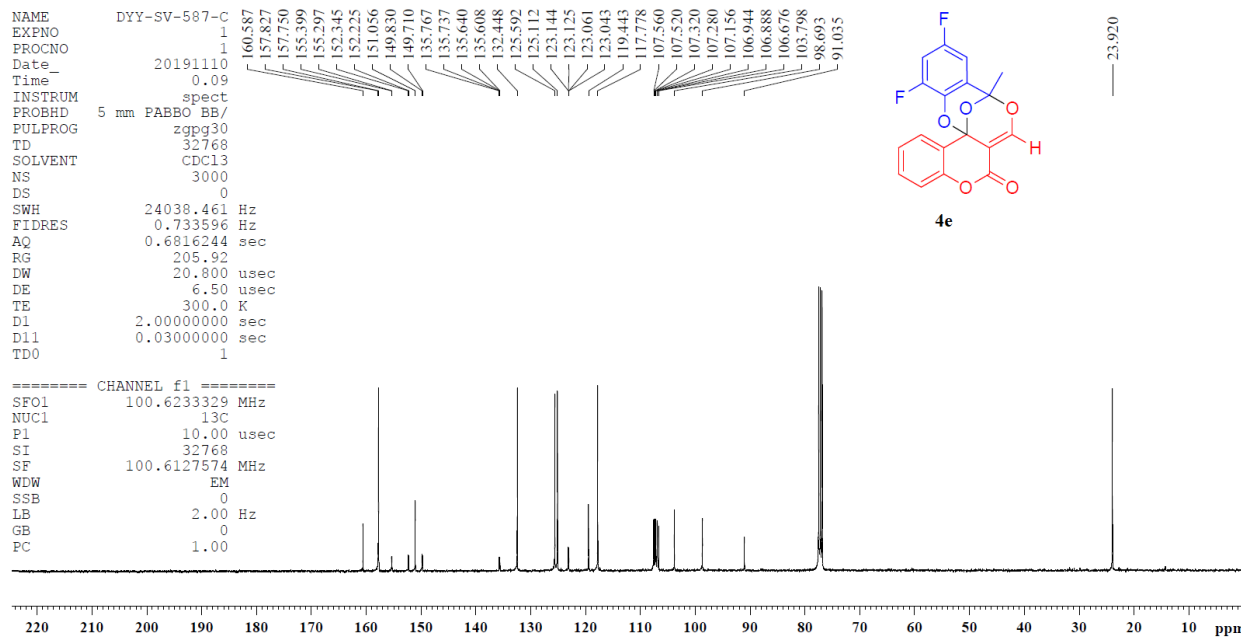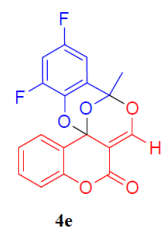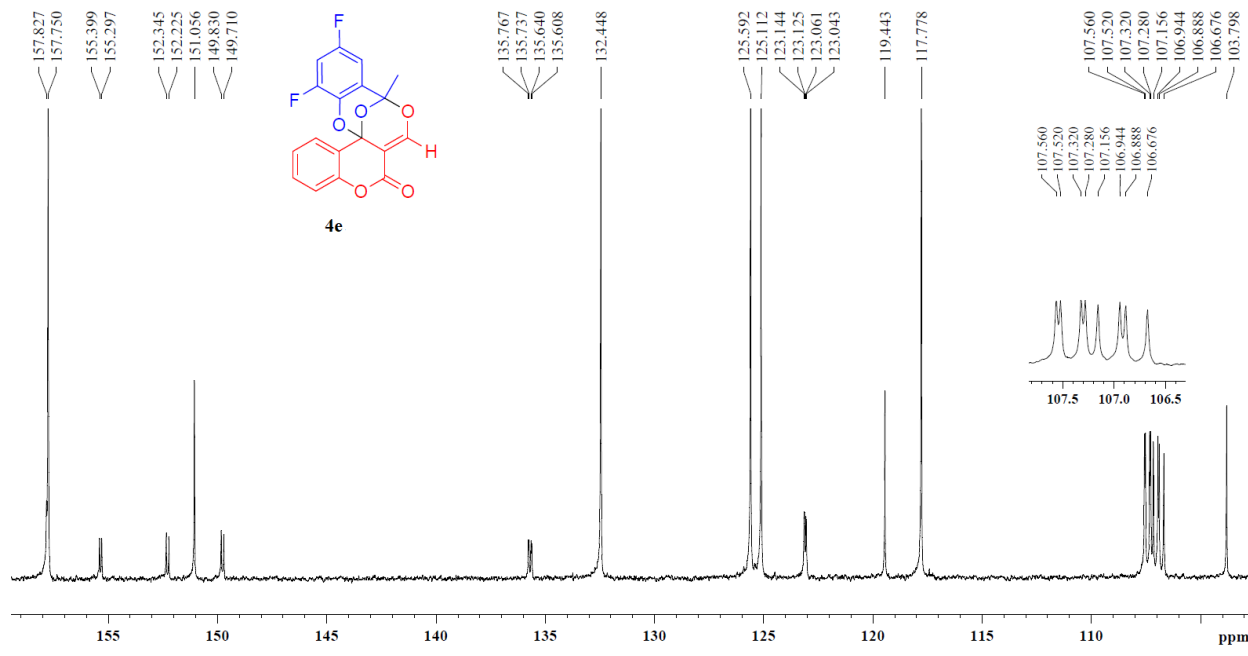

```

NAME          DIY-SV-515
EXPNO         1
PROCNO        1
Date_         20191105
Time_         10.15
INSTRUM       spect
PROBHD        5 mm PABBO BB/
PULPROG       zg30
TD            32768
SOLVENT       CDC13
NS            16
DS            0
SWH           8012.820 Hz
FIDRES        0.244532 Hz
AQ            2.0447731 sec
RG            163.06
DW            62.400 usec
DE            16.68 usec
TE            300.0 K
D1            2.00000000 sec
TD0           1

```

```

===== CHANNEL f1 =====
SFO1          400.1324008 MHz
NUC1          1H
P1            13.30 usec
SI            16384
SF            400.1300095 MHz
WDW           EM
SSB           0
LB            0.00 Hz
GB            0
PC            1.00

```

7.801  
7.485  
7.480  
7.464  
7.462  
7.390  
7.370  
7.359  
7.357  
7.339  
7.320  
7.318  
7.202  
7.193  
7.184  
7.179  
7.105  
7.086  
6.890  
6.870

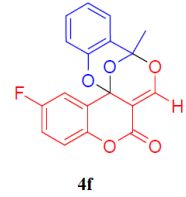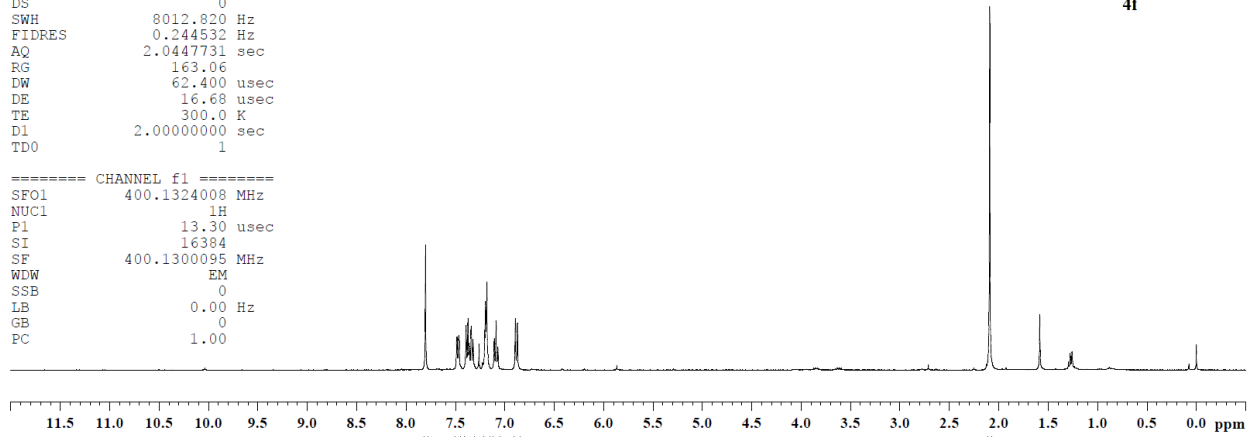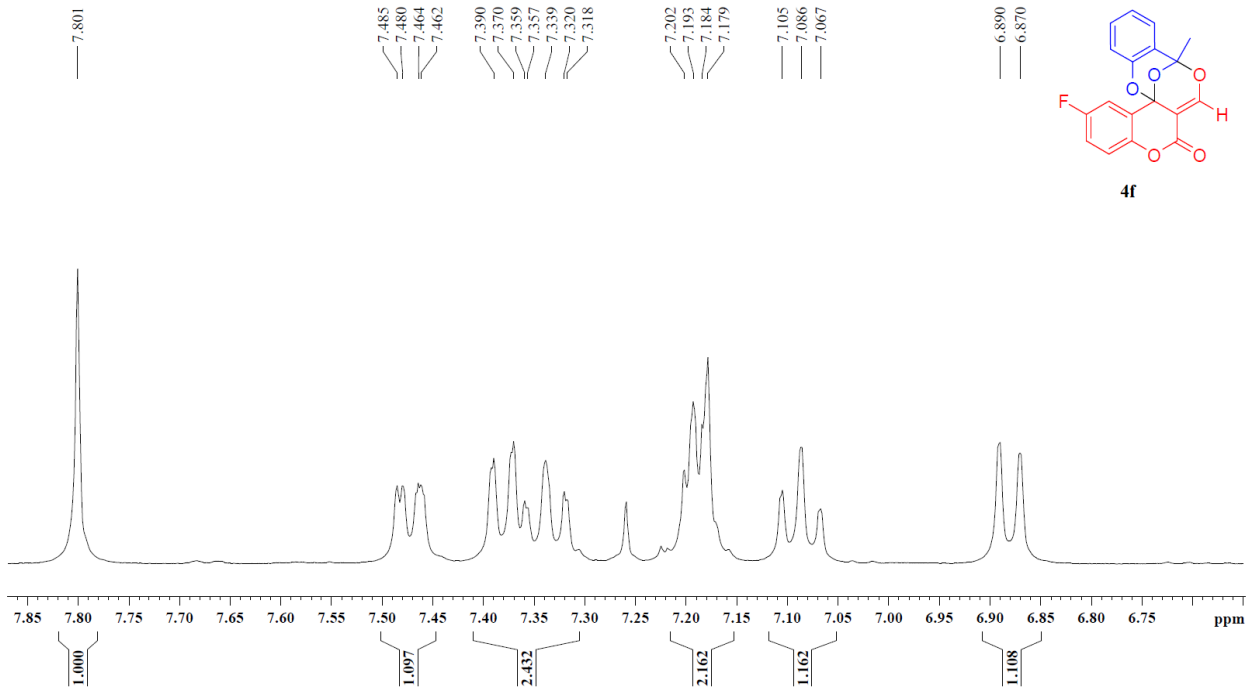

NAME DYU-SV-515-C  
 EXPNO 1  
 PROCNO 1  
 Date\_ 20191105  
 Time\_ 21.30  
 INSTRUM spect  
 PROBHD 5 mm PABBO BB/  
 PULPROG zgpg30  
 TD 32768  
 SOLVENT CDCl3  
 NS 3000  
 DS 0  
 SWH 24038.461 Hz  
 FIDRES 0.733596 Hz  
 AQ 0.6816244 sec  
 RG 205.92  
 DW 20.800 usec  
 DE 6.50 usec  
 TE 300.0 K  
 D1 2.00000000 sec  
 D11 0.03000000 sec  
 TD0 1

===== CHANNEL f1 =====  
 SFO1 100.6233329 MHz  
 NUC1 13C  
 P1 10.00 usec  
 SI 32768  
 SF 100.6127559 MHz  
 WDW EM  
 SSB 0  
 LB 2.00 Hz  
 GB 0  
 PC 1.00

160.753  
 160.535  
 158.431  
 158.100  
 149.900  
 147.118  
 147.094  
 131.667  
 125.893  
 122.680  
 121.826  
 121.746  
 120.549  
 119.336  
 119.254  
 118.985  
 117.340  
 112.307  
 112.056  
 103.260  
 99.805  
 90.281

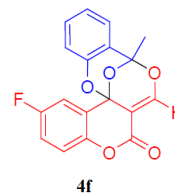

23.901

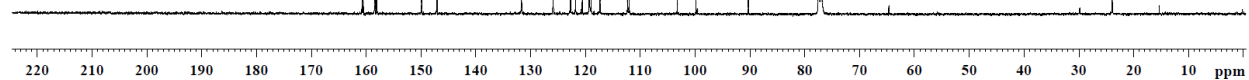

160.753  
 160.535  
 158.431  
 158.100  
 149.900  
 147.118  
 147.094  
 131.667  
 125.893  
 122.680  
 121.826  
 121.746  
 120.549  
 119.336  
 119.254  
 118.985  
 117.340  
 112.307  
 112.056  
 103.260  
 99.805  
 90.281

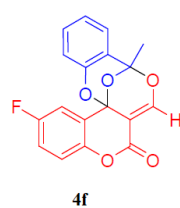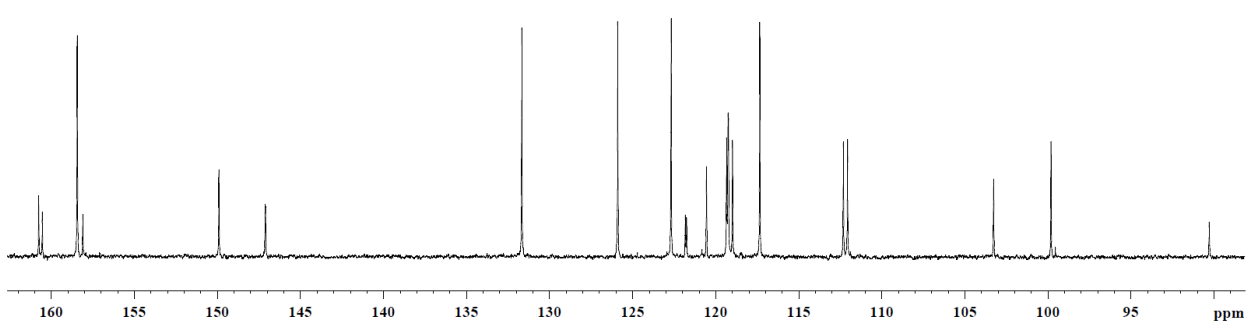

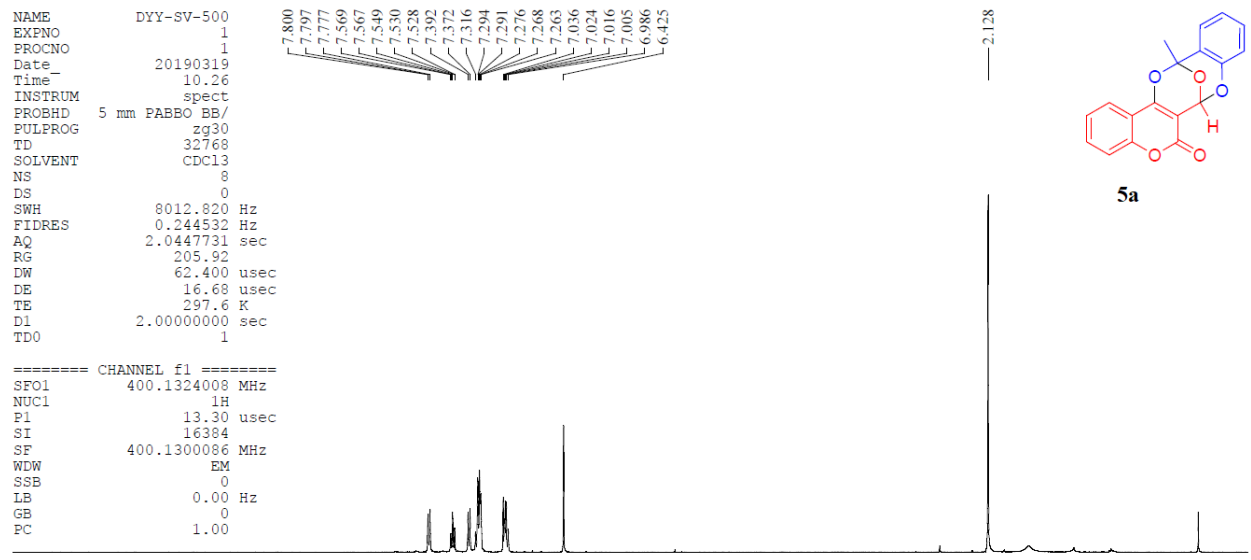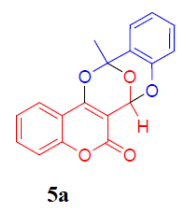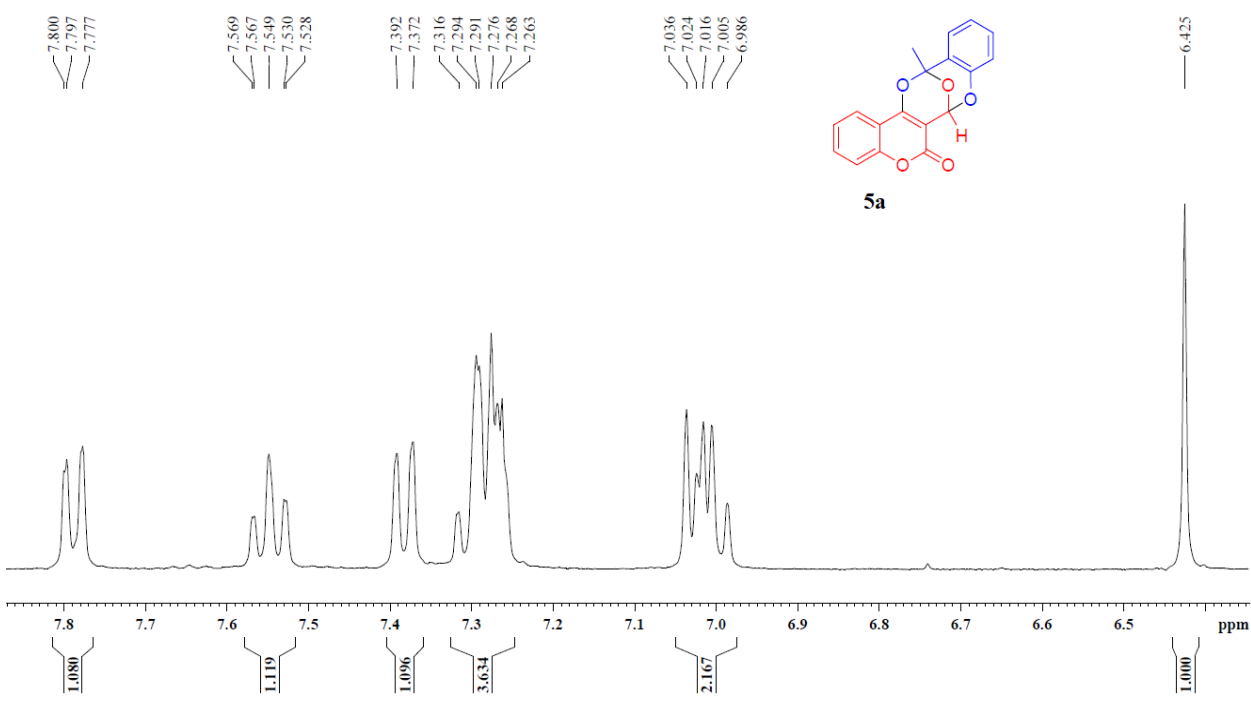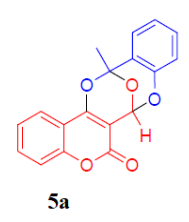

```

NAME      DYY-SV-500-C
EXPNO     1
PROCNO    1
Date_     20190319
Time      11.49
INSTRUM   spect
PROBHD    5 mm PABBO BB/
PULPROG   zgpg30
TD         32768
SOLVENT   CDCl3
NS         1600
DS         0
SWH        24038.461 Hz
FIDRES     0.733596 Hz
AQ         0.6816244 sec
RG         205.92
DW         20.800 usec
DE         6.50 usec
TE         298.9 K
D1         2.00000000 sec
D11        0.03000000 sec
TD0        1

```

```

===== CHANNEL f1 =====
SFO1      100.6233329 MHz
NUC1       13C
P1         10.00 usec
SI         32768
SF         100.6127558 MHz
WDW        EM
SSB        0
LB         2.00 Hz
GB         0
PC         1.00

```

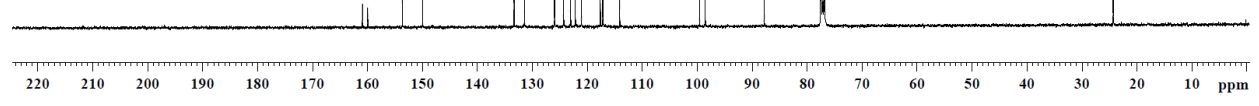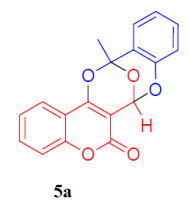

160.932  
159.983  
153.684  
149.979  
133.358  
131.457  
125.963  
124.329  
123.049  
122.179  
121.101  
117.634  
117.176  
114.116  
99.552  
98.547  
87.808  
24.293

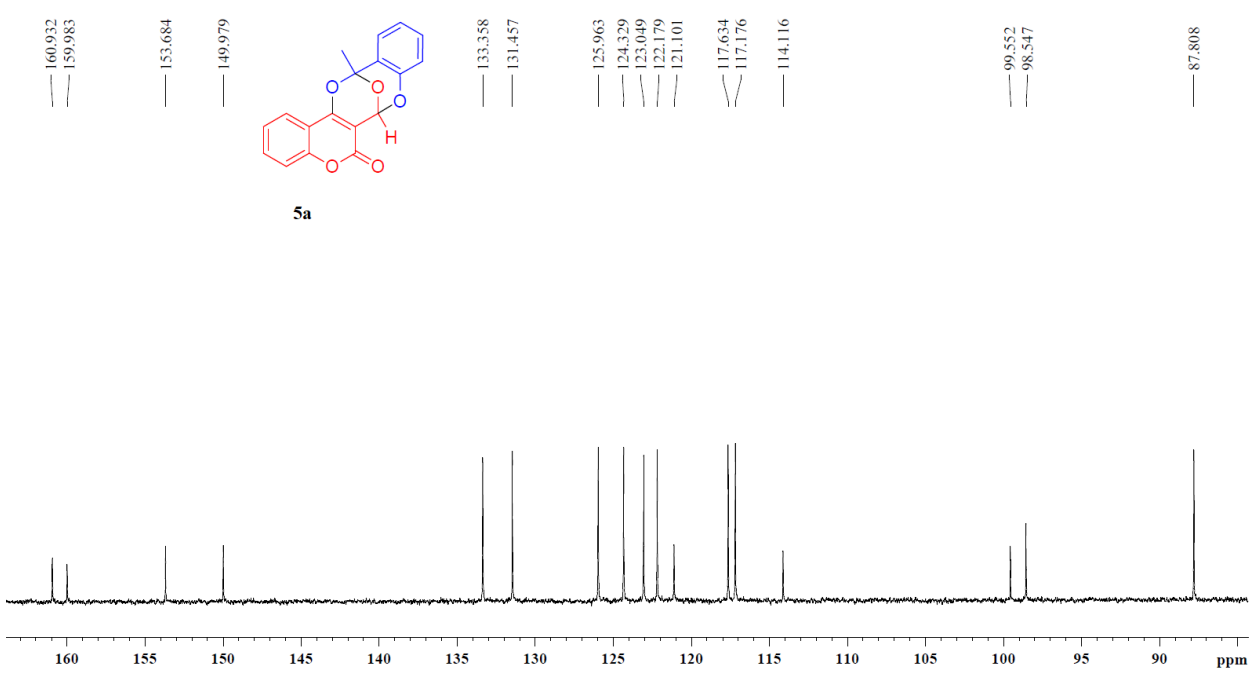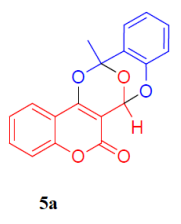

160.932  
159.983  
153.684  
149.979  
133.358  
131.457  
125.963  
124.329  
123.049  
122.179  
121.101  
117.634  
117.176  
114.116  
99.552  
98.547  
87.808

```

NAME      DYY-SV-517-H2
EXPNO    1
PROCNO   1
Date_    20191130
Time     13.40
INSTRUM  spect
PROBHD   5 mm PABBO BB/
PULPROG  zg30
TD       32768
SOLVENT  CDC13
NS       16
DS       0
SWH      8012.820 Hz
FIDRES   0.244532 Hz
AQ       2.0447731 sec
RG       205.92
DW       62.400 usec
DE       16.68 usec
TE       300.0 K
D1       2.00000000 sec
TD0      1

```

7.808  
7.805  
7.788  
7.785  
7.598  
7.580  
7.561  
7.358  
7.352  
7.323  
7.313  
7.305  
7.292  
7.269  
7.261  
7.247  
7.241  
6.989  
6.967  
6.420

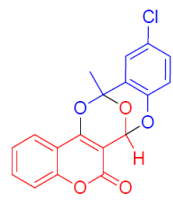

2.113

```

===== CHANNEL f1 =====
SF01    400.1324008 MHz
NUC1     1H
P1       13.30 usec
SI       16384
SF       400.1300095 MHz
WDW      EM
SSB      0
LB       0.00 Hz
GB       0
PC       1.00

```

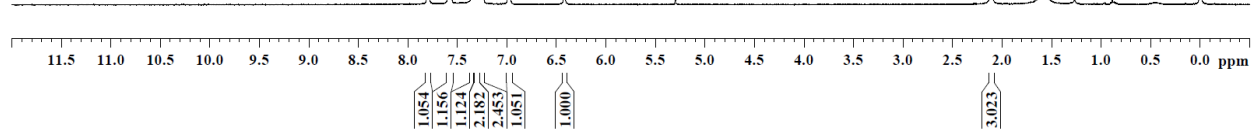

7.808  
7.805  
7.788  
7.785

7.598  
7.580  
7.561

7.358  
7.352  
7.323  
7.313  
7.305  
7.292  
7.269  
7.261  
7.247  
7.241

6.989  
6.967

6.420

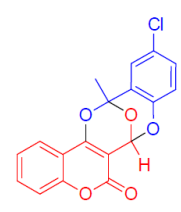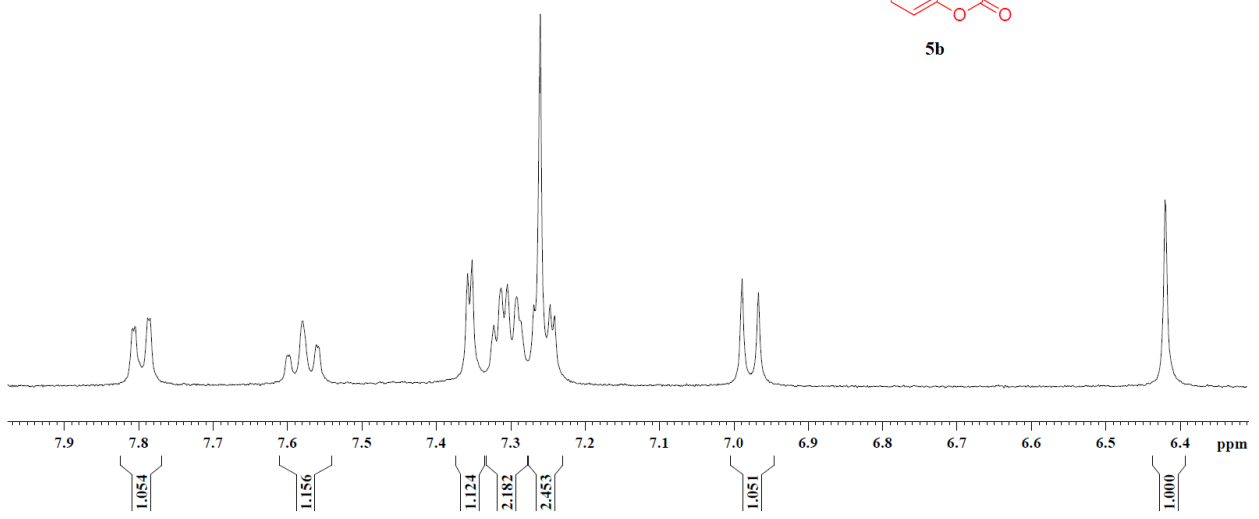

```

NAME      DYY-SV-517-C
EXPNO     1
PROCNO    1
Date_     20191125
Time      2.07
INSTRUM   spect
PROBHD    5 mm PABBO BB/
PULPROG   zgpg30
TD         32768
SOLVENT   CDC13
NS         2400
DS         0
SWH        24038.461 Hz
FIDRES     0.733596 Hz
AQ         0.6816244 sec
RG         205.92
DW         20.800 usec
DE         6.50 usec
TE         300.0 K
D1         2.00000000 sec
D11        0.03000000 sec
TDO        1

```

```

===== CHANNEL f1 =====
SFO1      100.6233329 MHz
NUC1       13C
P1         10.00 usec
SI         32768
SF         100.6127571 MHz
WDW        EM
SSB        0
LB         2.00 Hz
GB         0
PC         1.00

```

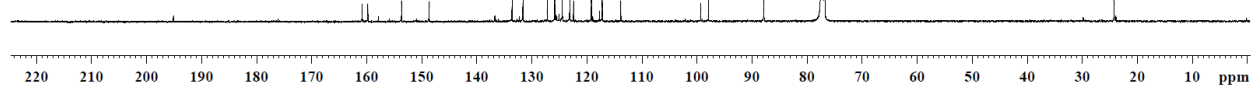

160.833  
 159.803  
 153.683  
 148.635  
 133.592  
 131.605  
 127.171  
 125.805  
 124.460  
 123.093  
 122.413  
 119.204  
 117.216  
 113.831  
 99.310  
 97.908  
 87.847

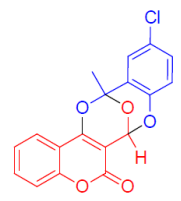

5b

24.206

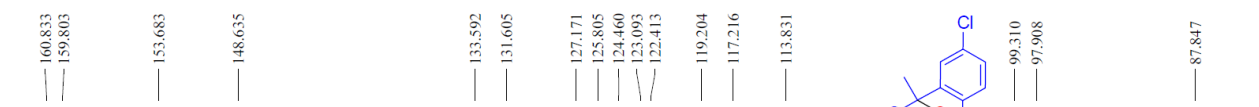

160.833  
 159.803  
 153.683  
 148.635

133.592  
 131.605  
 127.171  
 125.805  
 124.460  
 123.093  
 122.413  
 119.204  
 117.216  
 113.831

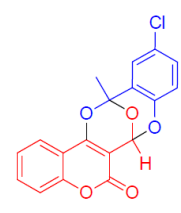

5b

99.310  
 97.908

87.847

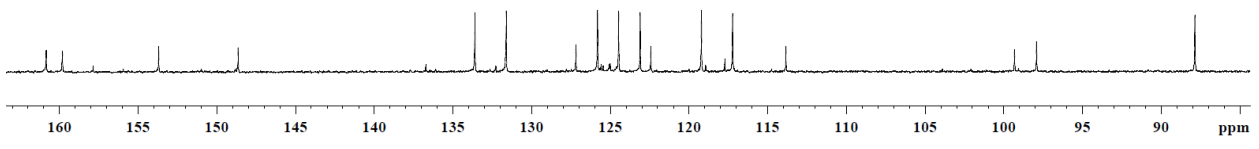

160 155 150 145 140 135 130 125 120 115 110 105 100 95 90 ppm

NAME DYV-SV-516-H  
 EXPNO 1  
 PROCNO 1  
 Date\_ 20191124  
 Time 15.25  
 INSTRUM spect  
 PROBHD 5 mm PABBO BB/  
 PULPROG zg30  
 TD 32768  
 SOLVENT CDCl3  
 NS 8  
 DS 0  
 SWH 8012.820 Hz  
 FIDRES 0.244532 Hz  
 AQ 2.0447731 sec  
 RG 101.51  
 DW 62.400 usec  
 DE 16.68 usec  
 TE 300.0 K  
 DL 2.00000000 sec  
 TD0 1

===== CHANNEL f1 =====  
 SFO1 400.1324008 MHz  
 NUC1 1H  
 P1 13.30 usec  
 SI 16384  
 SF 400.1300121 MHz  
 WDW EM  
 SSB 0  
 LB 0.00 Hz  
 GB 0  
 PC 1.00

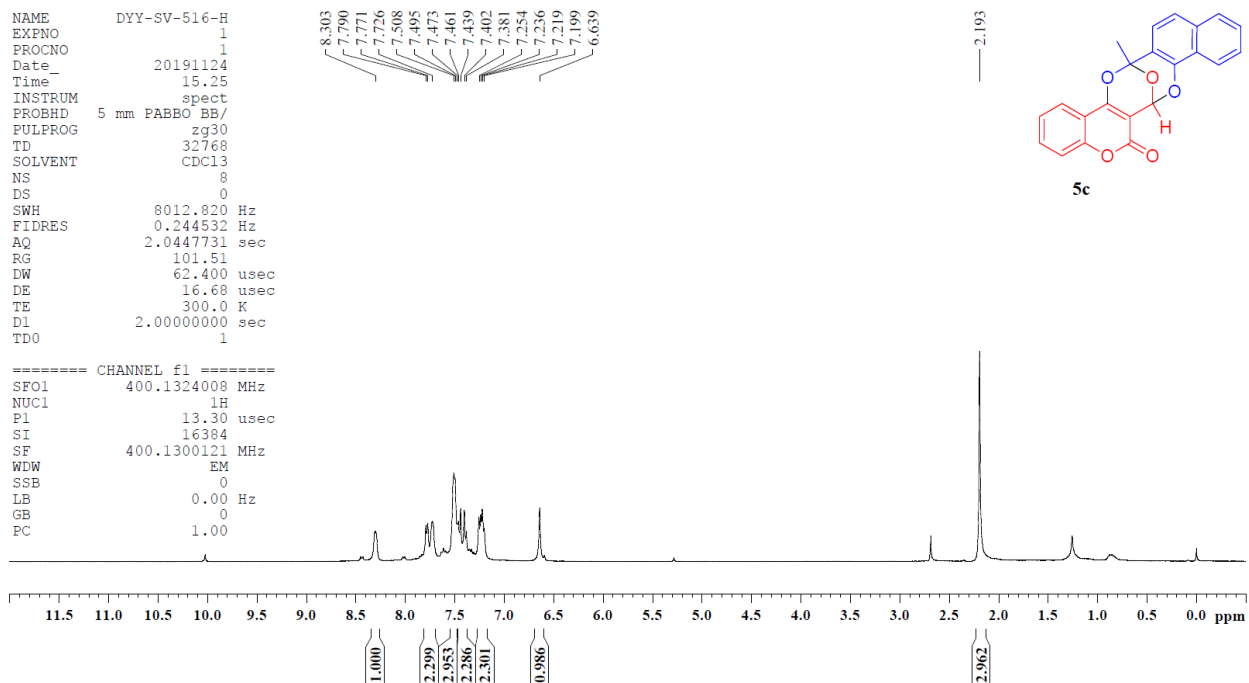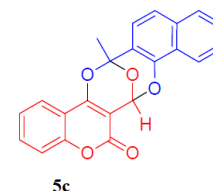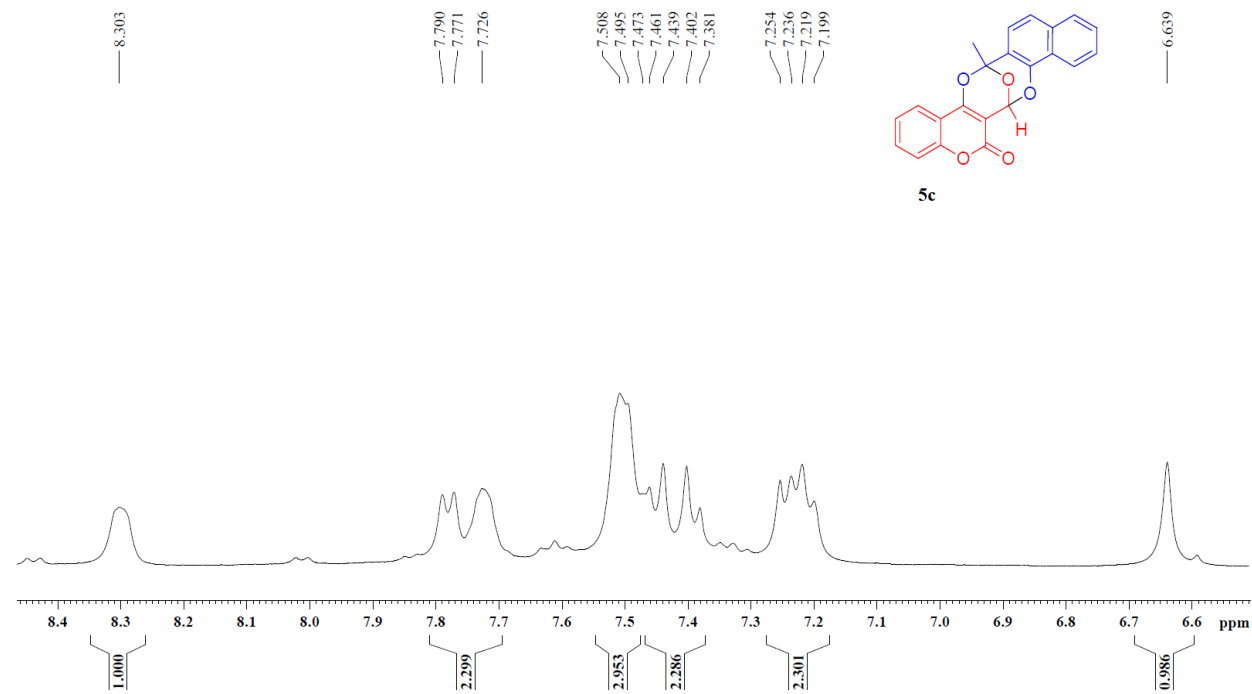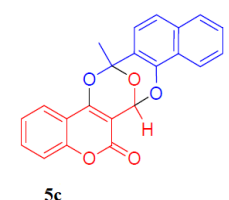



NAME DYI-SV-516-C  
 EXPNO 1  
 PROCNO 1  
 Date\_ 20191125  
 Time\_ 0.13  
 INSTRUM spect  
 PROBDH 5 mm PABBO BB/  
 PULPROG zgpg30  
 TD 32768  
 SOLVENT CDCl3  
 NS 2400  
 DS 0  
 SWH 24038.461 Hz  
 FIDRES 0.733596 Hz  
 AQ 0.6816244 sec  
 RG 205.92  
 DW 20.800 usec  
 DE 6.50 usec  
 TE 300.0 K  
 D1 2.00000000 sec  
 D11 0.03000000 sec  
 TD0 1

===== CHANNEL f1 =====  
 SFO1 100.6233329 MHz  
 NUC1 13C  
 P1 10.00 usec  
 SI 32768  
 SF 100.6127610 MHz  
 WDW EM  
 SSB 0  
 LB 2.00 Hz  
 GB 0  
 PC 1.00

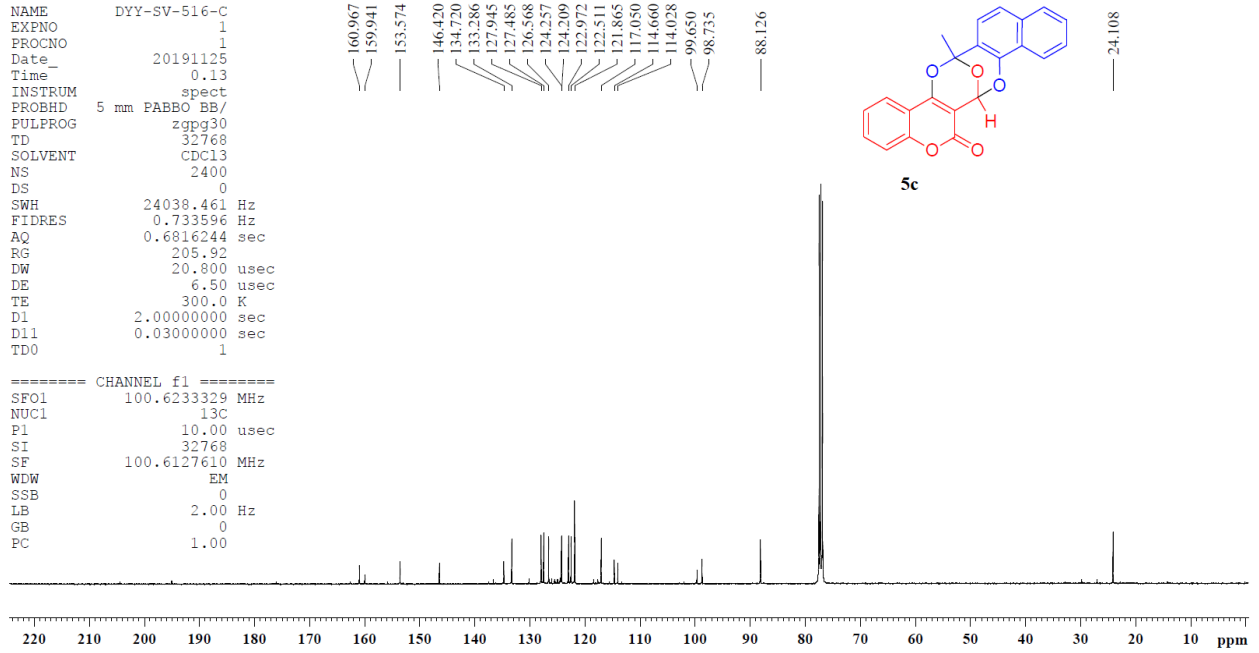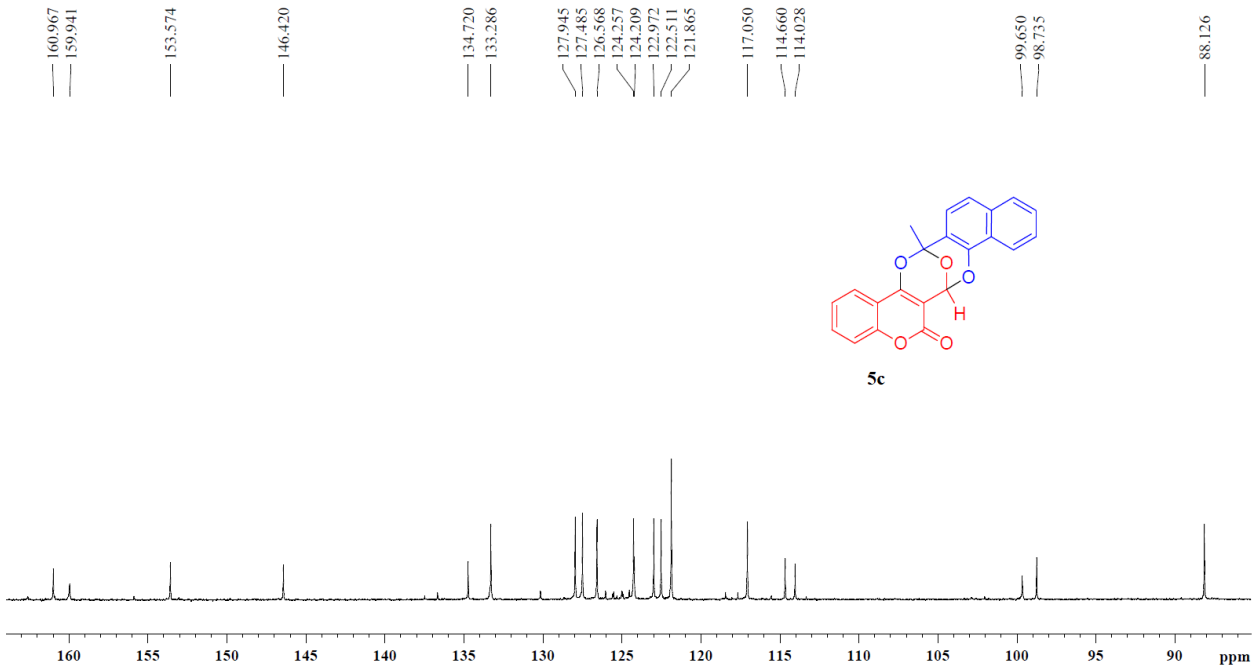

```

NAME      DYY-SV-601-H
EXPNO    1
PROCNO    1
Date_    20191130
Time     13.56
INSTRUM  spect
PROBHD    5 mm PABBO BB/
PULPROG   zg30
TD        32768
SOLVENT   CDCl3
NS        16
DS        0
SWH       8012.820 Hz
FIDRES    0.244532 Hz
AQ        2.0447731 sec
RG        101.51
DW        62.400 usec
DE        16.68 usec
TE        300.0 K
D1        2.00000000 sec
TD0       1

```

```

===== CHANNEL f1 =====
SFO1     400.1324008 MHz
NUC1     13.1H
F1       13.30 usec
SI       16384
SF       400.1300066 MHz
WDW      EM
SSB      0
LB       0.00 Hz
GB       0
PC       1.00

```

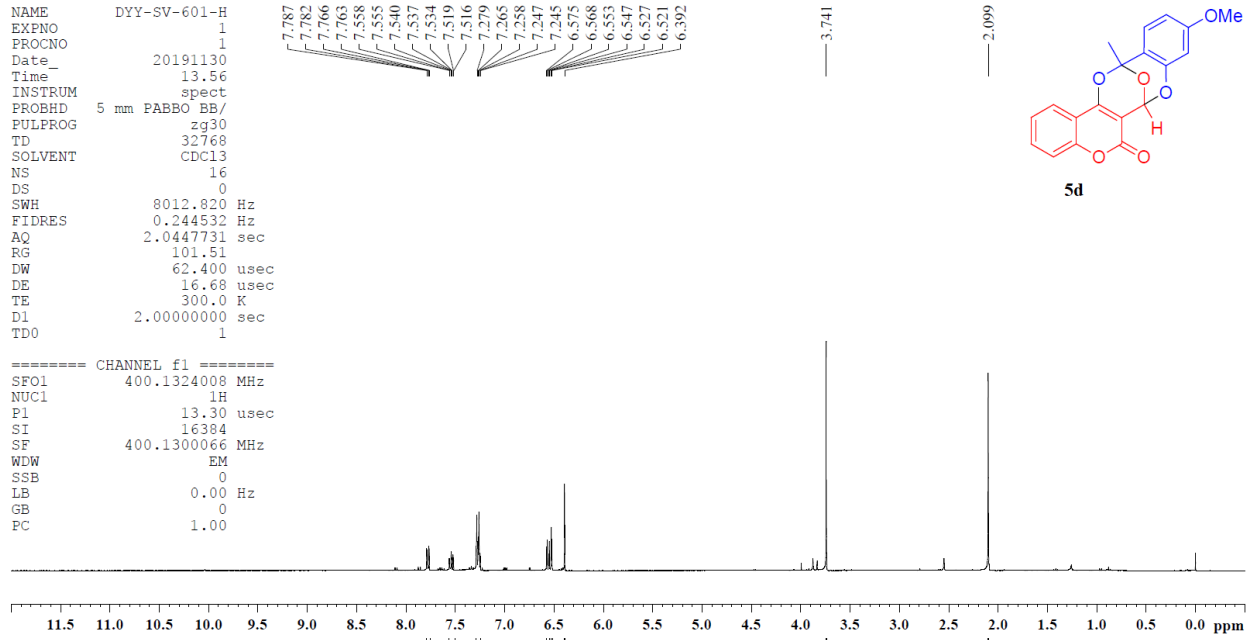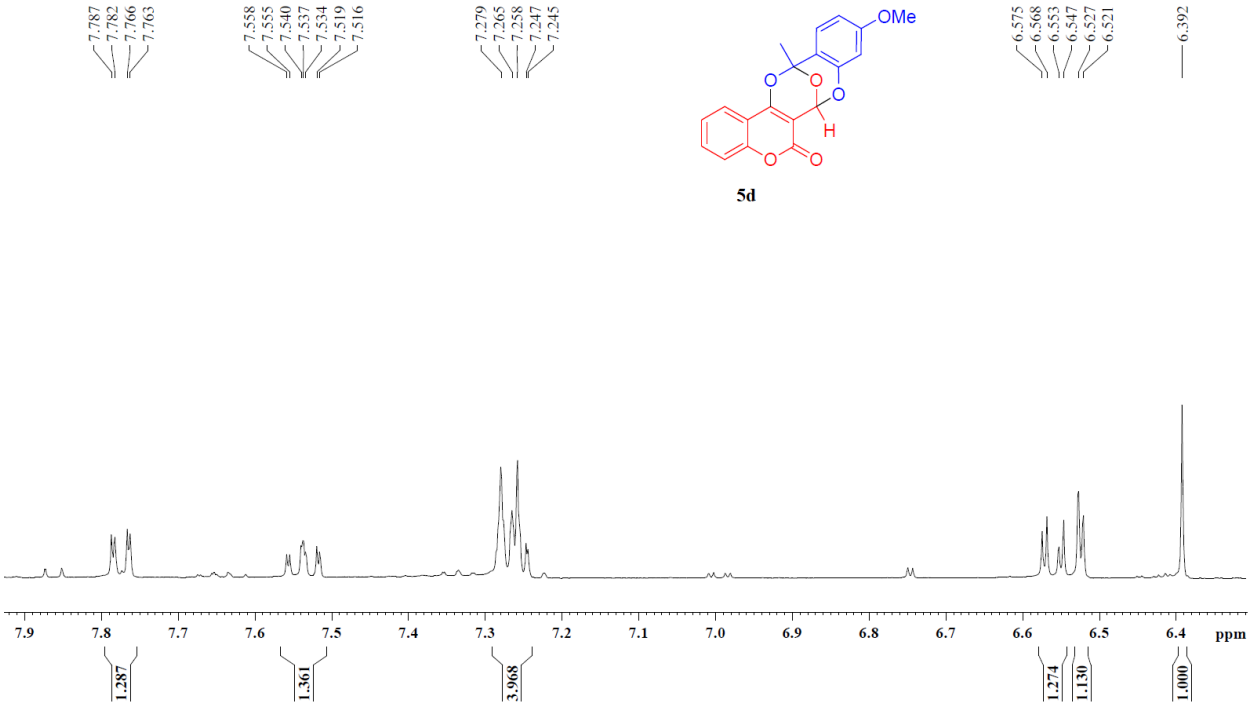

```

NAME      DYY-SV-601-C
EXPNO     1
PROCNO    1
Date_     20191130
Time      21.56
INSTRUM   spect
PROBHD    5 mm PABBO BB/
PULPROG   zgpg30
TD         32768
SOLVENT   CDCl3
NS         2000
DS         0
SWH        24038.461 Hz
FIDRES     0.733596 Hz
AQ         0.6816244 sec
RG         205.92
DW         20.800 usec
DE         6.50 usec
TE         300.0 K
D1         2.00000000 sec
D11        0.03000000 sec
TDO        1

```

161.927  
160.887  
160.069  
153.637  
151.278

133.281  
126.850  
124.292  
123.045  
117.102  
114.158  
113.348  
110.002  
101.230  
99.479  
98.831  
87.941

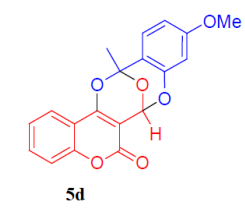

**5d**

```

===== CHANNEL f1 =====
SFO1      100.6233329 MHz
NUC1       13C
P1         10.00 usec
SI         32768
SF         100.6127587 MHz
WDW        EM
SSB         0
LB         2.00 Hz
GB         0
PC         1.00

```

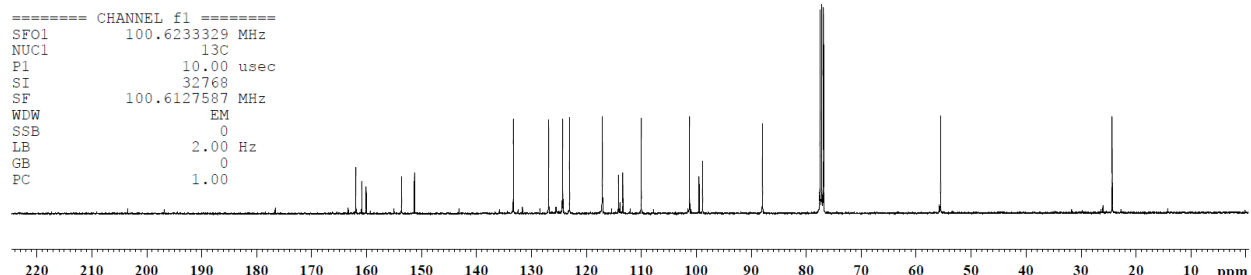

161.927  
160.887  
160.069  
153.637  
151.278

133.281  
126.850  
124.292  
123.045  
117.102  
114.158  
113.348  
110.002

101.230  
99.479  
98.831  
87.941

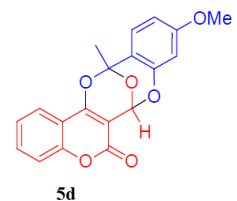

**5d**

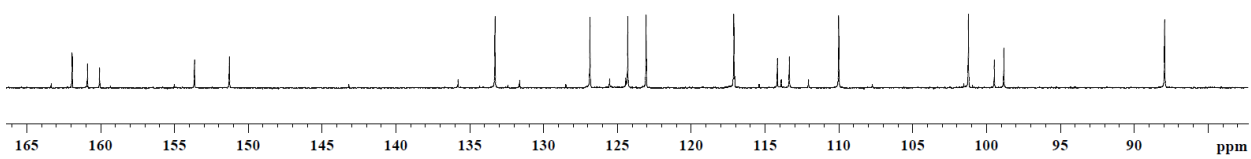

```

NAME      DYY-SV-546
EXPNO    1
PROCNO   1
Date_    20191130
Time     13.46
INSTRUM  spect
PROBHD   5 mm PABBO BB/
FULPROG  zg30
TD       32768
SOLVENT  CDCl3
NS       16
DS       0
SWH      8012.820 Hz
FIDRES   0.244532 Hz
AQ       2.0447731 sec
RG       163.06
DW       62.400 usec
DE       16.68 usec
TE       300.0 K
D1       2.00000000 sec
D11      1
TD0      1

```

```

===== CHANNEL f1 =====
SFO1     400.1324008 MHz
NUC1     1H
FI       13.30 usec
SI       16384
SF       400.1300061 MHz
WDW      EM
SSB      0
LB       0.00 Hz
GB       0
FC       1.00

```

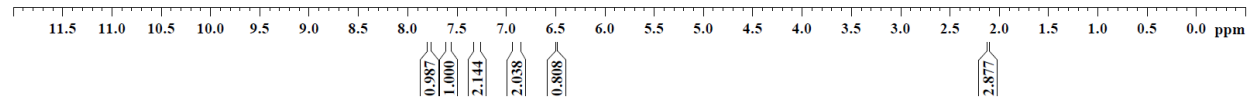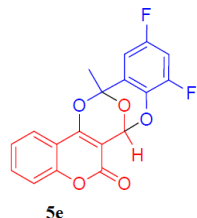

7.794, 7.790, 7.773, 7.770, 7.609, 7.605, 7.588, 7.569, 7.566, 7.323, 7.315, 7.313, 7.305, 7.294, 7.292, 7.287, 7.267, 6.934, 6.927, 6.922, 6.913, 6.909, 6.902, 6.889, 6.885, 6.882, 6.878, 6.864, 6.857

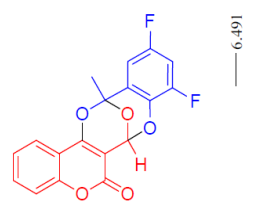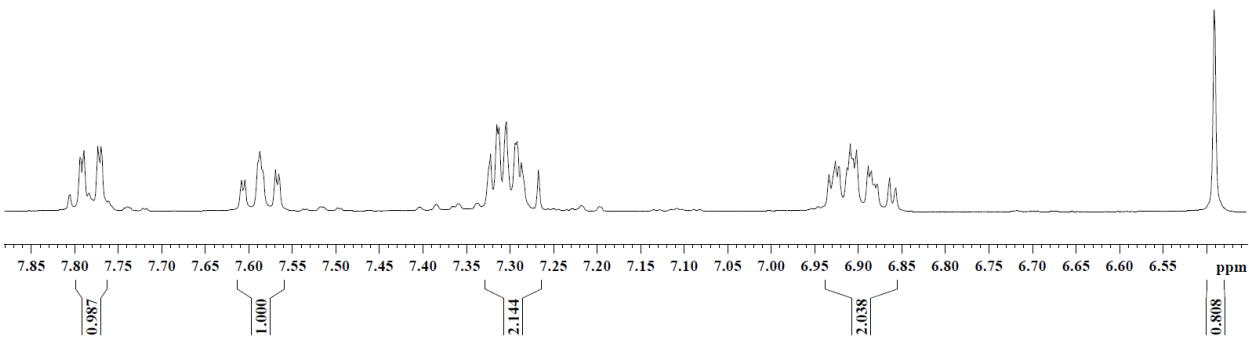

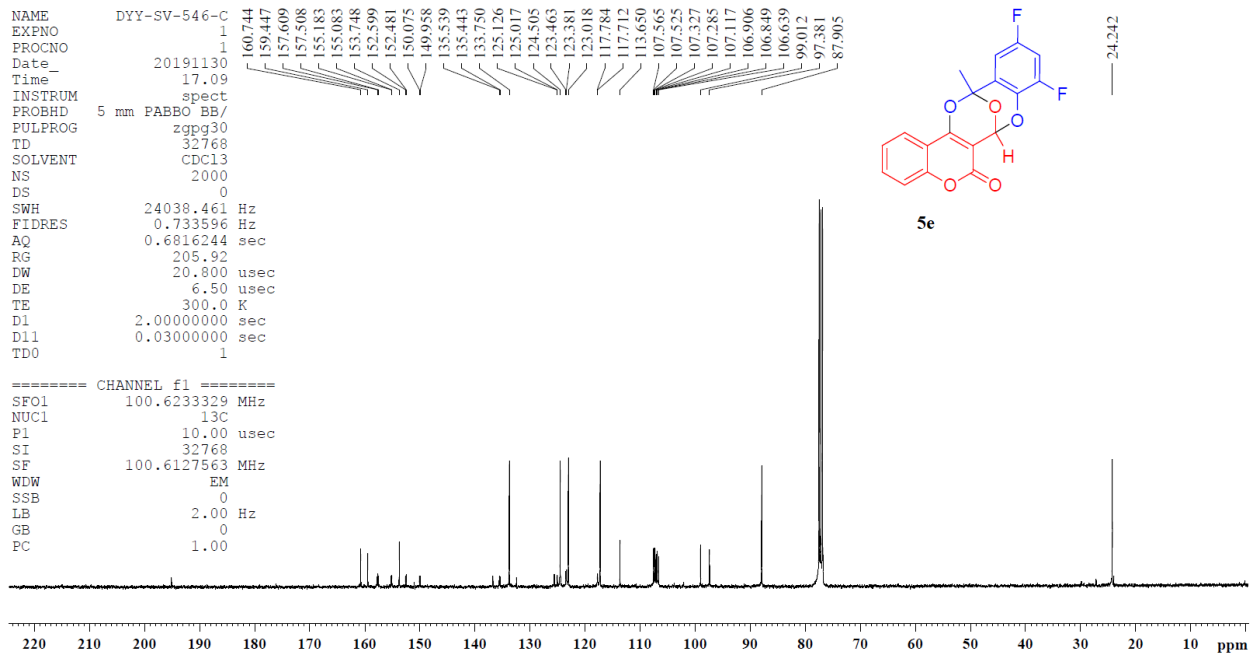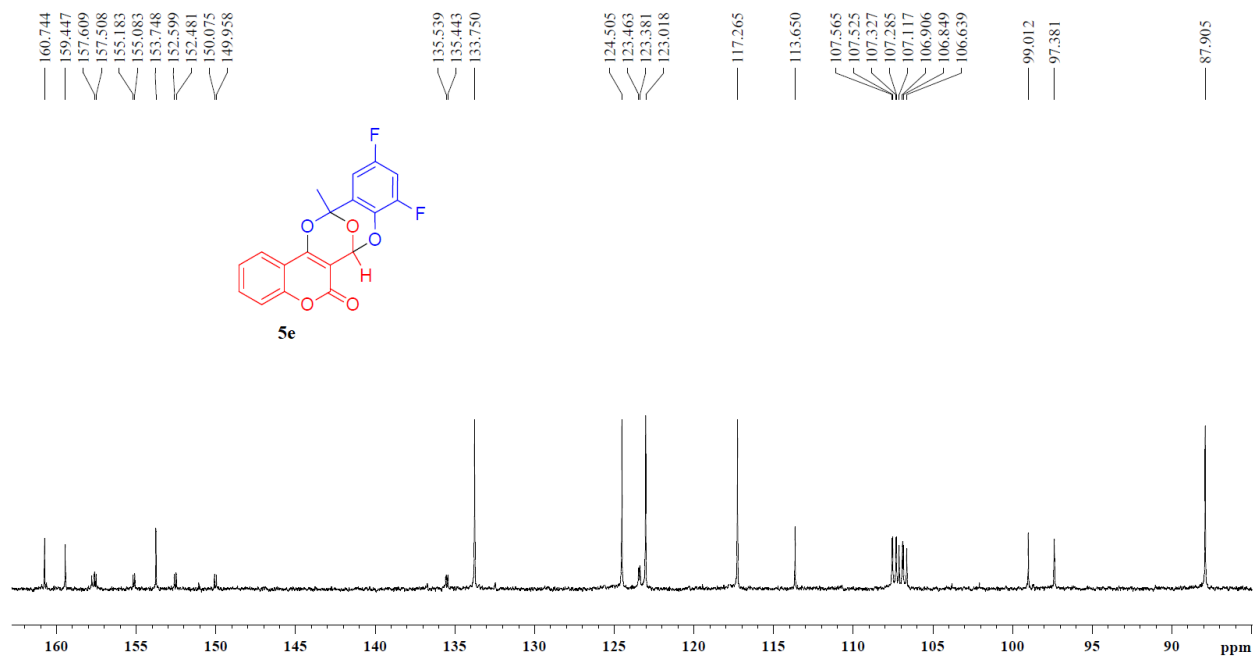

```

NAME      DYY-SV-510
EXPNO    1
PROCNO    1
Date_    20190326
Time     10.19
INSTRUM   spect
PROBHD    5 mm PABBO BB/
PULPROG   zg30
TD        32768
SOLVENT   CDCl3
NS        16
DS        0
SWH       8012.820 Hz
FIDRES    0.244532 Hz
AQ        2.0447731 sec
RG        205.92
DW        62.400 usec
DE        16.68 usec
TE        297.7 K
D1        2.00000000 sec
TDO       1

```

```

===== CHANNEL f1 =====
SFO1     400.1324008 MHz
NUC1     1H
P1       13.30 usec
SI       16384
SF       400.1300079 MHz
WDW      EM
SSB      0
LB       0.00 Hz
GB       0
PC       1.00

```

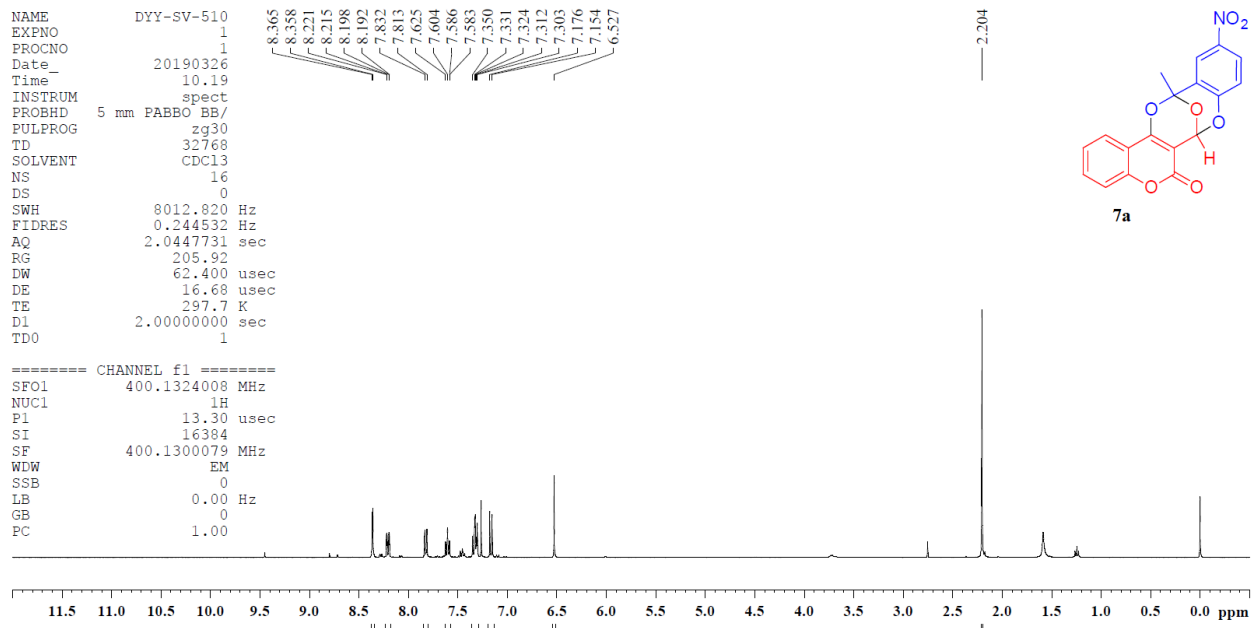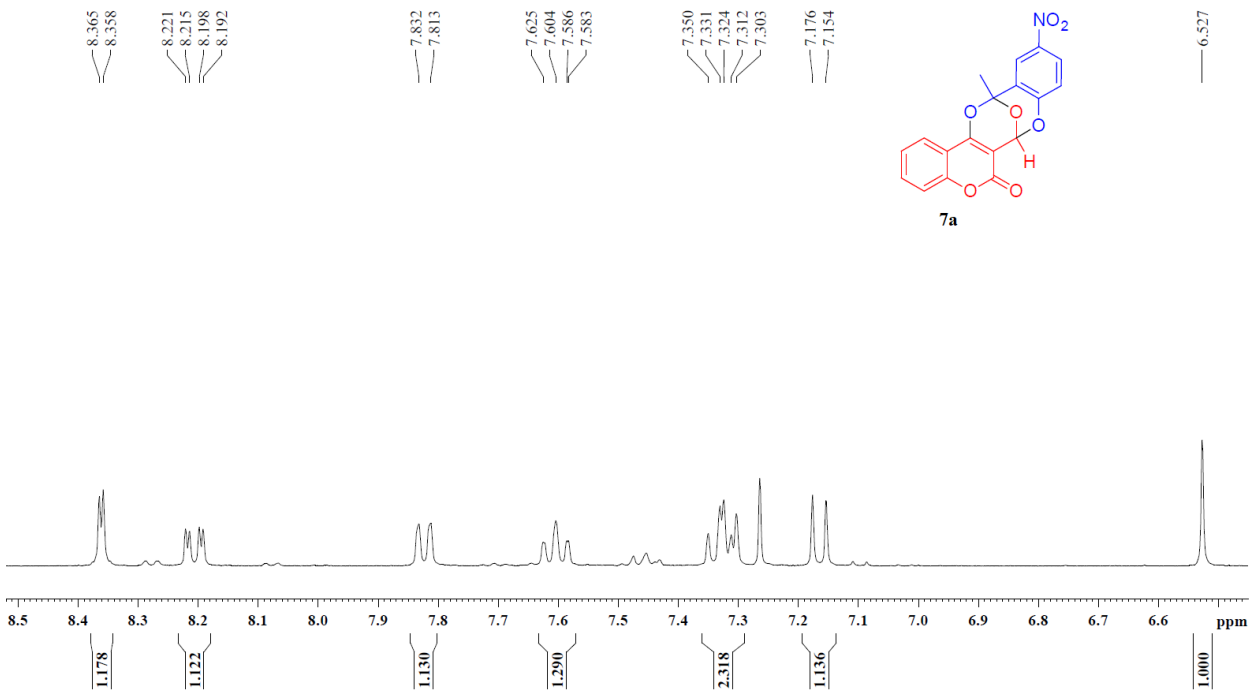

```

NAME      DYY-SV-510-C
EXPNO    1
PROCNO   1
Date_    20190326
Time     14.06
INSTRUM  spect
PROBHD   5 mm PABBO BB/
PULPROG  zgpg30
TD       32768
SOLVENT  CDCl3
NS       2000
DS       0
SWH      24038.461 Hz
FIDRES   0.733596 Hz
AQ       0.6816244 sec
RG       205.92
DW       20.800 usec
DE       6.50 usec
TE       298.7 K
D1       2.00000000 sec
D11      0.03000000 sec
TDO      1

```

```

===== CHANNEL f1 =====
SFO1    100.6233329 MHz
NUC1    13C
P1      10.00 usec
SI      32768
SF      100.6127544 MHz
WDW     EM
SSB     0
LB      2.00 Hz
GB      0
PC      1.00

```

220 210 200 190 180 170 160 150 140 130 120 110 100 90 80 70 60 50 40 30 20 10 ppm

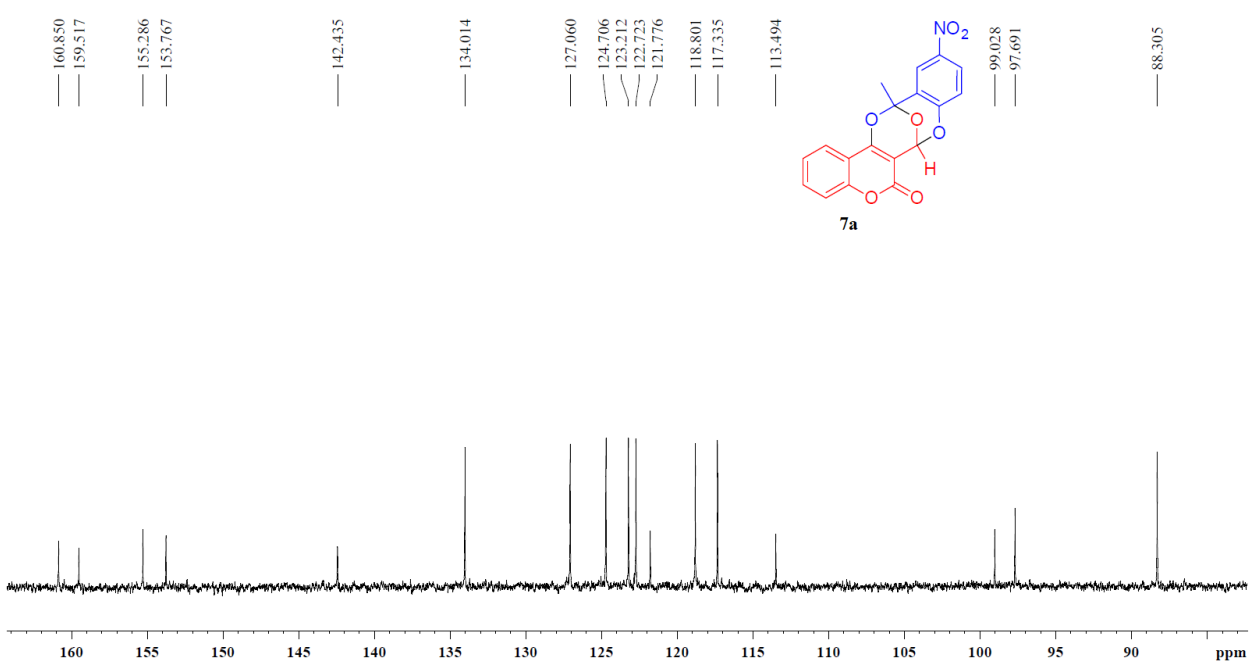

```

NAME      DYY-SV-542-H
EXPNO    1
PROCNO   1
Date_    20190907
Time     17.18
INSTRUM  spect
PROBHD   5 mm PABBO BB/
PULPROG  zg30
TD       32768
SOLVENT  CDC13
NS       8
DS       0
SWH      8012.820 Hz
FIDRES   0.244532 Hz
AQ       2.0447731 sec
RG       181.8
DW       62.400 usec
DE       16.68 usec
TE       300.0 K
D1       2.00000000 sec
TD0      1

```

```

===== CHANNEL f1 =====
SFO1     400.1324008 MHz
NUC1     1H
P1       13.30 usec
SI       16384
SF       400.1300075 MHz
WDW      EM
SSB      0
LB       0.00 Hz
GB       0
PC       1.00

```

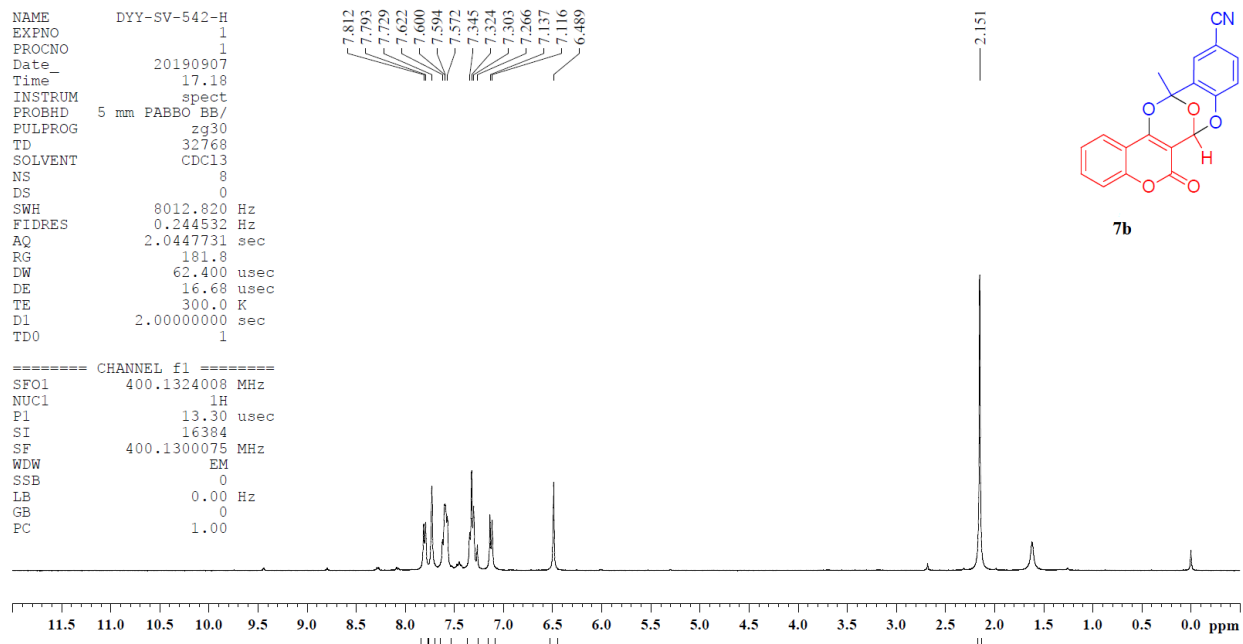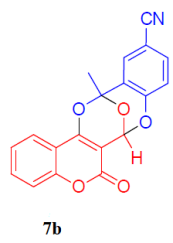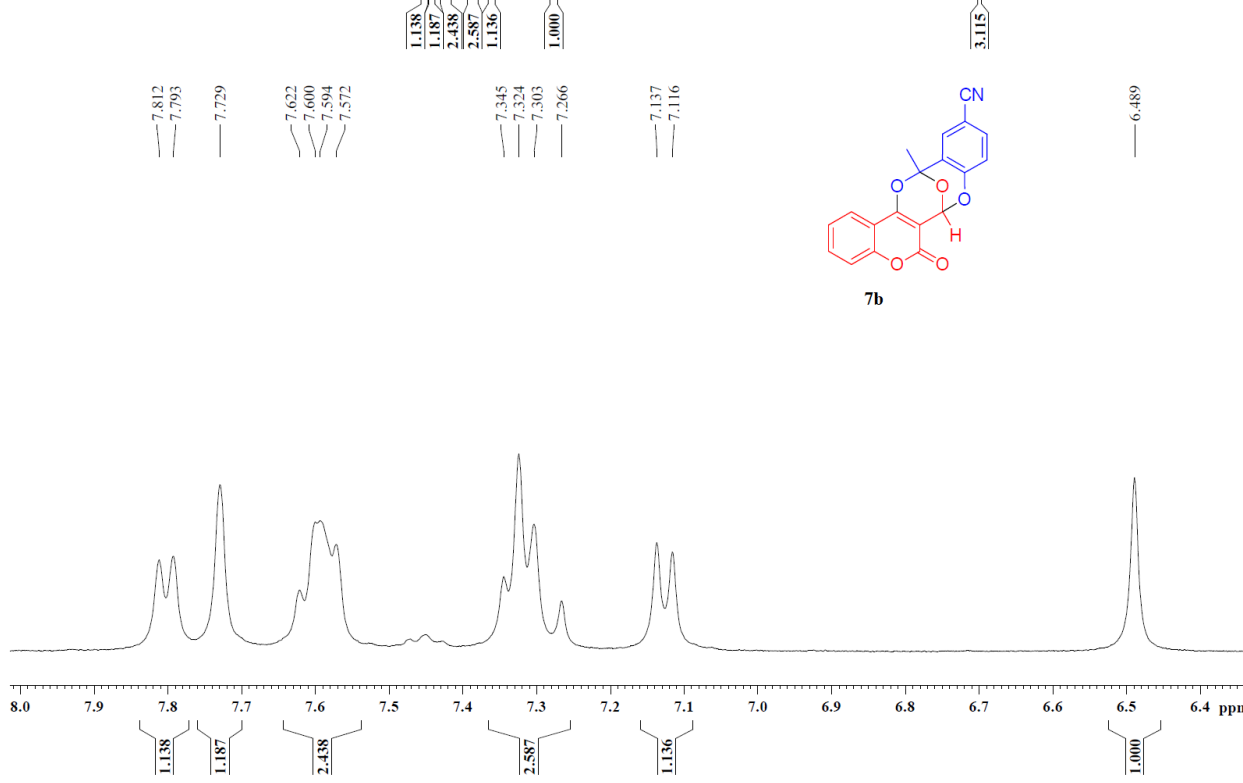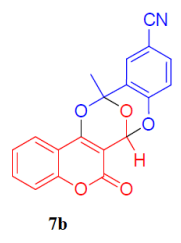



```

NAME      DYY-SV-542-C
EXPNO    1
PROCNO   1
Date_    20190907
Time     20.38
INSTRUM  spect
PROBHD   5 mm PABBO BB/
PULPROG  zgpg30
TD       32768
SOLVENT  CDC13
NS       2000
DS       0
SWH      24038.461 Hz
FIDRES   0.733596 Hz
AQ       0.6816244 sec
RG       205.92
DW       20.800 usec
DE       6.50 usec
TE       300.0 K
D1       2.00000000 sec
D11      0.03000000 sec
TD0      1

```

```

===== CHANNEL f1 =====
SF01    100.6233329 MHz
NUC1     13C
P1       10.00 usec
SI       32768
SF       100.6127547 MHz
WDW      EM
SSB      0
LB       2.00 Hz
GB       0
PC       1.00

```

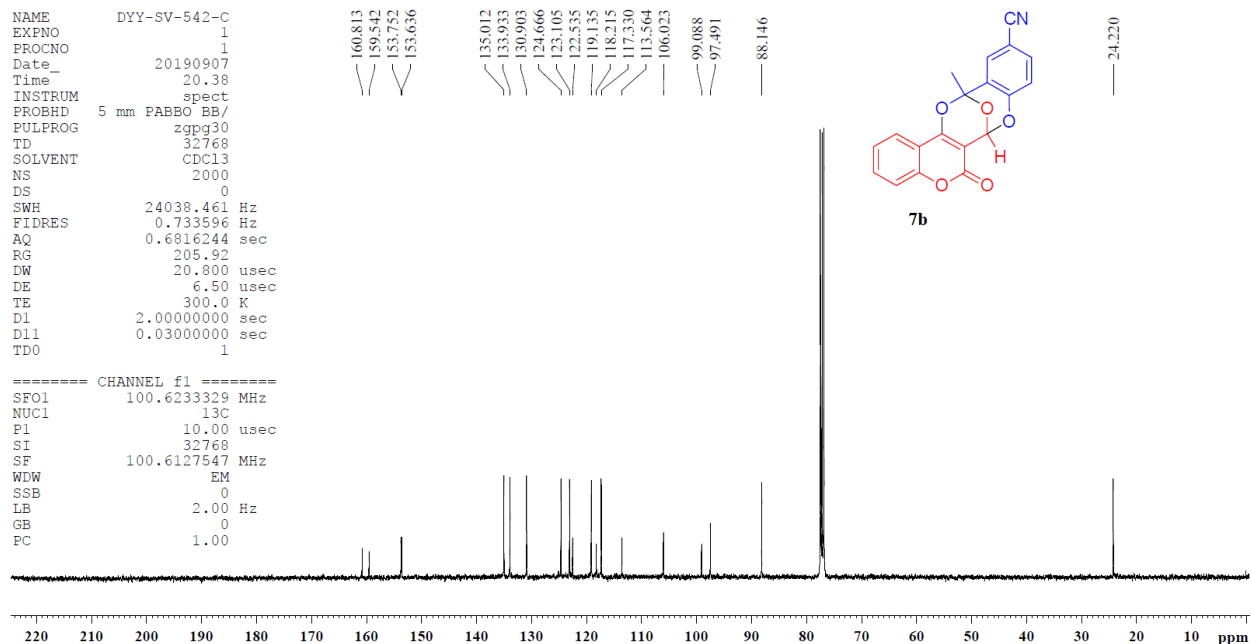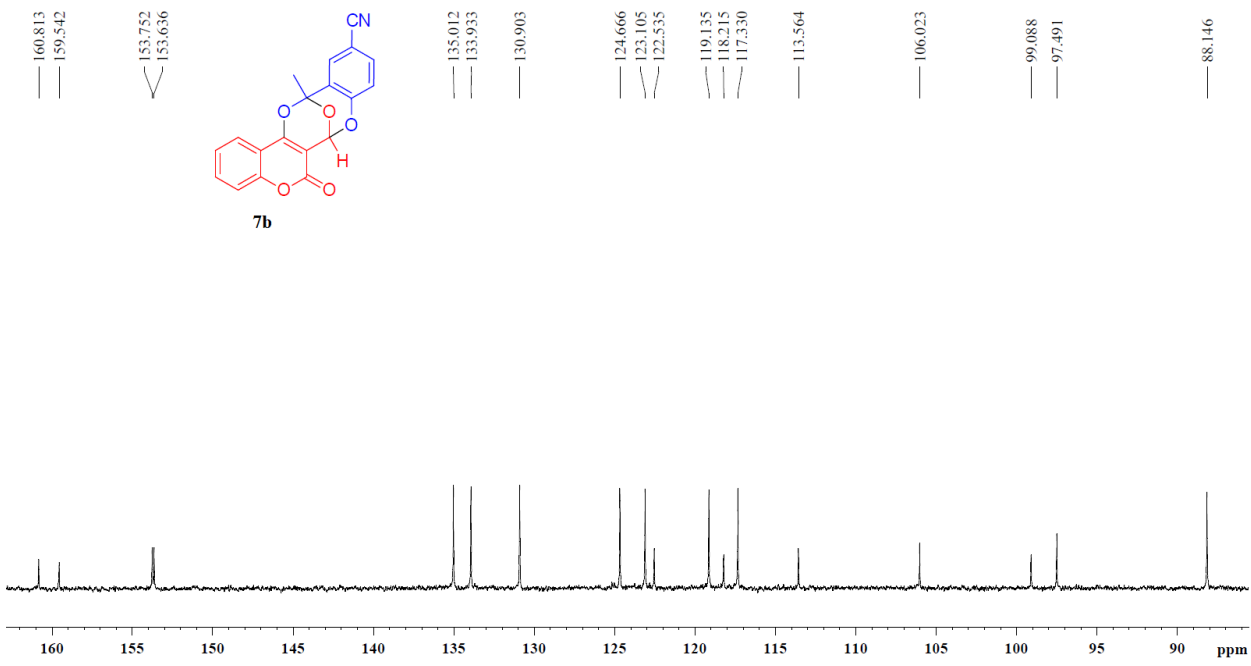

[NOTE: 7c = 5e]

NAME DYI-SV-594-H2  
 EXPNO 1  
 PROCNO 1  
 Date\_ 20191130  
 Time\_ 13.26  
 INSTRUM spect  
 PROBHD 5 mm PABBO BB/  
 PULPROG zg30  
 TD 32768  
 SOLVENT CDC13  
 NS 16  
 DS 0  
 SWH 8012.820 Hz  
 FIDRES 0.244532 Hz  
 AQ 2.0447731 sec  
 RG 205.92  
 DW 62.400 usec  
 DE 16.68 usec  
 TE 300.0 K  
 DL 2.00000000 sec  
 TD0 1

===== CHANNEL f1 =====  
 SFO1 400.1324008 MHz  
 NUC1 1H  
 P1 13.30 usec  
 SI 16384  
 SF 400.1300090 MHz  
 WDW EM  
 SSB 0  
 LB 0.00 Hz  
 GB 0  
 EC 1.00

7.794  
7.790  
7.773  
7.769  
7.742  
7.734  
7.722  
7.715  
7.632  
7.628  
7.611  
7.607  
7.593  
7.588  
7.424  
7.417  
7.406  
7.398  
7.339  
7.337  
7.331  
7.329  
7.319  
7.310  
7.308  
7.301  
7.298  
6.590

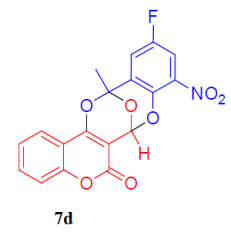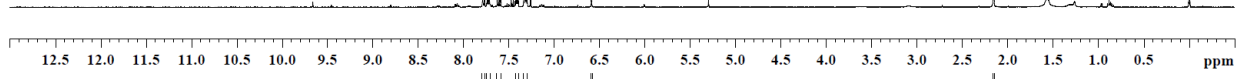

1.124  
1.128  
1.175  
1.140  
2.162  
1.000

7.794  
7.790  
7.773  
7.769  
7.742  
7.734  
7.722  
7.715  
7.632  
7.628  
7.611  
7.607  
7.593  
7.588

7.424  
7.417  
7.406  
7.398  
7.339  
7.337  
7.331  
7.329  
7.319  
7.310  
7.308  
7.301  
7.298

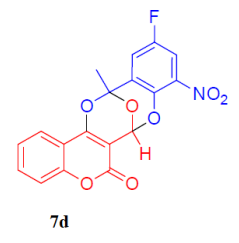

6.590

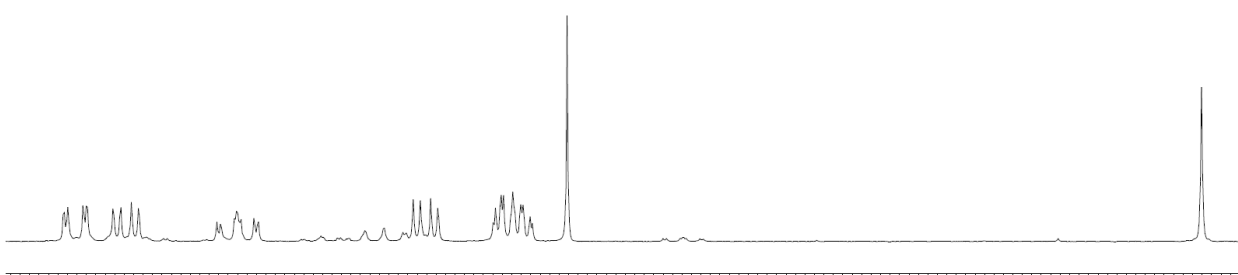

1.124  
1.128  
1.175

1.140  
2.162

1.000

```

NAME      DYY-SV-594-C
EXPNO     1
PROCNO    1
Date_     20191130
Time      10.45
INSTRUM   spect
PROBHD    5 mm PABBO BB/
PULPROG   zgpg30
TD         32768
SOLVENT   CDCl3
NS         2000
DS         0
SWH        24038.461 Hz
FIDRES     0.733596 Hz
AQ         0.6816244 sec
RG         205.92
DW         20.800 usec
DE         6.50 usec
TE         300.0 K
D1         2.00000000 sec
D11        0.03000000 sec
TD0        1

```

```

===== CHANNEL f1 =====
SF01      100.6233329 MHz
NUC1      13C
P1         10.00 usec
SI         32768
SF         100.6127540 MHz
WDW        EM
SSB        0
LB         2.00 Hz
GB         0
PC         1.00

```

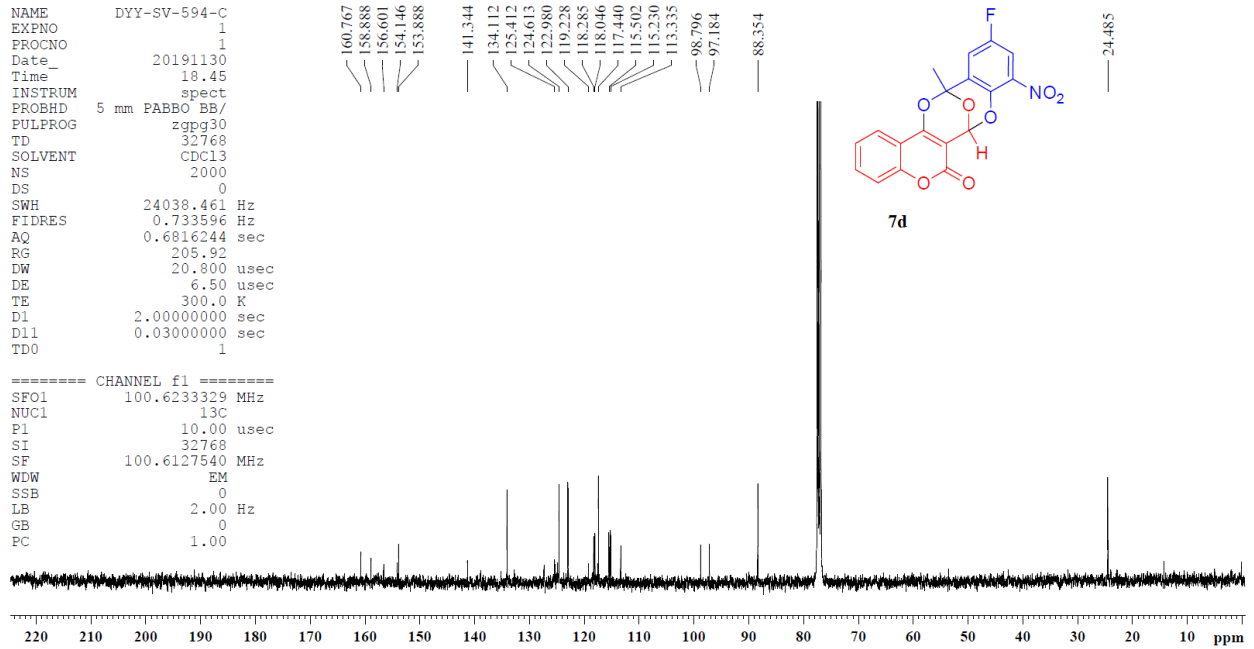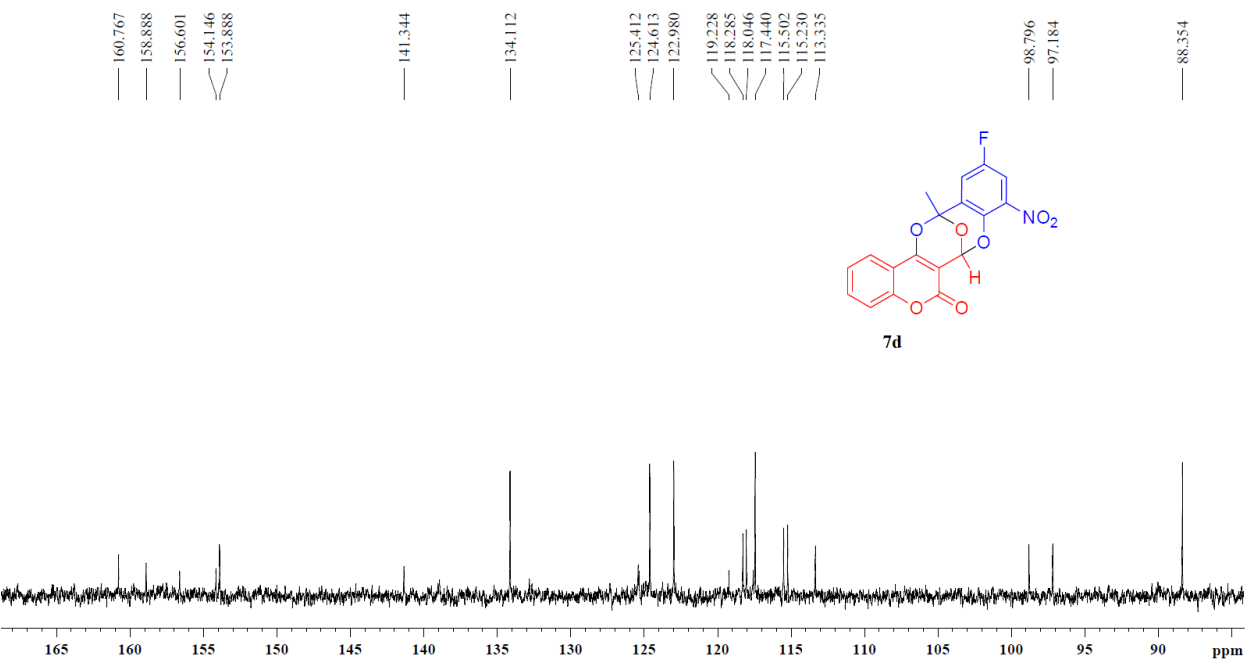

```

NAME      DYYSV-522-P
EXPNO    1
PROCNO   1
Date_    20190412
Time     10.24
INSTRUM  spect
PROBHD   5 mm PABBO BB/
PULPROG  zg30
TD       32768
SOLVENT  CDC13
NS       16
DS       0
SWH      8012.820 Hz
FIDRES   0.244532 Hz
AQ       2.0447731 sec
RG       205.92
DW       62.400 usec
DE       16.68 usec
TE       296.5 K
D1       2.00000000 sec
TD0      1

```

```

===== CHANNEL f1 =====
SF01    400.1324008 MHz
NUC1     1H
P1      13.30 usec
SI      16384
SF      400.1300081 MHz
WDW      EM
SSB      0
LB      0.00 Hz
GB      0
PC      1.00

```

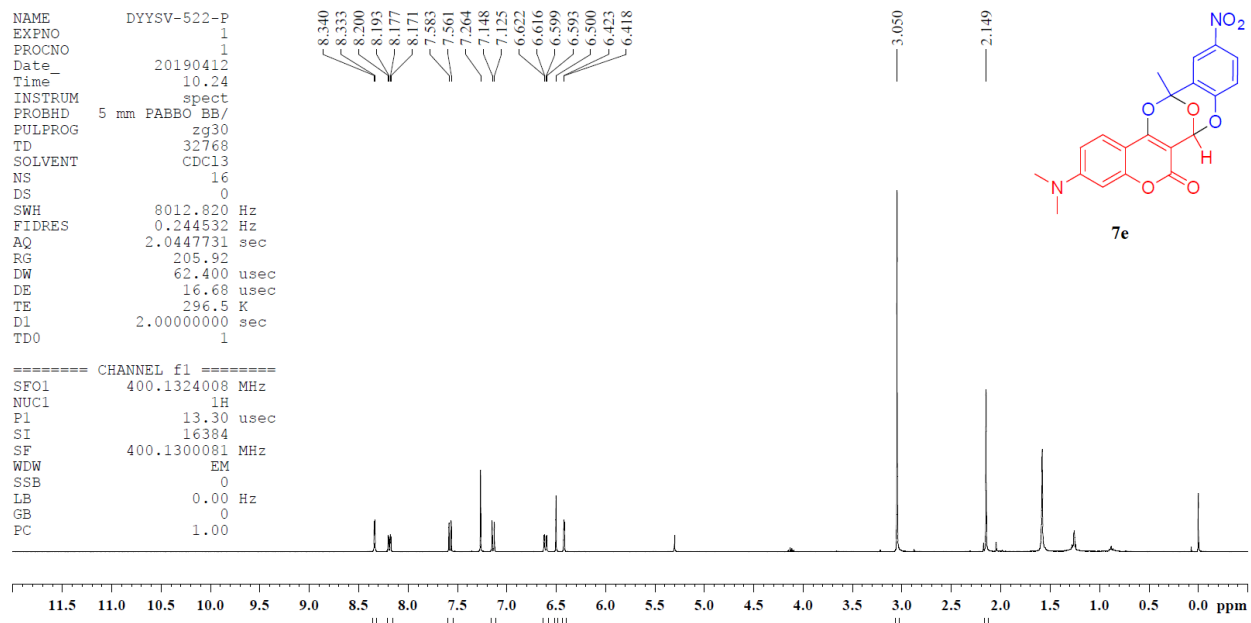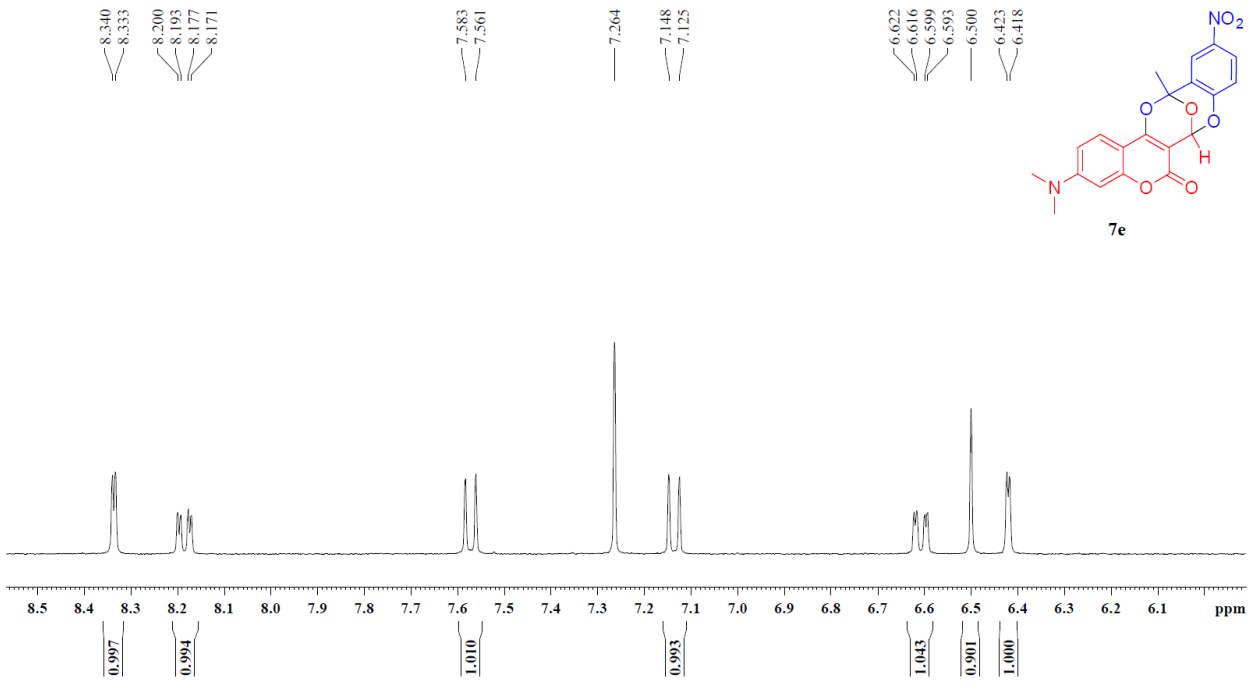

```

NAME      DYY-SV-522-P3
EXPNO    1
PROCNO   1
Date_    20190515
Time     23.05
INSTRUM  spect
PROBHD   5 mm PABBO BB/
PULPROG  zgpg30
TD       32768
SOLVENT  CDC13
NS       2000
DS       0
SWH      24038.461 Hz
FIDRES   0.733596 Hz
AQ       0.6816244 sec
RG       205.92
DW       20.800 usec
DE       6.50 usec
TE       298.5 K
D1       2.00000000 sec
D11      0.03000000 sec
TD0      1

```

```

===== CHANNEL f1 =====
SFO1    100.6233329 MHz
NUC1     13C
P1       10.00 usec
SI       32768
SF       100.6127549 MHz
WDW      EM
SSB      0
LB       2.00 Hz
GB       0
PC       1.00

```

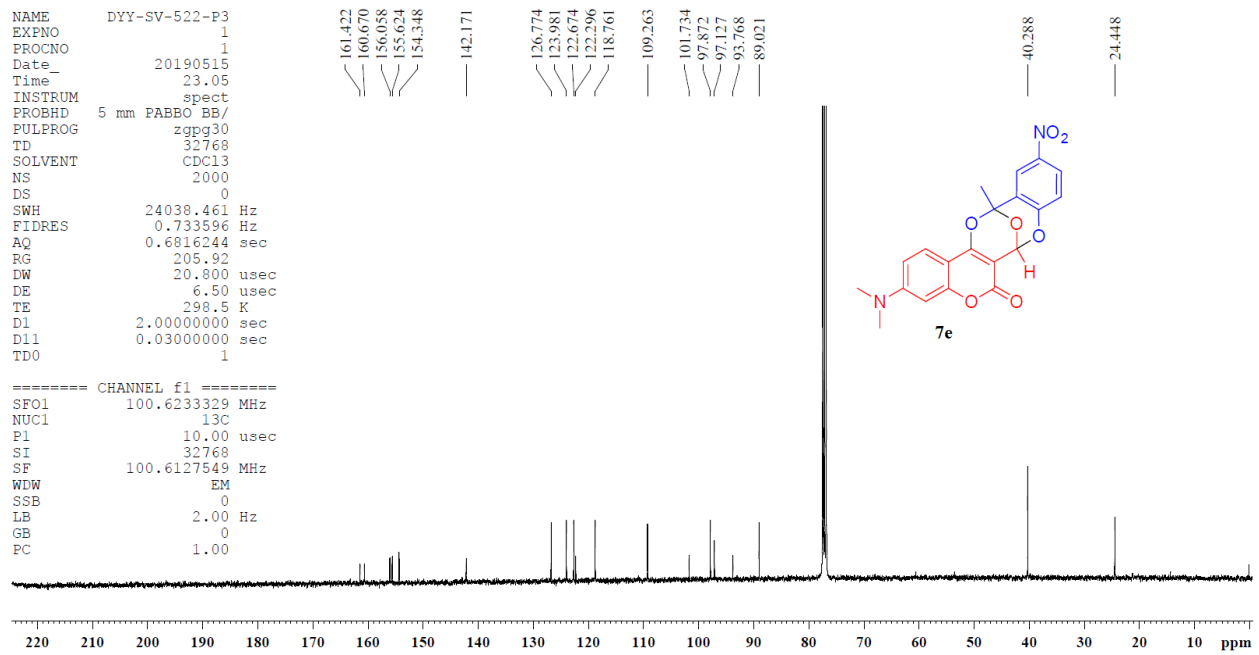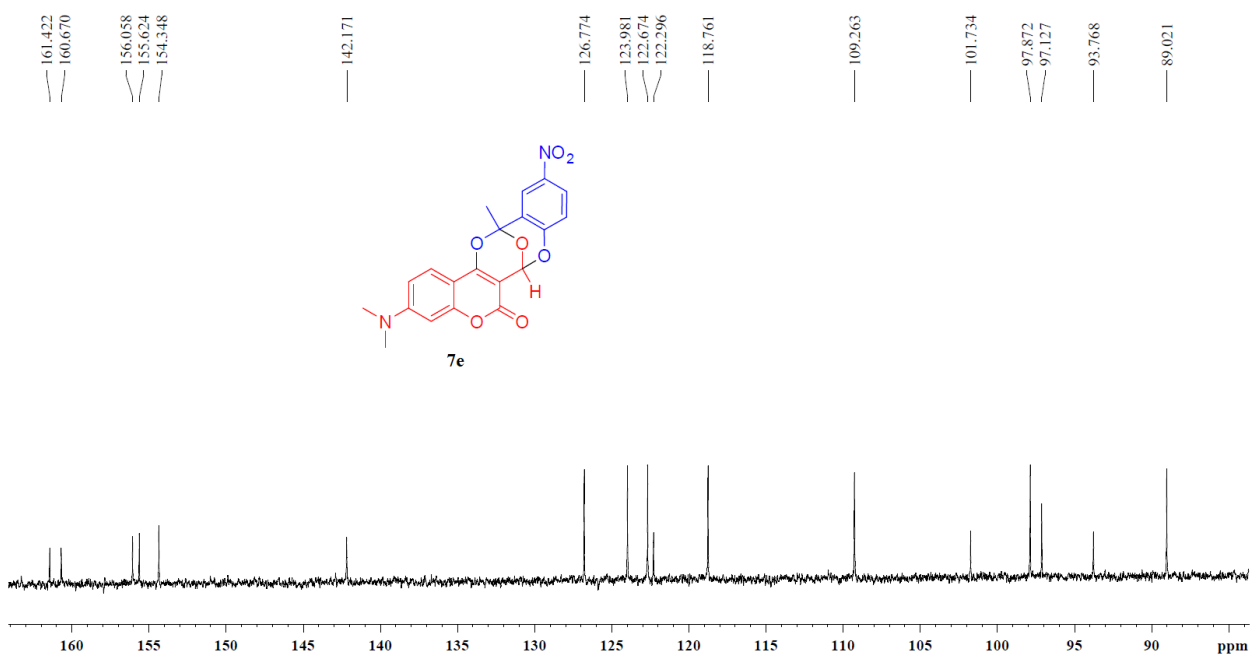

NAME DYV-sv-513-H  
 EXPNO 1  
 PROCNO 1  
 Date\_ 20190910  
 Time\_ 8.35  
 INSTRUM spect  
 PROBHD 5 mm PABBO BB/  
 PULPROG zg30  
 TD 32768  
 SOLVENT CDCl3  
 NS 8  
 DS 0  
 SWH 8012.820 Hz  
 FIDRES 0.244532 Hz  
 AQ 2.0447731 sec  
 RG 205.92  
 DW 62.400 usec  
 DE 16.68 usec  
 TE 300.0 K  
 D1 2.00000000 sec  
 TD0 1

===== CHANNEL f1 =====  
 SFO1 400.1324008 MHz  
 NUC1 1H  
 P1 13.30 usec  
 SI 16384  
 SF 400.1300081 MHz  
 WDW EM  
 SSB 0  
 LB 0.00 Hz  
 GB 0  
 PC 1.00

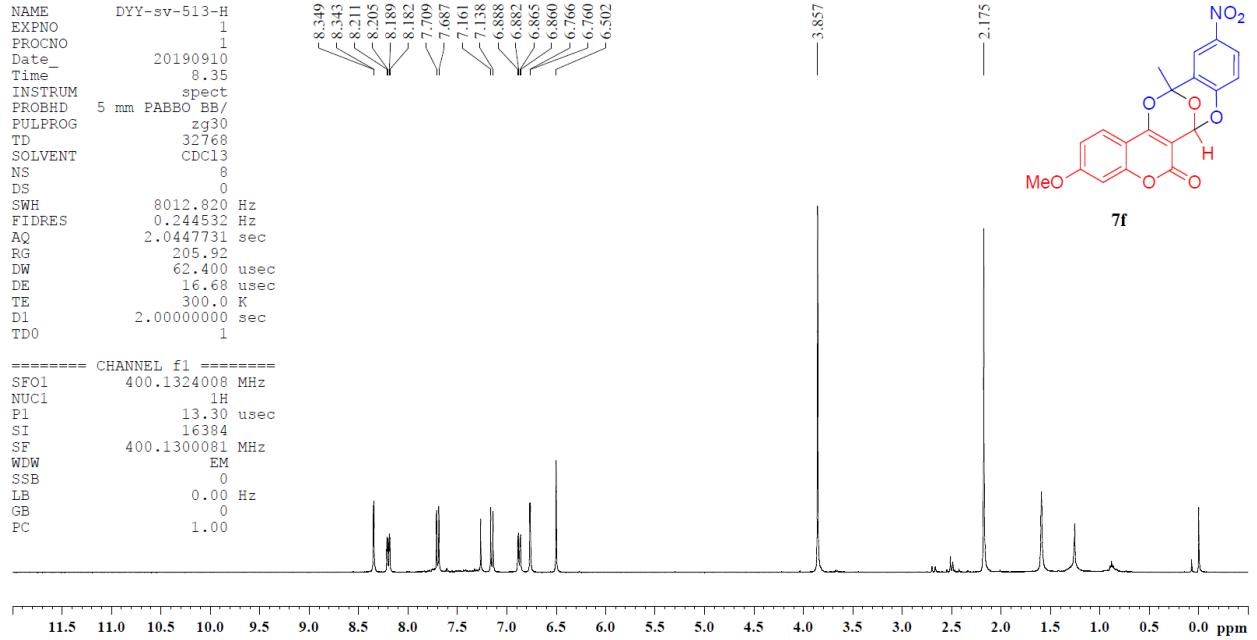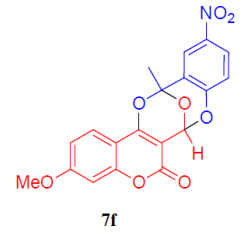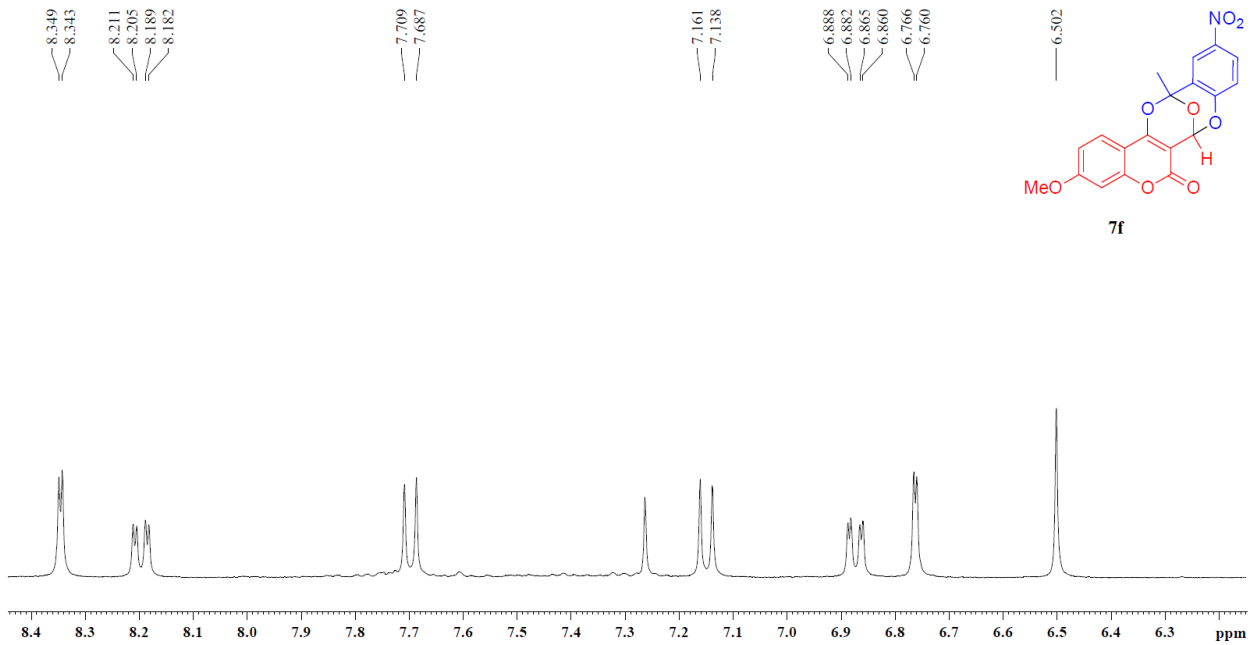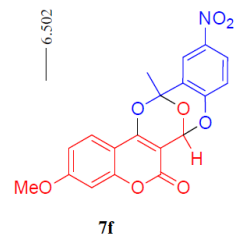

NAME DYV-SV-513-C  
 EXPNO 1  
 PROCNO 1  
 Date\_ 20190910  
 Time\_ 10.26  
 INSTRUM spect  
 PROBHD 5 mm PABBO BB/  
 PULPROG zgpg30  
 TD 32768  
 SOLVENT CDC13  
 NS 2200  
 DS 0  
 SWH 24038.461 Hz  
 FIDRES 0.733596 Hz  
 AQ 0.6816244 sec  
 RG 205.92  
 DW 20.800 usec  
 DE 6.50 usec  
 TE 300.0 K  
 D1 2.00000000 sec  
 D11 0.03000000 sec  
 TD0 1

===== CHANNEL f1 =====  
 SFO1 100.6233329 MHz  
 NUC1 13C  
 P1 10.00 usec  
 SI 32768  
 SF 100.6127545 MHz  
 WDW EM  
 SSB 0  
 LB 2.00 Hz  
 GB 0  
 PC 1.00

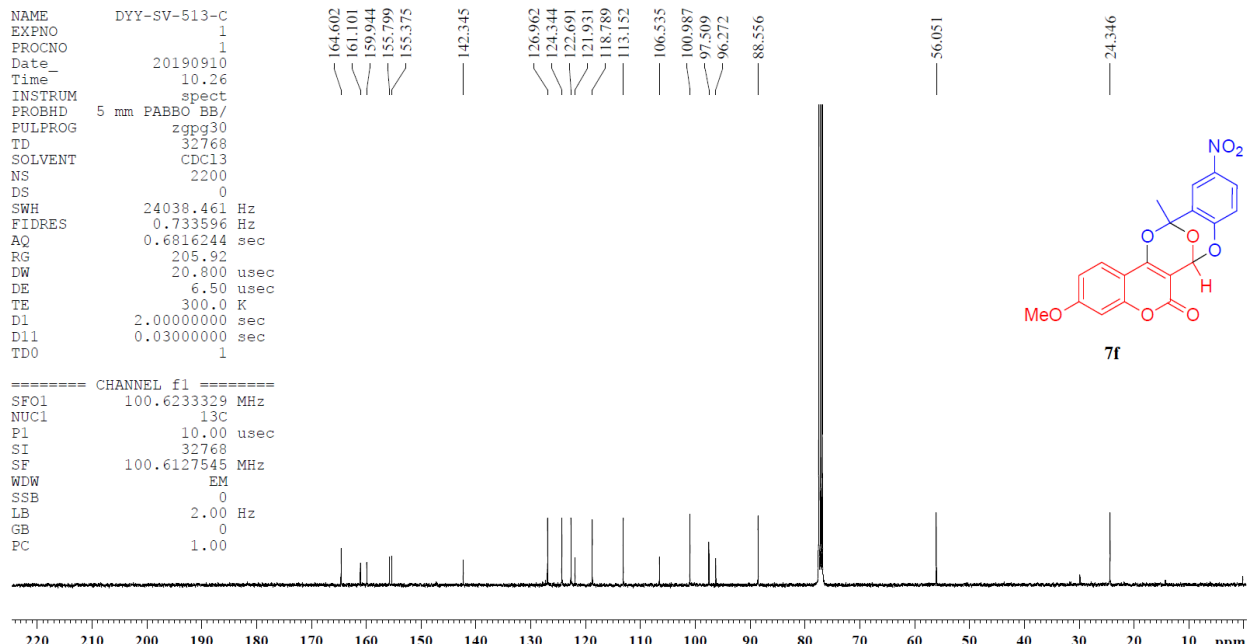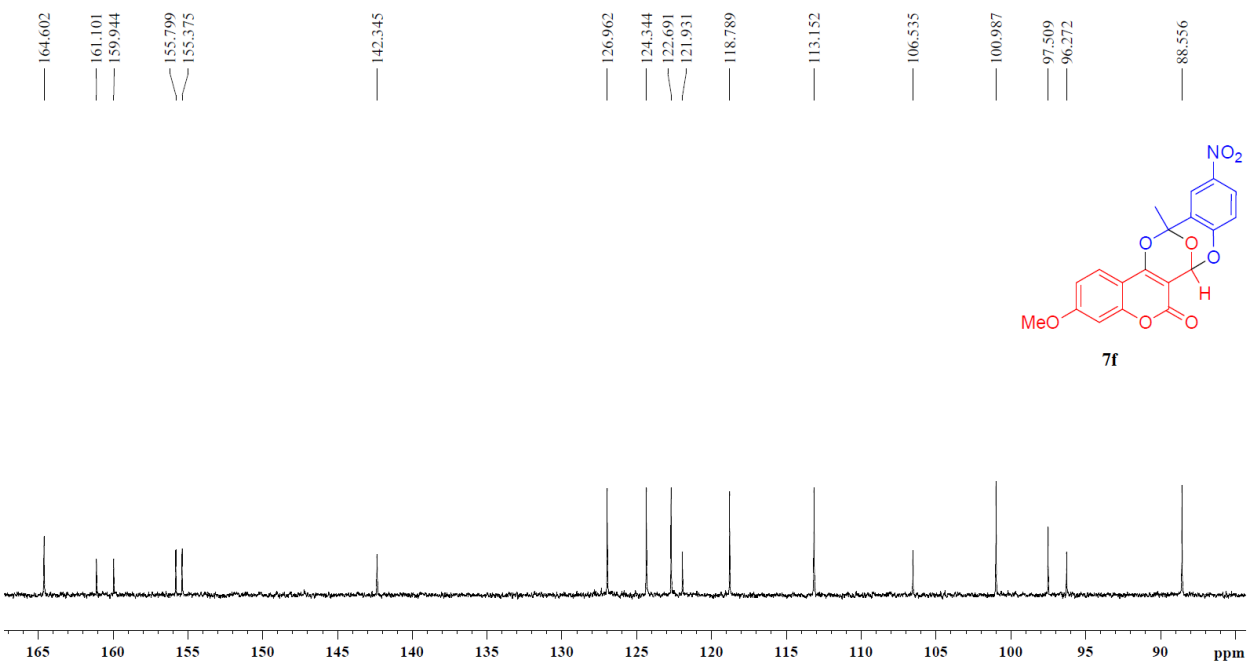

NAME DYY-SV-514  
 EXPNO 1  
 PROCNO 1  
 Date\_ 20190908  
 Time\_ 17.44  
 INSTRUM spect  
 PROBDH 5 mm PABBO BB/  
 PULPROG zg30  
 TD 32768  
 SOLVENT CDCl3  
 NS 12  
 DS 0  
 SWH 8012.820 Hz  
 FIDRES 0.244532 Hz  
 AQ 2.0447731 sec  
 RG 205.92  
 DW 62.400 usec  
 DE 16.68 usec  
 TE 300.0 K  
 DL 2.00000000 sec  
 TD0 1

8.365  
 8.229  
 8.206  
 7.498  
 7.480  
 7.312  
 7.301  
 7.266  
 7.181  
 7.158  
 6.520

2.208

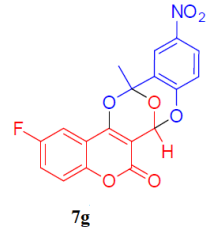

===== CHANNEL f1 =====  
 SFO1 400.1324008 MHz  
 NUC1 1H  
 P1 13.30 usec  
 SI 16384  
 SF 400.1300074 MHz  
 WDW EM  
 SSB 0  
 LB 0.00 Hz  
 GB 0  
 PC 1.00

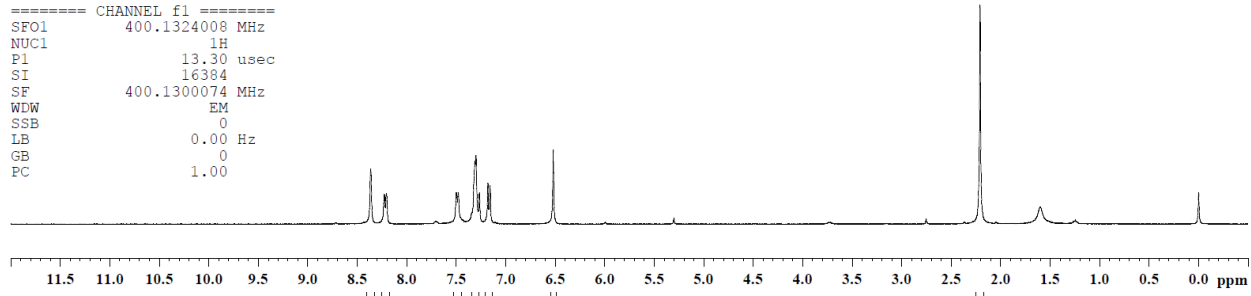

1.077  
 1.015  
 1.115  
 2.095  
 1.036  
 1.000  
 3.160

8.365  
8.229  
8.206

7.498  
7.480

7.312  
7.301  
7.266

7.181  
7.158

6.520

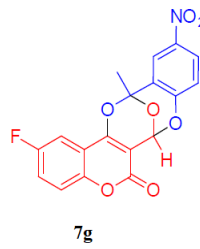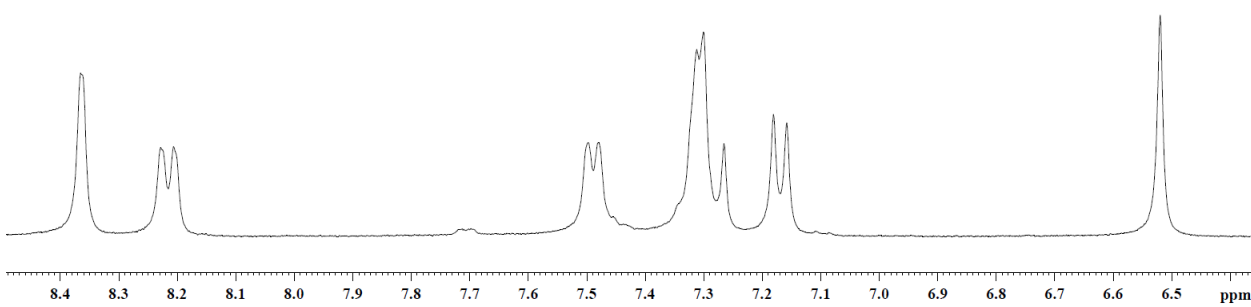

1.077  
1.015

1.115  
2.095

1.036

1.000



```

NAME      DYY-SV-514-C
EXPNO     1
PROCNO    1
Date_     20190908
Time      19.22
INSTRUM   spect
PROBHD    5 mm PABBO BB/
PULPROG   zgpg30
TD         32768
SOLVENT   CDCl3
NS         2000
DS         0
SWH        24038.461 Hz
FIDRES     0.733596 Hz
AQ         0.6816244 sec
RG         205.92
DW         20.800 usec
DE         6.50 usec
TE         300.0 K
D1         2.00000000 sec
D11        0.03000000 sec
TDO        1

```

```

===== CHANNEL f1 =====
SFO1      100.6233329 MHz
NUC1       13C
P1         10.00 usec
SI         32768
SF         100.6127543 MHz
WDW        EM
SSB         0
LB         2.00 Hz
GB         0
PC         1.00

```

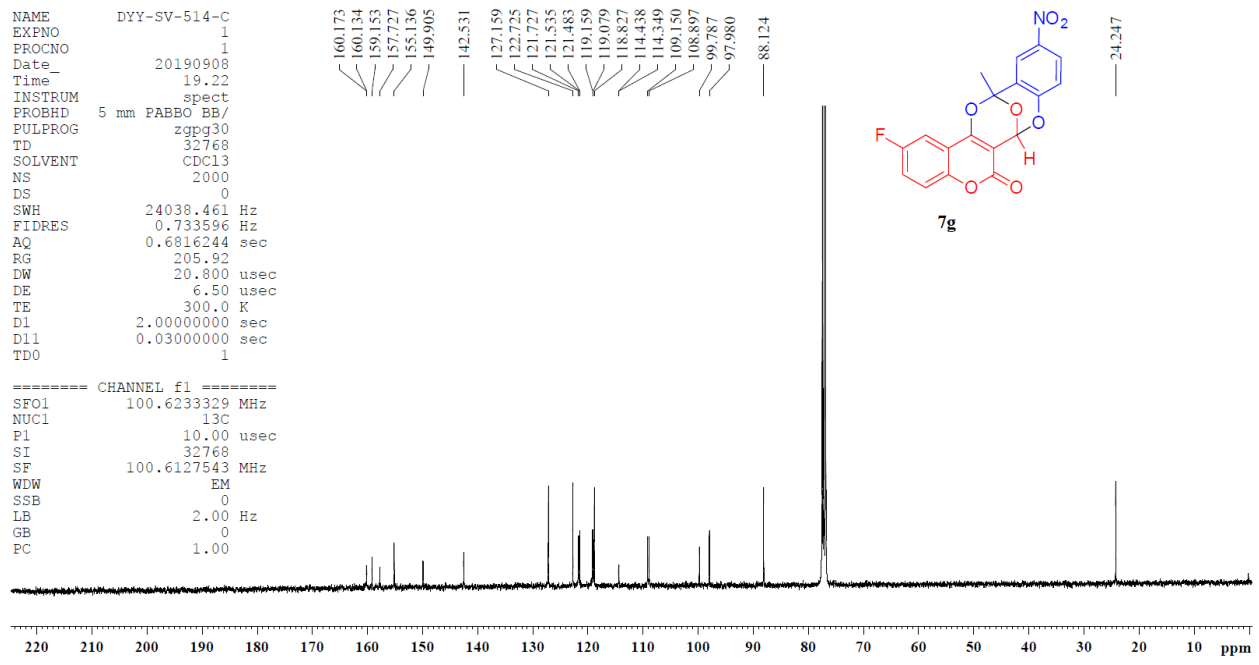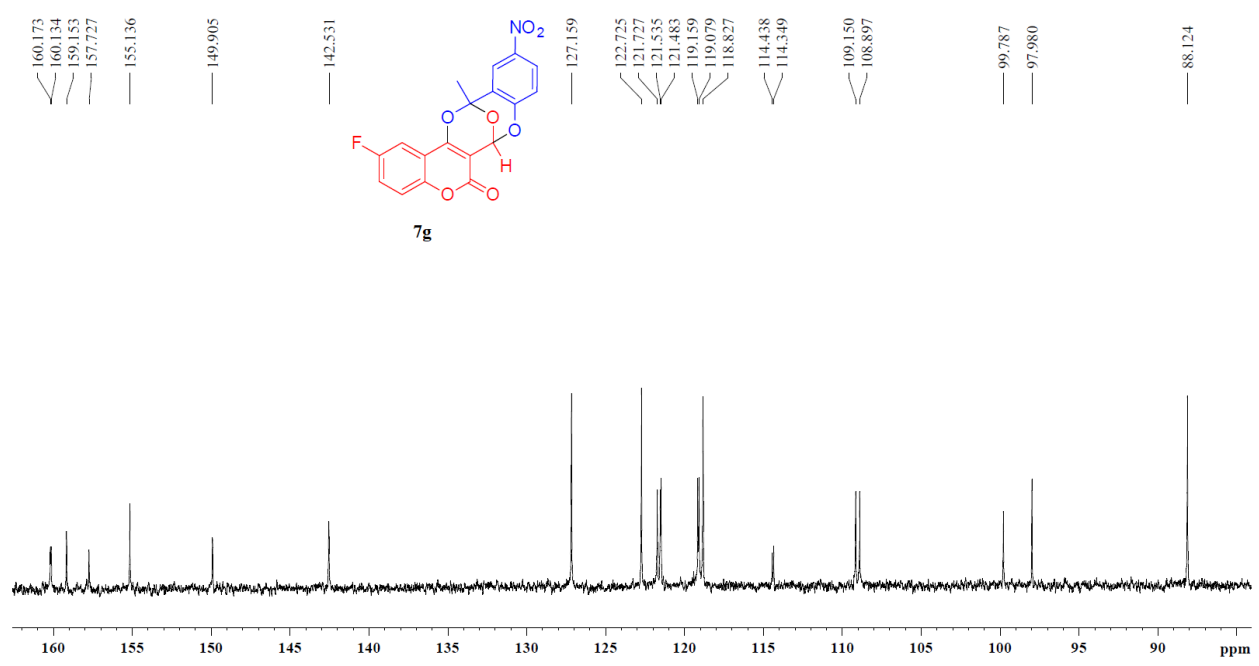

NAME DYY-SV-585  
 EXPNO 1  
 PROCNO 1  
 Date\_ 20191105  
 Time\_ 10.33  
 INSTRUM spect  
 PROBHD 5 mm PABBO BB/  
 PULPROG zg30  
 TD 32768  
 SOLVENT CDCl3  
 NS 16  
 DS 0  
 SWH 8012.820 Hz  
 FIDRES 0.244532 Hz  
 AQ 2.0447731 sec  
 RG 205.92  
 DW 62.400 usec  
 DE 16.68 usec  
 TE 300.0 K  
 D1 2.00000000 sec  
 TD0 1

===== CHANNEL f1 =====  
 SFO1 400.1324008 MHz  
 NUC1 1H  
 P1 13.30 usec  
 SI 16384  
 SF 400.1300092 MHz  
 WDW EM  
 SSB 0  
 LB 0.00 Hz  
 GB 0  
 PC 1.00

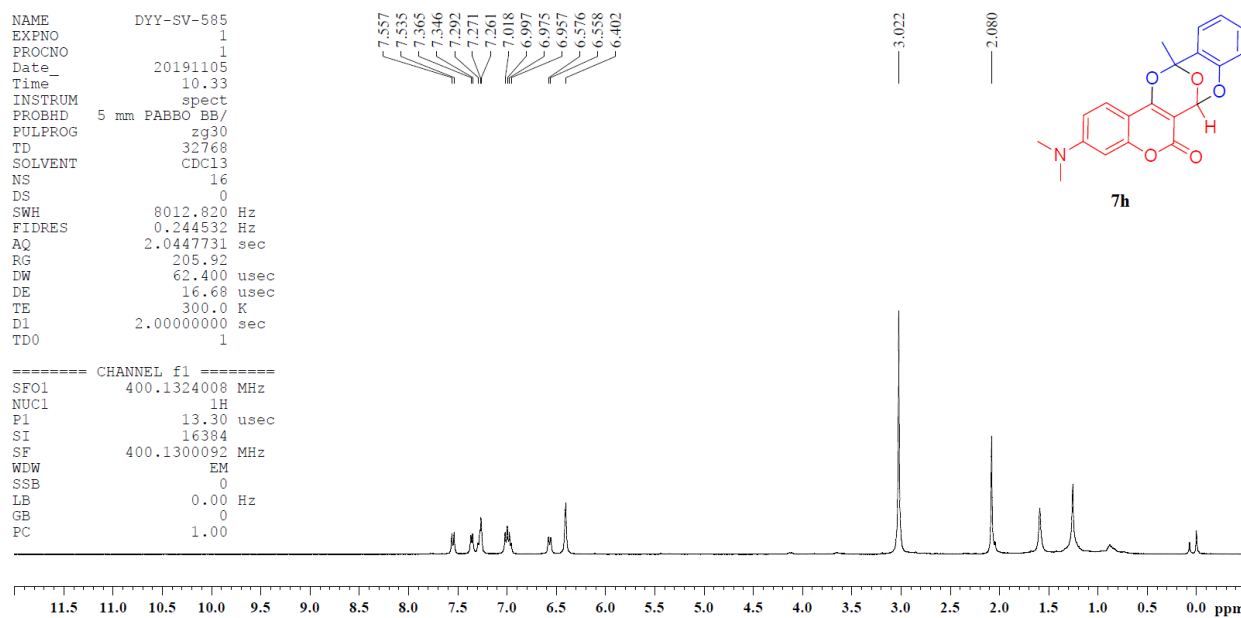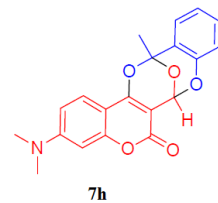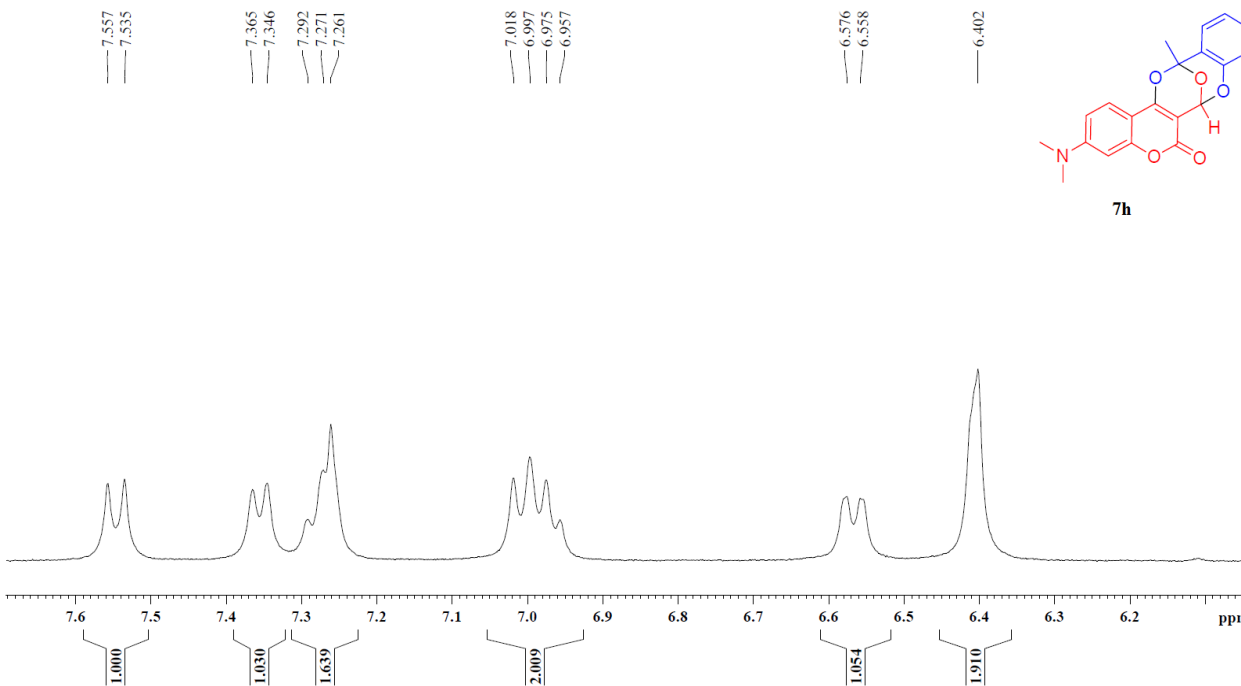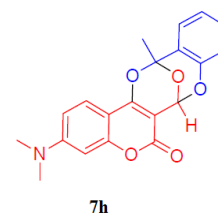

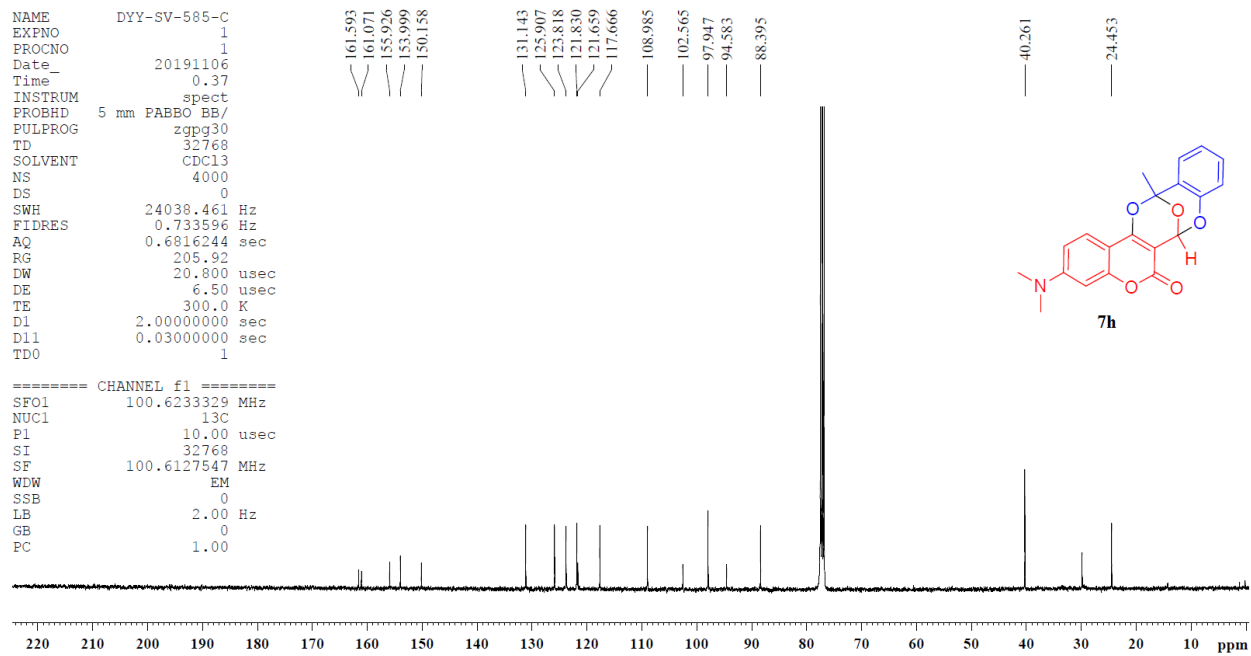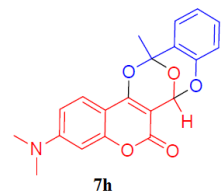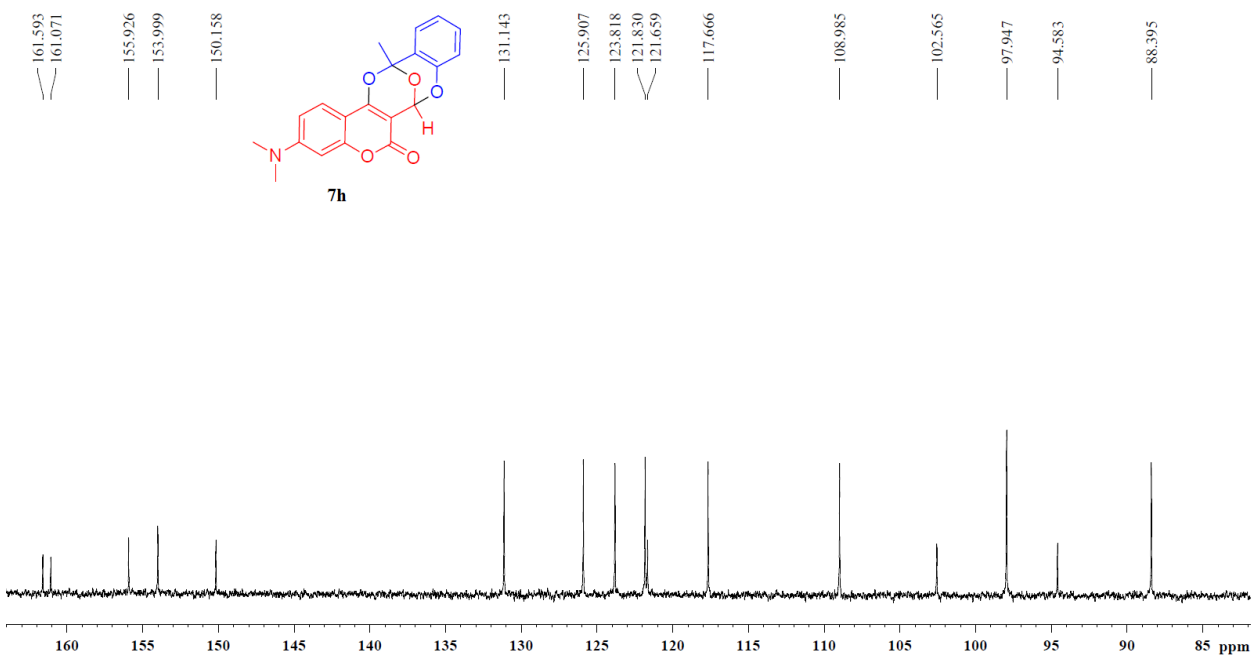

Supplement: d0nj02288h1.pdf [file d0nj02288h1.pdf]
